# Supplementary material for: Chemo-, regio- and stereoselective synthesis of monofluoroalkenes via a tandem fluorination–desulfonation sequence
Source: Royal Society of Chemistry journal article supplement (doi:10.1039/d1cc03207k), 2021-01-01
Supplement: d1cc03207k1.pdf [file d1cc03207k1.pdf]

## *Supporting Information*

# **Chemo-, Regio- and Stereoselective Synthesis of Monofluoroalkenes *via* a Tandem Fluorination- Desulfonation Sequence**

Ren-Yin Yang, Bo Xu\*

College of Chemistry, Chemical Engineering and Biotechnology, Donghua University, Shanghai  
201620, P. R. China

### **Table of contents**

|                                                                                  |     |
|----------------------------------------------------------------------------------|-----|
| <b>Table of contents</b> .....                                                   | S1  |
| <b>1. General</b> .....                                                          | S2  |
| <b>2. General procedure for the synthesis of S1</b> .....                        | S2  |
| <b>3. General procedure for the synthesis of 1</b> .....                         | S2  |
| <b>4. General procedure for the synthesis of monofluoroalkenes (2a-2z)</b> ..... | S3  |
| <b>5. Gram scale synthesis of 2b</b> .....                                       | S3  |
| <b>6. Synthesis of intermediate 1s-F and 1u-F</b> .....                          | S3  |
| <b>7. The characterization data of compounds</b> .....                           | S4  |
| <b>8. References</b> .....                                                       | S11 |
| <b>9. Copies of NMR spectra</b> .....                                            | S11 |

## 1. General

$^1\text{H}$  NMR (400 MHz, 600 MHz),  $^{13}\text{C}$  NMR (100 MHz, 150 MHz) and  $^{19}\text{F}$  NMR (376 MHz, 564 MHz) spectra were recorded on a Bruker NMR apparatus. The chemical shifts are reported in  $\delta$  (ppm) values ( $^1\text{H}$  and  $^{13}\text{C}$  NMR relative to  $\text{CHCl}_3$ ,  $\delta$  7.26 ppm for  $^1\text{H}$  NMR and  $\delta$  77.0 ppm for  $^{13}\text{C}$  NMR). Or alternatively,  $^1\text{H}$  NMR chemical shifts were referenced to tetramethylsilane signal (0 ppm). Multiplicities are recorded by s (singlet), d (doublet), t (triplet), q (quartet), p (pentet), m (multiplet) and br (broad). Coupling constants ( $J$ ) are reported in Hertz (Hz). TLC was developed on silica gel 60 F254 glass plates. The products were purified using a commercial flash chromatography system or a regular glass column. The High-Resolution Mass measurements were conducted using Agilent 7250 GC/Q-TOF equipment.

Commercial reagents and solvents were obtained from commercial providers and used without further purification. Work-ups and purifications were performed using commercial reagent-grade solvents. Most benzyl bromides were commercially available from Sigma-Aldrich, TCI, and Bidepharm.

## 2. General procedure for the synthesis of S1

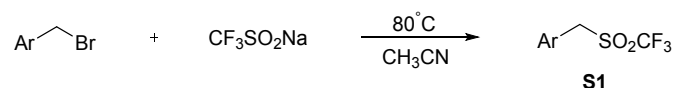

Under nitrogen atmosphere, a mixture of benzyl bromide **1** (1.0 equiv) and  $\text{NaSO}_2\text{CF}_3$  **2** (2.0 equiv) in acetonitrile (0.2 M) was heated at 80 °C for about 12 to 24 h. The progress of the reaction was monitored by TLC and GC-MS. After completion, the reaction mixture was cooled down to room temperature; the reaction mixture was then concentrated in a vacuum. The residue was washed with dichloromethane and filtered through Celite to give the crude product. The crude product was purified by silica gel chromatography eluted with PE: EtOAc = 20:1 or recrystallization from a mixture of hexane and dichloromethane to give product **S1**.<sup>1,2</sup>

## 3. General procedure for the synthesis of 1

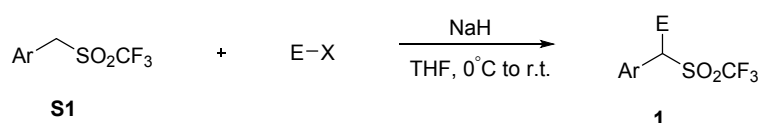

To a solution of **S1** (1.0 equiv.) in THF (0.2 M/L) was added NaH (1.1 equiv) under nitrogen atmosphere at 0 °C. The mixture was stirred at 0 °C for 10 minutes, and then benzyl bromide or alkyl iodide in THF was added via syringe. The mixture was stirred at 0 °C to room temperature for several hours. After completion of the reaction (monitored by TLC), the mixture was diluted with  $\text{NH}_4\text{Cl}$  (aq.), and extracted with ethyl acetate. The combined organic layers were washed with brine, dried over anhydrous  $\text{Na}_2\text{SO}_4$ , filtered, concentrated under vacuum. The residue was purified by silica gel column chromatography eluting with a mixture of ethyl acetate and petroleum ether to give products **1**.<sup>1,2</sup>

## 4. General procedure for the synthesis of monofluoroalkenes (2a-2z)

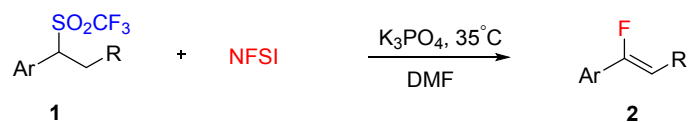

To a Schlenk tube was added **1** (0.2 mmol, 1.0 equiv), NFSI (0.2 mmol, 1.0 equiv, 65.0 mg) and  $\text{K}_3\text{PO}_4$  (0.6 mmol, 127 mg) in DMF (1.0 mL). The reaction mixture was stirred at 35 °C for 12-15 h. After completion of the reaction (monitored by TLC), the mixture was diluted with water (10 mL), extracted with ethyl acetate (3 mL $\times$ 3). The combined organic phases were dried over anhydrous  $\text{Na}_2\text{SO}_4$ , filtered, concentrated under vacuum to give pure products. Compounds **2p-2r** were further purified by column chromatography on silica gel eluting with a mixture of ethyl acetate and petroleum ether (or 100 % petroleum ether) to give the desired product monofluoroalkenes **2**.

### 5. Gram scale synthesis of **2b**

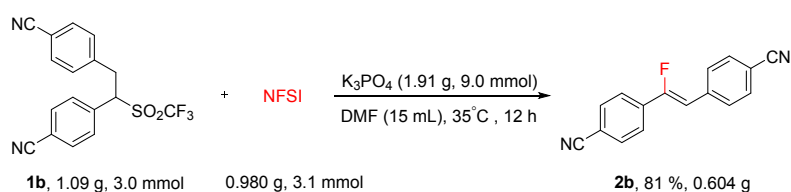

To a Schlenk tube was added **1b** (3.0 mmol, 1.09 g, 1.0 equiv), NFSI (3.1 mmol, 0.98 g, 1.0 equiv) and  $\text{K}_3\text{PO}_4$  (9.0 mmol, 1.91g) in DMF (15 mL). The reaction mixture was stirred at 35 °C for 12 h. After completion of the reaction (monitored by TLC), the mixture was diluted with water (100 mL), and a white solid precipitated. Filtration of the mixture and drying of obtained solids under vacuum gave pure product **2b**.

### 6. Synthesis of intermediate **1s-F** and **1u-F**

Under nitrogen atmosphere, to a solution of **1s** or **1u** (0.5 mmol, 1.0 equiv) and NFSI (0.55 mmol, 170 mg, 1.1 equiv) in THF (5 mL) at -30 °C was added NaH (60% in mineral oil, 60 mg, 1.5 mmol, 3.0 equiv). The reaction mixture was stirred at -30 °C for 1.0 h. After completion of the reaction (monitored by TLC), the mixture was quenched by saturated  $\text{NH}_4\text{Cl}$  (aq.) and extracted with ethyl acetate. Combined organic phases were dried over anhydrous  $\text{Na}_2\text{SO}_4$ , filtered, concentrated under vacuum. The residue was further purified by silica-gel column chromatography eluting with a mixture of EA and PE to give product **1s-F** and **1u-F**.

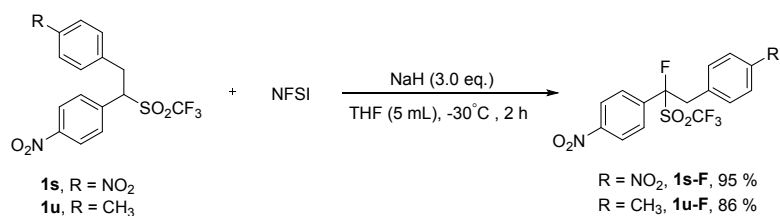

## 7. The characterization data of compounds

### Ethyl (Z)-4-(2-(4-cyanophenyl)-2-fluorovinyl)benzoate (2a)

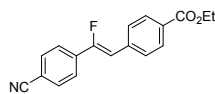

White solid, 48.3 mg, 82%;  $^1\text{H}$  NMR (400 MHz, Chloroform-*d*)  $\delta$ : 8.08 – 8.05 (m, 2H), 7.77 – 7.70 (m, 6H), 6.49 (d,  $J = 38.4$  Hz, 1H), 4.39 (q,  $J = 7.1$  Hz, 2H), 1.41 (t,  $J = 7.1$  Hz, 3H).  $^{19}\text{F}$  NMR (376 MHz, Chloroform-*d*)  $\delta$ : -96.9 (d,  $J = 20.5$  Hz), -112.7 (d,  $J = 38.5$  Hz).  $^{13}\text{C}$  NMR (100 MHz, Chloroform-*d*)  $\delta$ : 166.2, 156.5 (d,  $J = 261.3$  Hz), 137.0 (d,  $J = 3.5$  Hz), 136.5 (d,  $J = 28.1$  Hz), 132.5 (d,  $J = 2.3$  Hz), 129.9, 129.8 (d,  $J = 2.5$  Hz), 129.1 (d,  $J = 8.4$  Hz), 124.9 (d,  $J = 7.7$  Hz), 118.4, 112.8, 108.3 (d,  $J = 9.8$  Hz), 61.1, 14.4. HRMS (EI<sup>+</sup>) calcd. for  $\text{C}_{18}\text{H}_{14}\text{O}_2\text{NF}$  [ $\text{M}$ ]<sup>+</sup>: 295.1003; found: 295.0999.

### (Z)-4,4'-(1-fluoroethene-1,2-diyl)dibenzonitrile (2b)

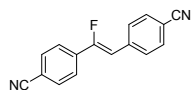

White solid, 45.6 mg, 92%;  $^1\text{H}$  NMR (400 MHz, Chloroform-*d*)  $\delta$ : 7.79 – 7.73 (m, 6H), 7.68 (d,  $J = 8.4$  Hz, 2H), 6.47 (d,  $J = 37.8$  Hz, 1H).  $^{19}\text{F}$  NMR (376 MHz, Chloroform-*d*)  $\delta$ : -94.0 (d,  $J = 19.9$  Hz),  $\delta$ : -111.0 (d,  $J = 37.8$  Hz).  $^{13}\text{C}$  NMR (100 MHz, Chloroform-*d*)  $\delta$ : 157.3 (d,  $J = 263.1$  Hz), 137.2 (d,  $J = 3.2$  Hz), 136.0 (d,  $J = 28.3$  Hz), 132.6 (d,  $J = 2.3$  Hz), 132.5, 129.6 (d,  $J = 8.6$  Hz), 125.1 (d,  $J = 7.7$  Hz), 118.7 (CN), 118.2 (CN), 113.3, 111.4 (d,  $J = 3.0$  Hz), 107.5 (d,  $J = 9.5$  Hz). HRMS (EI<sup>+</sup>) calcd. for  $\text{C}_{16}\text{H}_9\text{N}_2\text{F}$  [ $\text{M}$ ]<sup>+</sup>: 248.0744; found: 248.0748.

### (Z)-4-(1-fluoro-2-(4-nitrophenyl)vinyl)benzonitrile (2c)

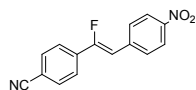

Yellow solid, 43.4 mg, 81%;  $^1\text{H}$  NMR (600 MHz, Chloroform-*d*)  $\delta$ : 8.26 (d,  $J = 8.9$  Hz, 2H), 7.81 – 7.79 (m, 4H), 7.75 (d,  $J = 8.5$  Hz, 2H), 6.53 (d,  $J = 37.6$  Hz, 1H).  $^{19}\text{F}$  NMR (565 MHz, Chloroform-*d*)  $\delta$ : -92.8 (d,  $J = 20.1$  Hz), -110.3 (d,  $J = 37.6$  Hz).  $^{13}\text{C}$  NMR (150 MHz, Chloroform-*d*)  $\delta$ : 157.6 (d,  $J = 264.0$  Hz), 146.9, 139.1 (d,  $J = 3.4$  Hz), 135.9 (d,  $J = 27.7$  Hz), 132.6 (d,  $J = 2.2$  Hz), 129.8 (d,  $J = 8.8$  Hz), 125.2 (d,  $J = 7.7$  Hz), 124.0, 118.2, 113.4, 107.1 (d,  $J = 9.5$  Hz). HRMS (EI<sup>+</sup>) calcd. for  $\text{C}_{15}\text{H}_9\text{O}_2\text{N}_2\text{F}$  [ $\text{M}$ ]<sup>+</sup>: 268.0643; found: 268.0646.

### (Z)-4-(2-(2-Chloro-4-fluorophenyl)-1-fluorovinyl)benzonitrile (2d)

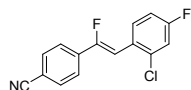

White solid, 39.0 mg, 71%;  $^1\text{H}$  NMR (400 MHz, Chloroform-*d*)  $\delta$ : 7.96 (dd,  $J = 8.9, 6.1$  Hz, 1H), 7.76-7.70 (m, 4H), 7.18 (dd,  $J = 8.4, 2.7$  Hz, 1H), 7.05 (td,  $J = 8.4, 2.7$  Hz, 1H), 6.81 (d,  $J = 37.7$  Hz, 1H).  $^{19}\text{F}$  NMR (376 MHz, Chloroform-*d*)  $\delta$ : -99.7 (d,  $J = 19.9$  Hz), -110.2 (q,  $J = 7.9$  Hz), -116.2 (d,  $J = 37.9$  Hz).  $^{13}\text{C}$  NMR (100 MHz, Chloroform-*d*)  $\delta$ : 161.7 (d,  $J = 250.0$  Hz), 156.0 (d,  $J = 259.9$  Hz), 136.5 (d,  $J = 28.6$  Hz), 134.3 (dd,  $J = 10.0, 1.2$  Hz), 132.5 (d,  $J = 2.2$  Hz), 131.8 (dd,  $J = 14.1, 8.7$  Hz), 126.9 (t,

$J = 3.7$  Hz), 124.9 (d,  $J = 7.6$  Hz), 118.4 (CN), 117.1 (d,  $J = 24.8$  Hz), 114.6 (d,  $J = 21.3$  Hz), 112.7, 103.8 (dd,  $J = 8.5, 1.4$  Hz). HRMS (EI<sup>+</sup>) calcd. for C<sub>15</sub>H<sub>8</sub>NF<sub>2</sub>Cl [M]<sup>+</sup>: 275.0308; found: 275.0305.

**(Z)-4-(2-(4-Chlorophenyl)-1-fluorovinyl)benzonitrile (2e)**

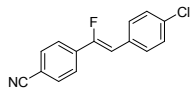

White solid, 43.4 mg, 79%; <sup>1</sup>H NMR (400 MHz, Chloroform-*d*)  $\delta$ : 7.73 – 7.68 (m, 4H), 7.59 – 7.56 (m, 2H), 7.38 – 7.34 (m, 2H), 6.40 (d,  $J = 38.5$  Hz, 1H). <sup>19</sup>F NMR (376 MHz, Chloroform-*d*)  $\delta$ : -115.2 (d,  $J = 38.6$  Hz). <sup>13</sup>C NMR (100 MHz, Chloroform-*d*)  $\delta$ : 155.5 (d,  $J = 258.9$  Hz), 136.7 (d,  $J = 28.4$  Hz), 134.0 (d,  $J = 3.8$  Hz), 132.5 (d,  $J = 2.4$  Hz), 131.2 (d,  $J = 3.2$  Hz), 130.5 (d,  $J = 8.4$  Hz), 129.0, 124.6 (d,  $J = 7.7$  Hz), 118.4 (CN), 112.5, 108.0 (d,  $J = 10.1$  Hz). HRMS (EI<sup>+</sup>) calcd. for C<sub>15</sub>H<sub>9</sub>NFCl [M]<sup>+</sup>: 257.0402; found: 275.0406.

**(Z)-4-(2-(4-Bromophenyl)-1-fluorovinyl)benzonitrile (2f)**

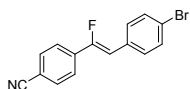

White solid, 43.9 mg, 73%; <sup>1</sup>H NMR (400 MHz, Chloroform-*d*)  $\delta$ : 7.73 – 7.68 (m, 4H), 7.51 (brs, 4H), 6.38 (d,  $J = 38.4$  Hz, 1H). <sup>19</sup>F NMR (376 MHz, Chloroform-*d*)  $\delta$ : -98.8 (d,  $J = 20.8$  Hz), -114.8 (d,  $J = 38.6$  Hz). <sup>13</sup>C NMR (100 MHz, Chloroform-*d*)  $\delta$ : 155.6 (d,  $J = 259.1$  Hz), 136.7 (d,  $J = 28.1$  Hz), 132.5 (d,  $J = 2.3$  Hz), 131.9, 131.6 (d,  $J = 3.2$  Hz), 130.8 (d,  $J = 8.3$  Hz), 124.6 (d,  $J = 7.7$  Hz), 122.3 (d,  $J = 3.7$  Hz), 118.4 (CN), 112.5, 108.1 (d,  $J = 10.1$  Hz). HRMS (EI<sup>+</sup>) calcd. for C<sub>15</sub>H<sub>9</sub>NFBr [M]<sup>+</sup>: 300.9897; found: 300.9903.

**(Z)-4-(2-(3-Bromophenyl)-1-fluorovinyl)benzonitrile (2g)**

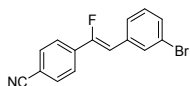

White solid, 46.9 mg, 78%; <sup>1</sup>H NMR (400 MHz, Chloroform-*d*)  $\delta$ : 7.82 (t,  $J = 1.8$  Hz, 1H), 7.74 – 7.69 (m, 4H), 7.55 (dt,  $J = 7.8, 1.3$  Hz, 1H), 7.45-7.43 (m, 1H), 7.28 – 7.24 (m, 1H), 6.37 (d,  $J = 38.2$  Hz, 1H). <sup>19</sup>F NMR (376 MHz, Chloroform-*d*)  $\delta$ : -98.4 (d,  $J = 20.6$  Hz), -113.8 (d,  $J = 38.2$  Hz). <sup>13</sup>C NMR (100 MHz, Chloroform-*d*)  $\delta$ : 156.0 (d,  $J = 260.1$  Hz), 136.5 (d,  $J = 28.3$  Hz), 134.7 (d,  $J = 3.3$  Hz), 132.5 (d,  $J = 2.3$  Hz), 132.0 (d,  $J = 9.0$  Hz), 131.2 (d,  $J = 2.4$  Hz), 130.2, 127.8 (d,  $J = 7.9$  Hz), 124.8 (d,  $J = 7.7$  Hz), 122.8, 118.4, 112.7, 107.8 (d,  $J = 9.9$  Hz). HRMS (EI<sup>+</sup>) calcd. for C<sub>15</sub>H<sub>9</sub>NFBr [M]<sup>+</sup>: 300.9897; found: 300.9901.

**(Z)-4-(1-Fluoro-2-(4-iodophenyl)vinyl)benzonitrile (2h)**

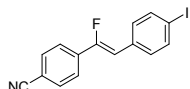

White solid, 50.2 mg, 72%; <sup>1</sup>H NMR (400 MHz, Chloroform-*d*)  $\delta$ : 7.73 – 7.68 (m, 6H), 7.39 – 7.26 (m, 2H), 6.37 (d,  $J = 38.5$  Hz, 1H). <sup>19</sup>F NMR (376 MHz, Chloroform-*d*)  $\delta$ : -98.6 (d,  $J = 20.7$  Hz), -114.4 (d,  $J = 38.4$  Hz). <sup>13</sup>C NMR (150 MHz, Chloroform-*d*)  $\delta$ : 155.8 (d,  $J = 259.3$  Hz), 137.9, 136.6 (d,  $J = 28.2$

Hz), 132.5 (d,  $J = 2.2$  Hz), 132.1 (d,  $J = 3.1$  Hz), 130.9 (d,  $J = 8.3$  Hz), 124.7 (d,  $J = 7.3$  Hz), 118.5 (CN), 112.5, 108.2 (d,  $J = 10.0$  Hz), 94.0 (d,  $J = 3.8$  Hz). HRMS (EI<sup>+</sup>) calcd. for C<sub>15</sub>H<sub>9</sub>NFI [M]<sup>+</sup>: 348.9758; found: 348.9764.

**(Z)-4-(1-fluoro-2-phenylvinyl)benzonitrile (2i)**

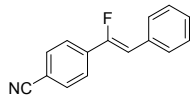

White solid, 31.2 mg, 70%; <sup>1</sup>H NMR (400 MHz, Chloroform-*d*)  $\delta$ : 7.75 – 7.65 (m, 6H), 7.43-7.39 (m, 2H), 7.37 – 7.29 (m, 1H), 6.46 (d,  $J = 39.0$  Hz, 1H). <sup>19</sup>F NMR (376 MHz, Chloroform-*d*)  $\delta$ : -116.0 (d,  $J = 38.9$  Hz). <sup>13</sup>C NMR (100 MHz, Chloroform-*d*)  $\delta$ : 155.2 (d,  $J = 258.3$  Hz), 137.0 (d,  $J = 28.4$  Hz), 132.7 (d,  $J = 3.3$  Hz), 132.4 (d,  $J = 2.3$  Hz), 129.4 (d,  $J = 8.1$  Hz), 128.8, 128.3 (d,  $J = 2.6$  Hz), 124.6 (d,  $J = 7.6$  Hz), 118.5 (CN), 112.2, 109.2 (d,  $J = 10.1$  Hz). HRMS (EI<sup>+</sup>) calcd. for C<sub>15</sub>H<sub>10</sub>NF [M]<sup>+</sup>: 223.0792; found: 223.0798.

**(Z)-4-(1-fluoro-2-(naphthalen-2-yl)vinyl)benzonitrile (2j)**

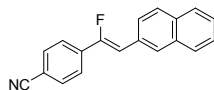

White solid, 43.6 mg, 80%; <sup>1</sup>H NMR (400 MHz, Chloroform-*d*)  $\delta$ : 8.05 (d,  $J = 1.6$  Hz, 1H), 7.83 – 7.77 (m, 4H), 7.68 (d,  $J = 8.6$  Hz, 2H), 7.63 (d,  $J = 8.5$  Hz, 2H), 7.48 (dt,  $J = 6.3, 3.2$  Hz, 2H), 6.54 (d,  $J = 39.0$  Hz, 1H). <sup>19</sup>F NMR (376 MHz, Chloroform-*d*)  $\delta$ : -115.8 (d,  $J = 39.1$  Hz). <sup>13</sup>C NMR (100 MHz, Chloroform-*d*)  $\delta$ : 155.4 (d,  $J = 258.3$  Hz), 137.0 (d,  $J = 28.3$  Hz), 133.4, 133.0 (d,  $J = 2.1$  Hz), 132.4 (d,  $J = 2.3$  Hz), 130.3 (d,  $J = 3.5$  Hz), 129.0 (d,  $J = 8.2$  Hz), 128.4, 128.3, 127.7, 126.7, 126.7 (d,  $J = 3.1$  Hz), 126.5, 124.5 (d,  $J = 7.7$  Hz), 118.6 (CN), 112.2, 109.3 (d,  $J = 9.9$  Hz). HRMS (EI<sup>+</sup>) calcd. for C<sub>19</sub>H<sub>12</sub>NF [M]<sup>+</sup>: 273.0948; found: 273.0954.

**(Z)-4-(2-([1,1'-Biphenyl]-4-yl)-1-fluorovinyl)benzonitrile (2k)**

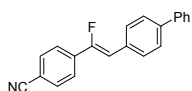

White solid, 48.4 mg, 81%; <sup>1</sup>H NMR (400 MHz, Chloroform-*d*)  $\delta$ : 7.77 – 7.70 (m, 6H), 7.66 – 7.63 (m, 4H), 7.48-7.45 (m, 2H), 7.39 – 7.36 (m, 1H), 6.50 (d,  $J = 39.0$  Hz, 1H). <sup>19</sup>F NMR (376 MHz, Chloroform-*d*)  $\delta$ : -99.9 (d,  $J = 21.3$  Hz), -115.8 (d,  $J = 39.0$  Hz). <sup>13</sup>C NMR (100 MHz, Chloroform-*d*)  $\delta$ : 155.3 (d,  $J = 258.2$  Hz), 140.9 (d,  $J = 2.8$  Hz), 140.3, 137.0 (d,  $J = 28.4$  Hz), 132.5 (d,  $J = 2.3$  Hz), 131.7 (d,  $J = 3.4$  Hz), 129.8 (d,  $J = 8.1$  Hz), 128.9, 127.7, 127.4, 127.0, 124.5 (d,  $J = 7.6$  Hz), 118.6 (CN), 112.2, 108.9 (d,  $J = 10.2$  Hz). HRMS (EI<sup>+</sup>) calcd. for C<sub>21</sub>H<sub>14</sub>NF [M]<sup>+</sup>: 299.1105; found: 299.1109.

**(Z)-4-(1-Fluoro-2-(*p*-tolyl)vinyl)benzonitrile (2l)**

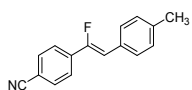

White solid, 35.1 mg, 74%; <sup>1</sup>H NMR (400 MHz, Chloroform-*d*)  $\delta$ : 7.73 – 7.67 (m, 4H), 7.55 (d,  $J = 8.2$

Hz, 2H), 7.21 (d,  $J = 8.0$  Hz, 2H), 6.42 (d,  $J = 39.2$  Hz, 1H), 2.38 (s, 3H).  $^{19}\text{F}$  NMR (376 MHz, Chloroform- $d$ )  $\delta$ : -117.1 (d,  $J = 39.3$  Hz).  $^{13}\text{C}$  NMR (100 MHz, Chloroform- $d$ )  $\delta$ : 154.6 (d,  $J = 256.5$  Hz), 138.5 (d,  $J = 2.7$  Hz), 137.2 (d,  $J = 28.3$  Hz), 132.4 (d,  $J = 2.5$  Hz), 129.9 (d,  $J = 3.2$  Hz), 129.5, 129.3 (d,  $J = 8.0$  Hz), 124.4 (d,  $J = 7.7$  Hz), 118.6 (CN), 111.9, 109.2 (d,  $J = 10.2$  Hz), 21.4. HRMS ( $\text{EI}^+$ ) calcd. for  $\text{C}_{16}\text{H}_{12}\text{NF}$  [ $\text{M}]^+$ : 237.0948; found: 237.0949.

#### (Z)-4-(1-Fluoro-2-(4-methoxyphenyl)vinyl)benzonitrile (2m)

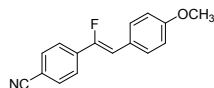

White solid, 38.0 mg, 75%;  $^1\text{H}$  NMR (400 MHz, Chloroform- $d$ )  $\delta$ : 7.72 – 7.66 (m, 4H), 7.62 – 7.60 (m, 2H), 6.95 – 6.92 (m, 2H), 6.41 (d,  $J = 39.3$  Hz, 1H), 3.85 (s, 3H).  $^{19}\text{F}$  NMR (376 MHz, Chloroform- $d$ )  $\delta$ : -102.7 (d,  $J = 21.6$  Hz), -119.1 (d,  $J = 39.4$  Hz).  $^{13}\text{C}$  NMR (150 MHz, Chloroform- $d$ )  $\delta$ : 159.6, 153.9 (d,  $J = 255.4$  Hz), 137.3 (d,  $J = 28.4$  Hz), 132.4 (d,  $J = 2.2$  Hz), 130.8 (d,  $J = 8.3$  Hz), 125.4 (d,  $J = 3.3$  Hz), 124.2 (d,  $J = 7.7$  Hz), 118.7 (CN), 114.2, 111.6, 108.8 (d,  $J = 10.5$  Hz), 55.3. HRMS ( $\text{EI}^+$ ) calcd. for  $\text{C}_{16}\text{H}_{12}\text{ONF}$  [ $\text{M}]^+$ : 253.0897; found: 253.0904.

#### (Z)-4-(1-Fluoro-2-(naphthalen-1-yl)vinyl)benzonitrile (2n)

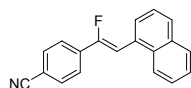

White solid, 42.5 mg, 78%;  $^1\text{H}$  NMR (400 MHz, Chloroform- $d$ )  $\delta$ : 8.07 (d,  $J = 8.5$  Hz, 1H), 7.95 (d,  $J = 7.3$  Hz, 1H), 7.91 – 7.83 (m, 4H), 7.74 (d,  $J = 8.4$  Hz, 2H), 7.59 – 7.52 (m, 3H), 7.16 (d,  $J = 36.3$  Hz, 1H).  $^{19}\text{F}$  NMR (376 MHz, Chloroform- $d$ )  $\delta$ : -102.4 (d,  $J = 20.7$  Hz), -116.6 (d,  $J = 36.1$  Hz).  $^{13}\text{C}$  NMR (100 MHz, Chloroform- $d$ )  $\delta$ : 155.8 (d,  $J = 257.5$  Hz), 137.0 (d,  $J = 28.8$  Hz), 133.7, 132.5 (d,  $J = 2.4$  Hz), 131.5, 128.9, 128.9, 128.6 (d,  $J = 2.2$  Hz), 127.9 (d,  $J = 10.0$  Hz), 126.6, 126.0, 125.6, 124.8 (d,  $J = 7.4$  Hz), 123.7, 118.6 (CN), 112.4, 105.7 (d,  $J = 11.6$  Hz). HRMS ( $\text{EI}^+$ ) calcd. for  $\text{C}_{19}\text{H}_{12}\text{NF}$  [ $\text{M}]^+$ : 273.0948; found: 273.0952.

#### 4-((1Z, 3E)-1-Fluoro-4-phenylbuta-1,3-dien-1-yl)benzonitrile (2o)

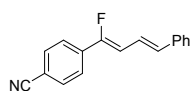

White solid, 37.3 mg, 75%;  $^1\text{H}$  NMR (400 MHz, Chloroform- $d$ )  $\delta$ : 7.69-7.64 (m, 4H), 7.49 (d,  $J = 7.3$  Hz, 2H), 7.39 – 7.33 (m, 2H), 7.32 – 7.27 (m, 1H), 7.26 – 7.19 (m, 1H), 6.76 (d,  $J = 15.8$  Hz, 1H), 6.41 (ddd,  $J = 34.1, 11.0, 0.8$  Hz, 1H).  $^{19}\text{F}$  NMR (376 MHz, Chloroform- $d$ )  $\delta$ : -103.2 (d,  $J = 19.9$  Hz), -119.4 (d,  $J = 34.5$  Hz).  $^{13}\text{C}$  NMR (100 MHz, Chloroform- $d$ )  $\delta$ : 154.9 (d,  $J = 255.0$  Hz), 136.8 (d,  $J = 1.7$  Hz), 136.1 (d,  $J = 27.9$  Hz), 134.9 (d,  $J = 3.8$  Hz), 132.4 (d,  $J = 2.6$  Hz), 128.8, 128.4, 126.8, 124.2 (d,  $J = 7.5$  Hz), 120.2 (d,  $J = 5.2$  Hz), 118.6 (CN), 111.9, 110.4 (d,  $J = 13.8$  Hz). HRMS ( $\text{EI}^+$ ) calcd. for  $\text{C}_{17}\text{H}_{12}\text{NF}$  [ $\text{M}]^+$ : 249.0948; found: 249.0950.

#### (Z)-4-(1-Fluoropent-1-en-1-yl)benzonitrile (2p)

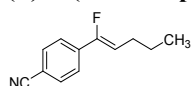

Colorless oil, 25.7 mg, 68%;  $^1\text{H}$  NMR (400 MHz, Chloroform-*d*)  $\delta$ : 7.64 (d,  $J$  = 8.4 Hz, 2H), 7.58 (d,  $J$  = 8.5 Hz, 2H), 5.59 (dt,  $J$  = 36.8, 7.7 Hz, 1H), 2.30 (qd,  $J$  = 7.5, 1.9 Hz, 2H), 1.55-1.46 (m, 2H), 0.98 (t,  $J$  = 7.4 Hz, 3H).  $^{19}\text{F}$  NMR (376 MHz, Chloroform-*d*)  $\delta$ : -105.3 (d,  $J$  = 22.6 Hz), -122.3 (d,  $J$  = 36.8 Hz).  $^{13}\text{C}$  NMR (150 MHz, Chloroform-*d*)  $\delta$ : 155.1 (d,  $J$  = 245.8 Hz), 136.9 (d,  $J$  = 29.6 Hz), 132.3 (d,  $J$  = 2.3 Hz), 124.2 (d,  $J$  = 7.2 Hz), 118.7 (CN), 111.6, 110.2 (d,  $J$  = 17.4 Hz), 26.3 (d,  $J$  = 4.4 Hz), 22.4, 13.8. HRMS (EI $^+$ ) calcd. for  $\text{C}_{12}\text{H}_{12}\text{NF}$  [ $\text{M}$ ] $^+$ : 189.0948; found: 189.0951.

#### (*Z*)-4-(1-Fluorooct-1-en-1-yl)benzonitrile (2q)

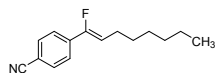

Colorless oil, 33.2 mg, 72%;  $^1\text{H}$  NMR (400 MHz, Chloroform-*d*)  $\delta$ : 7.64 (d,  $J$  = 8.3 Hz, 2H), 7.58 (d,  $J$  = 8.3 Hz, 2H), 5.59 (dt,  $J$  = 36.7, 7.6 Hz, 1H), 2.31 (qd,  $J$  = 7.5, 1.9 Hz, 2H), 1.50-1.43 (m, 2H), 1.39 – 1.25 (m, 7H), 0.89 (t,  $J$  = 6.8 Hz, 3H).  $^{19}\text{F}$  NMR (376 MHz, Chloroform-*d*)  $\delta$ : -105.5 (d,  $J$  = 22.9 Hz), -122.4 (d,  $J$  = 36.8 Hz).  $^{13}\text{C}$  NMR (150 MHz, Chloroform-*d*)  $\delta$ : 155.0 (d,  $J$  = 245.3 Hz), 136.9 (d,  $J$  = 29.6 Hz), 132.3 (d,  $J$  = 2.3 Hz), 124.2 (d,  $J$  = 6.9 Hz), 118.7 (CN), 111.6, 110.5 (d,  $J$  = 17.5 Hz), 31.6, 29.1, 29.0, 24.4 (d,  $J$  = 4.5 Hz), 22.6, 14.1. HRMS (EI $^+$ ) calcd. for  $\text{C}_{15}\text{H}_{18}\text{NF}$  [ $\text{M}$ ] $^+$ : 231.1418; found: 231.1419.

#### 4-(1-Fluorovinyl)benzonitrile (2r)<sup>3</sup>

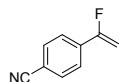

Colorless oil, 15.2 mg, 52%;  $^1\text{H}$  NMR (400 MHz, Chloroform-*d*)  $\delta$ : 7.70 – 7.64 (m, 4H), 5.27 – 5.03 (m, 2H).  $^{19}\text{F}$  NMR (376 MHz, Chloroform-*d*)  $\delta$ : -108.9 (dd,  $J$  = 48.7, 17.3 Hz).  $^{13}\text{C}$  NMR (150 MHz, Chloroform-*d*)  $\delta$ : 159.5 (d,  $J$  = 263.7 Hz), 138.4, 132.3, 131.9 (d,  $J$  = 27.1 Hz), 130.0, 129.3 (d,  $J$  = 8.6 Hz), 128.8, 124.7 (d,  $J$  = 7.5 Hz), 119.0 (CN), 110.3, 104.4 (d,  $J$  = 9.9 Hz).

#### (*Z*)-4,4'-(1-Fluoroethene-1,2-diyl)bis(nitrobenzene) (2s)

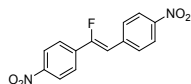

Yellow solid, 47.9 mg, 83%;  $^1\text{H}$  NMR (400 MHz, Chloroform-*d*)  $\delta$ : 8.32 (d,  $J$  = 8.6 Hz, 2H), 8.30 – 8.24 (m, 2H), 7.92 – 7.79 (m, 4H), 6.58 (d,  $J$  = 37.4 Hz, 1H).  $^{19}\text{F}$  NMR (376 MHz, Chloroform-*d*)  $\delta$ : -109.7 (d,  $J$  = 37.5 Hz).  $^{13}\text{C}$  NMR (150 MHz, Chloroform-*d*)  $\delta$ : 157.4 (d,  $J$  = 263.9 Hz), 148.4, 147.0 (d,  $J$  = 3.1 Hz), 139.0 (d,  $J$  = 3.4 Hz), 137.6 (d,  $J$  = 27.6 Hz), 129.9 (d,  $J$  = 8.8 Hz), 125.5 (d,  $J$  = 7.7 Hz), 124.2 (d,  $J$  = 2.1 Hz), 124.1, 107.8 (d,  $J$  = 9.4 Hz). HRMS (EI $^+$ ) calcd. for  $\text{C}_{14}\text{H}_9\text{O}_4\text{N}_2\text{F}$  [ $\text{M}$ ] $^+$ : 288.0541; found: 288.0545.

#### (*Z*)-1-Bromo-3-(2-fluoro-2-(4-nitrophenyl)vinyl)benzene (2t)

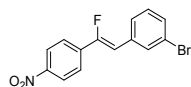

Yellow solid, 49.3 mg, 77%;  $^1\text{H}$  NMR (400 MHz, Chloroform-*d*)  $\delta$ : 8.29 (d,  $J$  = 8.8 Hz, 2H), 7.85 (t,  $J$  = 1.9 Hz, 1H), 7.83 – 7.75 (m, 2H), 7.58 (dt,  $J$  = 7.8, 1.3 Hz, 1H), 7.46 (ddd,  $J$  = 8.0, 2.0, 1.0 Hz, 1H), 7.30 (d,  $J$  = 7.9 Hz, 1H), 6.45 (d,  $J$  = 38.1 Hz, 1H).  $^{19}\text{F}$  NMR (376 MHz, Chloroform-*d*)  $\delta$ : -113.2 (d,  $J$



= 38.1 Hz).  $^{13}\text{C}$  NMR (100 MHz, Chloroform-*d*)  $\delta$ : 155.8 (d,  $J = 260.1$  Hz), 147.9, 138.3 (d,  $J = 28.1$  Hz), 134.6 (d,  $J = 3.3$  Hz), 132.1 (d,  $J = 9.1$  Hz), 131.4 (d,  $J = 2.4$  Hz), 130.2, 127.9 (d,  $J = 8.0$  Hz), 125.0 (d,  $J = 7.6$  Hz), 124.1 (d,  $J = 2.3$  Hz), 122.9, 108.5 (d,  $J = 9.9$  Hz). HRMS (EI<sup>+</sup>) calcd. for  $\text{C}_{14}\text{H}_9\text{O}_2\text{NFBBr} [\text{M}]^+$ : 320.9795; found: 320.9802.

**(Z)-1-(2-Fluoro-2-(4-nitrophenyl)vinyl)-4-methylbenzene (2u)**

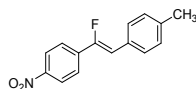

Yellow solid, 38.1 mg, 74%;  $^1\text{H}$  NMR (400 MHz, Chloroform-*d*)  $\delta$ : 8.26 (d,  $J = 8.7$  Hz, 2H), 7.77 (d,  $J = 9.0$  Hz, 2H), 7.57 (d,  $J = 8.0$  Hz, 2H), 7.22 (d,  $J = 7.8$  Hz, 2H), 6.49 (d,  $J = 39.1$  Hz, 1H), 2.39 (s, 3H).  $^{19}\text{F}$  NMR (376 MHz, Chloroform-*d*)  $\delta$ : -101.5 (d,  $J = 21.6$  Hz), -116.5 (d,  $J = 39.0$  Hz).  $^{13}\text{C}$  NMR (100 MHz, Chloroform-*d*)  $\delta$ : 154.5 (d,  $J = 256.7$  Hz), 147.5, 139.0 (d,  $J = 28.1$  Hz), 138.7 (d,  $J = 2.6$  Hz), 129.8 (d,  $J = 3.3$  Hz), 129.5, 129.4 (d,  $J = 8.1$  Hz), 124.6 (d,  $J = 7.5$  Hz), 124.0 (d,  $J = 2.3$  Hz), 110.0 (d,  $J = 10.2$  Hz), 21.4. HRMS (EI<sup>+</sup>) calcd. for  $\text{C}_{15}\text{H}_{12}\text{O}_2\text{NF} [\text{M}]^+$ : 257.0847; found: 257.0850.

**Ethyl (Z)-4-(2-(4-cyanophenyl)-1-fluorovinyl)benzoate (2v)**

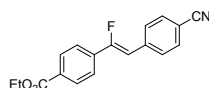

White solid, 41.0 mg, 69%;  $^1\text{H}$  NMR (400 MHz, Chloroform-*d*)  $\delta$ : 8.11 (d,  $J = 8.3$  Hz, 2H), 7.75 – 7.72 (m, 4H), 7.67 (d,  $J = 8.5$  Hz, 2H), 6.45 (d,  $J = 38.0$  Hz, 1H), 4.41 (q,  $J = 7.1$  Hz, 2H), 1.42 (t,  $J = 7.1$  Hz, 3H).  $^{19}\text{F}$  NMR (376 MHz, Chloroform-*d*)  $\delta$ : -91.8 (d,  $J = 20.1$  Hz), -109.9 (d,  $J = 38.0$  Hz).  $^{13}\text{C}$  NMR (100 MHz, Chloroform-*d*)  $\delta$ : 165.8, 158.4 (d,  $J = 263.5$  Hz), 137.7 (d,  $J = 3.2$  Hz), 136.0, 132.4, 131.5, 130.0 (d,  $J = 2.1$  Hz), 129.5 (d,  $J = 8.6$  Hz), 124.5 (d,  $J = 7.7$  Hz), 118.8 (CN), 110.9 (d,  $J = 3.1$  Hz), 106.4 (d,  $J = 9.7$  Hz), 61.3, 14.3. HRMS (EI<sup>+</sup>) calcd. for  $\text{C}_{18}\text{H}_{14}\text{O}_2\text{NF} [\text{M}]^+$ : 295.1003; found: 295.1006.

**(Z)-4-(2-Fluoro-2-(4-(trifluoromethyl)phenyl)vinyl)benzonitrile (2w)**

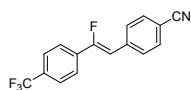

White solid, 44.2 mg, 76%;  $^1\text{H}$  NMR (400 MHz, Chloroform-*d*)  $\delta$ : 7.79 – 7.66 (m, 8H), 6.43 (d,  $J = 38.0$  Hz, 1H).  $^{19}\text{F}$  NMR (376 MHz, Chloroform-*d*)  $\delta$ : -62.8, -110.1 (d,  $J = 38.2$  Hz).  $^{13}\text{C}$  NMR (100 MHz, Chloroform-*d*)  $\delta$ : 157.9 (d,  $J = 263.4$  Hz), 137.5 (d,  $J = 2.9$  Hz), 135.3 (d,  $J = 27.4$  Hz), 132.4, 131.6 (q,  $J = 32.9$  Hz), 129.5 (d,  $J = 8.6$  Hz), 125.8 (dt,  $J = 6.1, 3.7$  Hz), 124.9 (d,  $J = 7.6$  Hz), 123.8 (q,  $J = 27.2$  Hz), 118.8 (CN), 111.0 (d,  $J = 3.2$  Hz), 106.5 (d,  $J = 9.6$  Hz). HRMS (EI<sup>+</sup>) calcd. for  $\text{C}_{16}\text{H}_9\text{NF}_4 [\text{M}]^+$ : 291.0666; found: 291.0670.

**(Z)-4-(2-(4-Chlorophenyl)-2-fluorovinyl)benzonitrile (2x)**

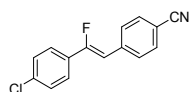

White solid, 37.1 mg, 72%;  $^1\text{H}$  NMR (400 MHz, Chloroform-*d*)  $\delta$ : 7.70 (d,  $J = 8.5$  Hz, 2H), 7.64 (d,  $J =$

8.5 Hz, 2H), 7.59 (d,  $J = 8.7$  Hz, 2H), 7.41 (d,  $J = 8.6$  Hz, 2H), 6.30 (d,  $J = 38.2$  Hz, 1H).  $^{19}\text{F}$  NMR (376 MHz, Chloroform- $d$ )  $\delta$ : -90.5 (d,  $J = 20.0$  Hz), -109.4 (d,  $J = 38.3$  Hz).  $^{13}\text{C}$  NMR (100 MHz, Chloroform- $d$ )  $\delta$ : 158.5 (d,  $J = 263.1$  Hz), 138.0 (d,  $J = 3.0$  Hz), 136.0, 132.4, 130.4 (d,  $J = 28.1$  Hz), 129.3 (d,  $J = 8.5$  Hz), 129.1 (d,  $J = 2.1$  Hz), 126.0 (d,  $J = 7.6$  Hz), 118.9 (CN), 110.6 (d,  $J = 3.2$  Hz), 104.9 (d,  $J = 9.9$  Hz). HRMS (EI $^+$ ) calcd. for  $\text{C}_{15}\text{H}_9\text{NFCI}$   $[\text{M}]^+$ : 257.0402; found: 257.0407.

#### (Z)-4-(2-(4-Bromophenyl)-2-fluorovinyl)benzonitrile (2y)

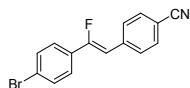

White solid, 47.6 mg, 79%;  $^1\text{H}$  NMR (400 MHz, Chloroform- $d$ )  $\delta$ : 7.71 (d,  $J = 8.5$  Hz, 2H), 7.65 (d,  $J = 8.5$  Hz, 2H), 7.58 (d,  $J = 8.6$  Hz, 2H), 7.54 – 7.52 (m, 2H), 6.32 (d,  $J = 38.2$  Hz, 1H).  $^{19}\text{F}$  NMR (376 MHz, Chloroform- $d$ )  $\delta$ : -90.9 (d,  $J = 20.2$  Hz), -109.6 (d,  $J = 38.2$  Hz).  $^{13}\text{C}$  NMR (100 MHz, Chloroform- $d$ )  $\delta$ : 158.5 (d,  $J = 263.1$  Hz), 137.9 (d,  $J = 3.2$  Hz), 132.4, 132.0 (d,  $J = 2.1$  Hz), 130.8 (d,  $J = 28.0$  Hz), 129.3 (d,  $J = 8.7$  Hz), 126.1 (d,  $J = 7.6$  Hz), 124.3, 118.9 (CN), 110.6 (d,  $J = 3.2$  Hz), 105.0 (d,  $J = 9.7$  Hz). HRMS (EI $^+$ ) calcd. for  $\text{C}_{15}\text{H}_9\text{NFBBr}$   $[\text{M}]^+$ : 300.9897; found: 300.9900.

#### (Z)-4-(2-Fluoro-2-phenylvinyl)benzonitrile (2z)

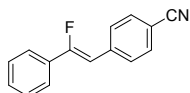

White solid, 36.1 mg, 81%;  $^1\text{H}$  NMR (400 MHz, Chloroform- $d$ )  $\delta$ : 7.72 – 7.62 (m, 6H), 7.45-7.42 (m, 3H), 6.32 (d,  $J = 38.4$  Hz, 1H).  $^{19}\text{F}$  NMR (376 MHz, Chloroform- $d$ )  $\delta$ : -109.0 (d,  $J = 38.5$  Hz).  $^{13}\text{C}$  NMR (150 MHz, Chloroform- $d$ )  $\delta$ : 159.5 (d,  $J = 263.7$  Hz), 138.4, 132.3, 131.9 (d,  $J = 27.1$  Hz), 130.0, 129.3 (d,  $J = 8.6$  Hz), 128.8, 124.7 (d,  $J = 7.5$  Hz), 119.0 (CN), 110.3, 104.4 (d,  $J = 9.9$  Hz). HRMS (EI $^+$ ) calcd. for  $\text{C}_{15}\text{H}_{10}\text{NF}$   $[\text{M}]^+$ : 223.0792; found: 223.0791.

#### 4,4'-(1-Fluoro-1-((trifluoromethyl)sulfonyl)ethane-1,2-diyl)bis(nitrobenzene) (1s-F)

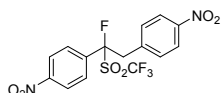

Pale yellow solid, 200.0 mg, 95%;  $^1\text{H}$  NMR (400 MHz, Chloroform- $d$ )  $\delta$ : 8.29 (d,  $J = 8.8$  Hz, 2H), 8.06 (d,  $J = 8.6$  Hz, 2H), 7.74 (d,  $J = 8.7$  Hz, 2H), 7.22 (d,  $J = 8.4$  Hz, 2H), 4.16-4.09 (m, 1H), 3.97-3.84 (m, 1H).  $^{19}\text{F}$  NMR (376 MHz, Chloroform- $d$ )  $\delta$ : -68.7 (d,  $J = 9.6$  Hz), -155.0 (dp,  $J = 39.6, 9.9$  Hz).  $^{13}\text{C}$  NMR (150 MHz, Chloroform- $d$ )  $\delta$ : 148.6 (d,  $J = 225.0$  Hz), 136.7, 135.0 (d,  $J = 20.8$  Hz), 131.6, 129.7 (d,  $J = 50.1$  Hz), 127.7 (d,  $J = 9.9$  Hz), 124.1 (d,  $J = 2.2$  Hz), 123.8, 120.0 (q,  $J = 332.3$  Hz), 110.5 (d,  $J = 232.8$  Hz), 38.7 (d,  $J = 19.4$  Hz). HRMS (ESI $^-$ ) calcd. for  $\text{C}_{15}\text{H}_9\text{O}_6\text{N}_2\text{F}_4\text{S}$   $[\text{M-H}]^-$ : 421.0123; found: 421.0111.

#### 1-(2-Fluoro-2-(4-nitrophenyl)-2-((trifluoromethyl)sulfonyl)ethyl)-4-methylbenzene (1u-F)

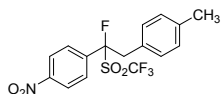

Pale yellow solid, 168.1 mg, 86%;  $^1\text{H}$  NMR (400 MHz, Chloroform-*d*)  $\delta$ : 8.25 (d,  $J$  = 8.6 Hz, 2H), 7.70 (d,  $J$  = 8.6 Hz, 2H), 6.96 (d,  $J$  = 7.8 Hz, 2H), 6.85 (d,  $J$  = 7.7 Hz, 2H), 4.00-3.93 (m, 1H), 3.80-3.66 (m, 1H), 2.23 (s, 3H).  $^{19}\text{F}$  NMR (376 MHz, Chloroform-*d*)  $\delta$ : -69.0 (d,  $J$  = 9.6 Hz), -154.8 (dp,  $J$  = 40.5, 9.9 Hz).  $^{13}\text{C}$  NMR (100 MHz, Chloroform-*d*)  $\delta$ : 149.1, 138.1, 135.8 (d,  $J$  = 20.8 Hz), 130.5, 129.4, 127.9 (d,  $J$  = 9.9 Hz), 126.0, 123.7 (d,  $J$  = 2.2 Hz), 120.1 (d,  $J$  = 332.4 Hz), 111.3 (d,  $J$  = 231.2 Hz), 38.5 (d,  $J$  = 19.5 Hz), 21.0. HRMS (ESI $^-$ ) calcd. for  $\text{C}_{16}\text{H}_{12}\text{O}_4\text{NF}_4\text{S}$  [M-H] $^-$ : 390.0429; found: 390.0423.

## 8. References

- (1) Y. Maekawa, M. Nambo, D. Yokogawa, C. M. Crudden, *J. Am. Chem. Soc.* **2020**, *142*, 15667-15672.
- (2) R.-Y. Yang, H. Wang, B. Xu, *Chem. Commun.* **2021**, *57*, 4831-4834.
- (3) Y. Su, M. Bai, J.-B. Qiao, X.-J. Li, R. Li, Y.-Q. Tu, P. Gu, *Tetrahedron Lett.* **2015**, *56*, 1805-1807.

## 9. Copies of NMR spectra

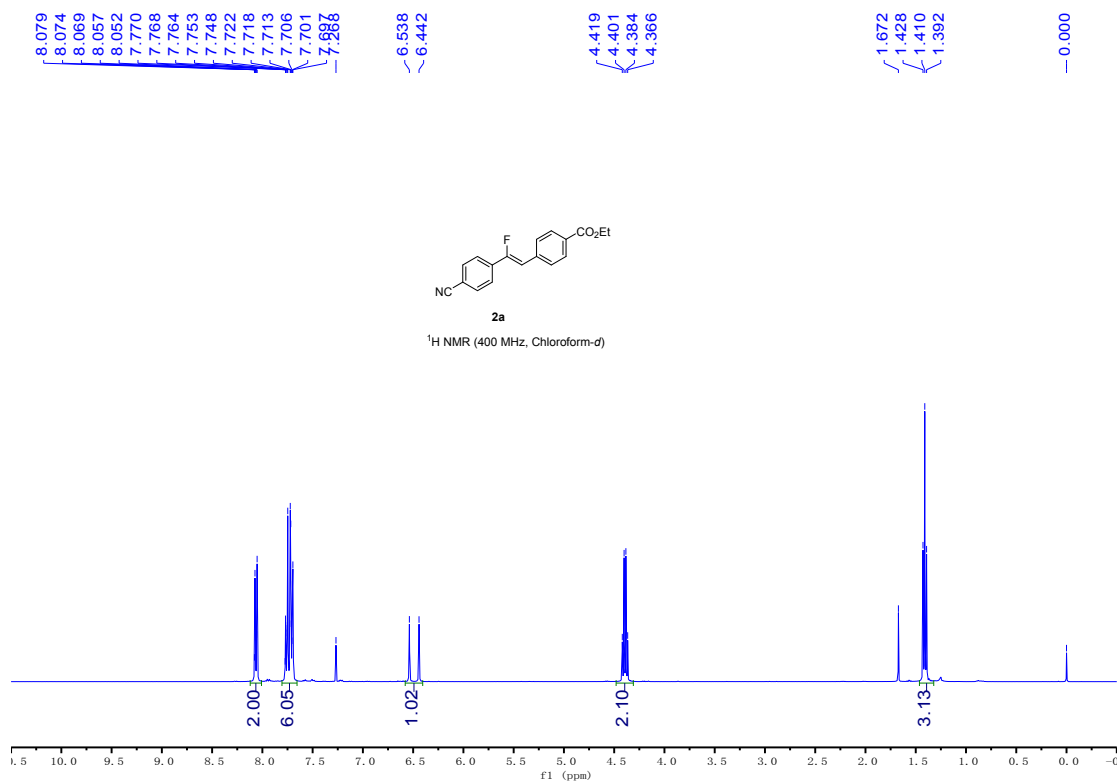

Figure S 1

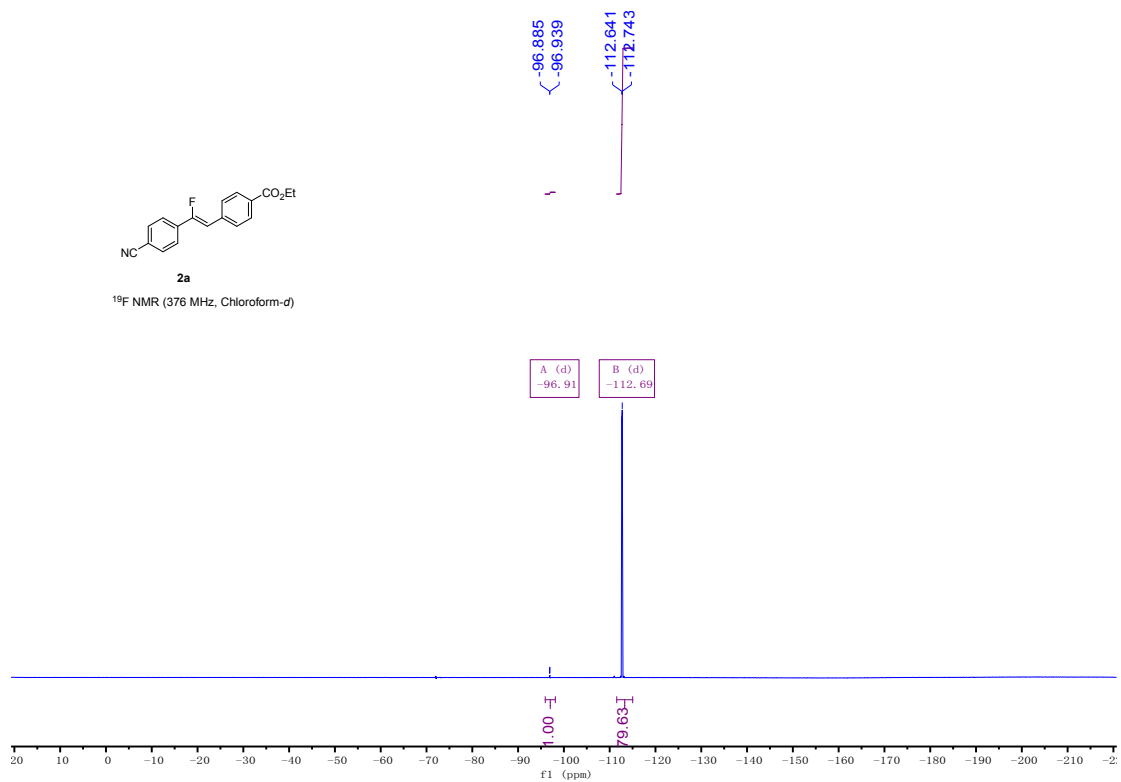

Figure S 2

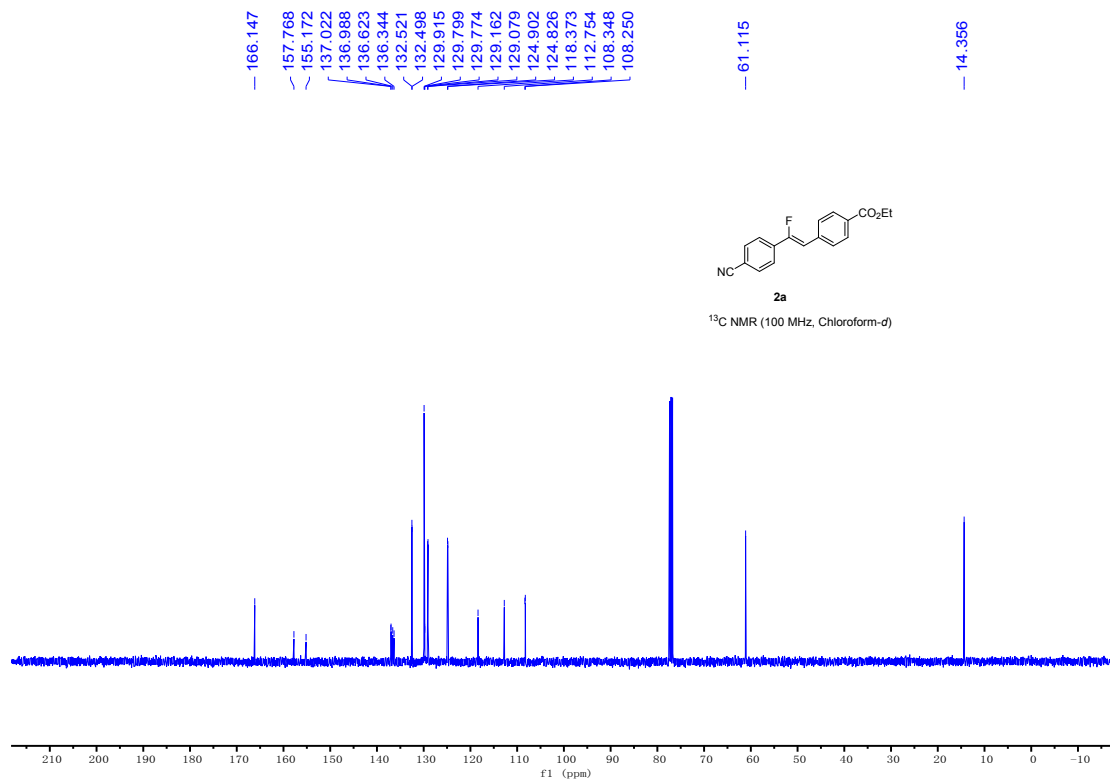

Figure S 3

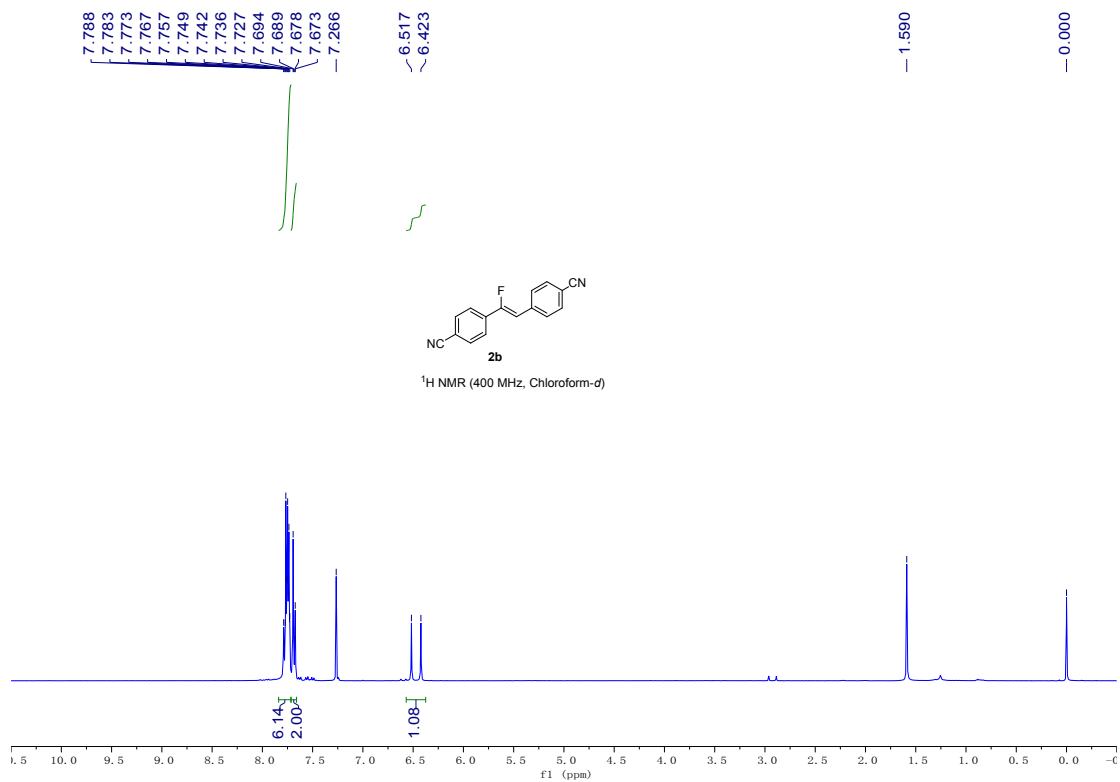

Figure S 4

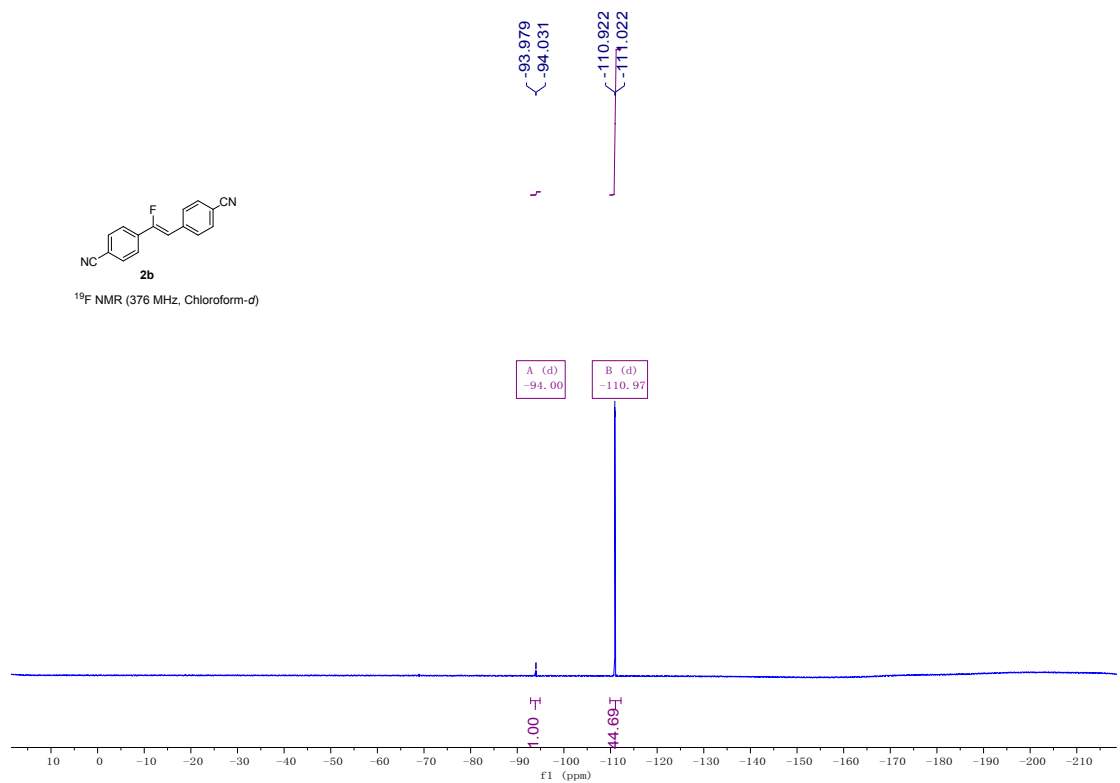

Figure S 5

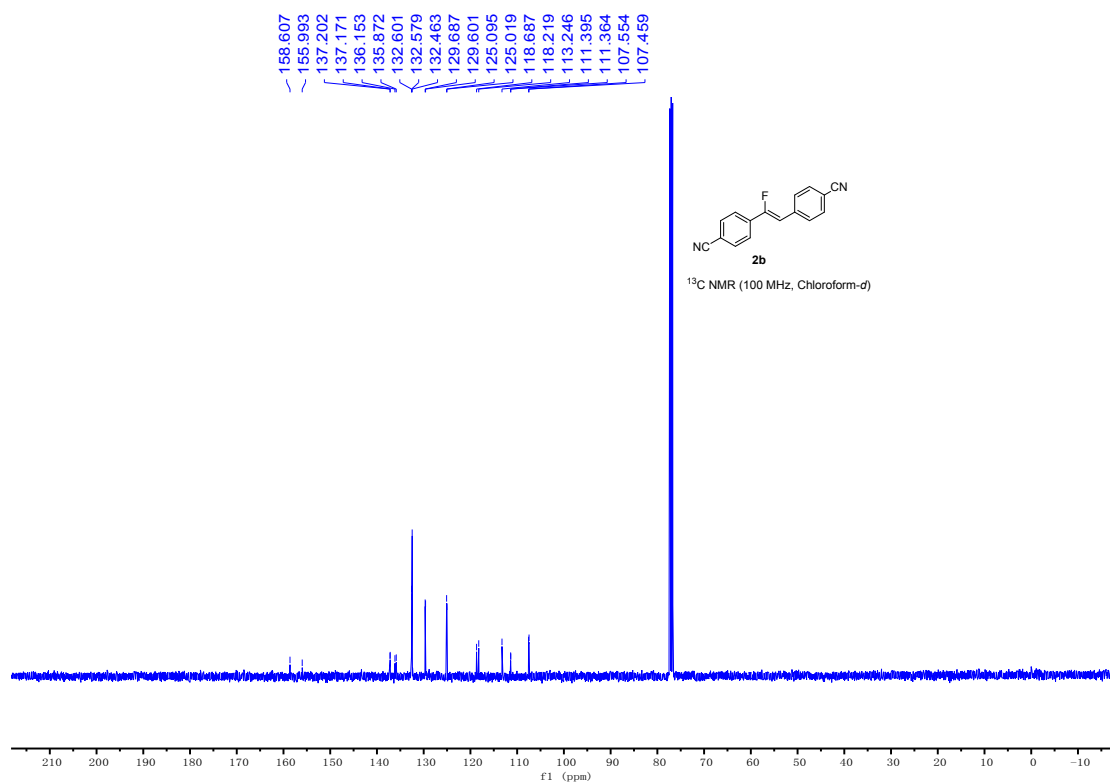

Figure S 6

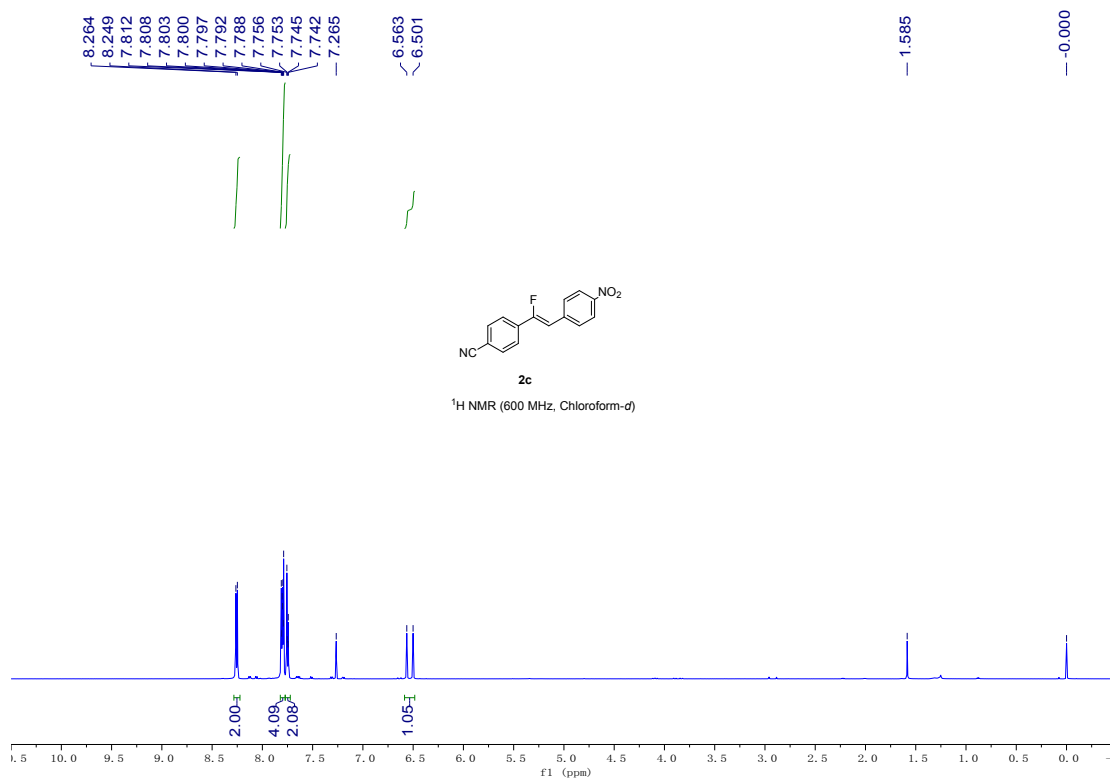

Figure S 7

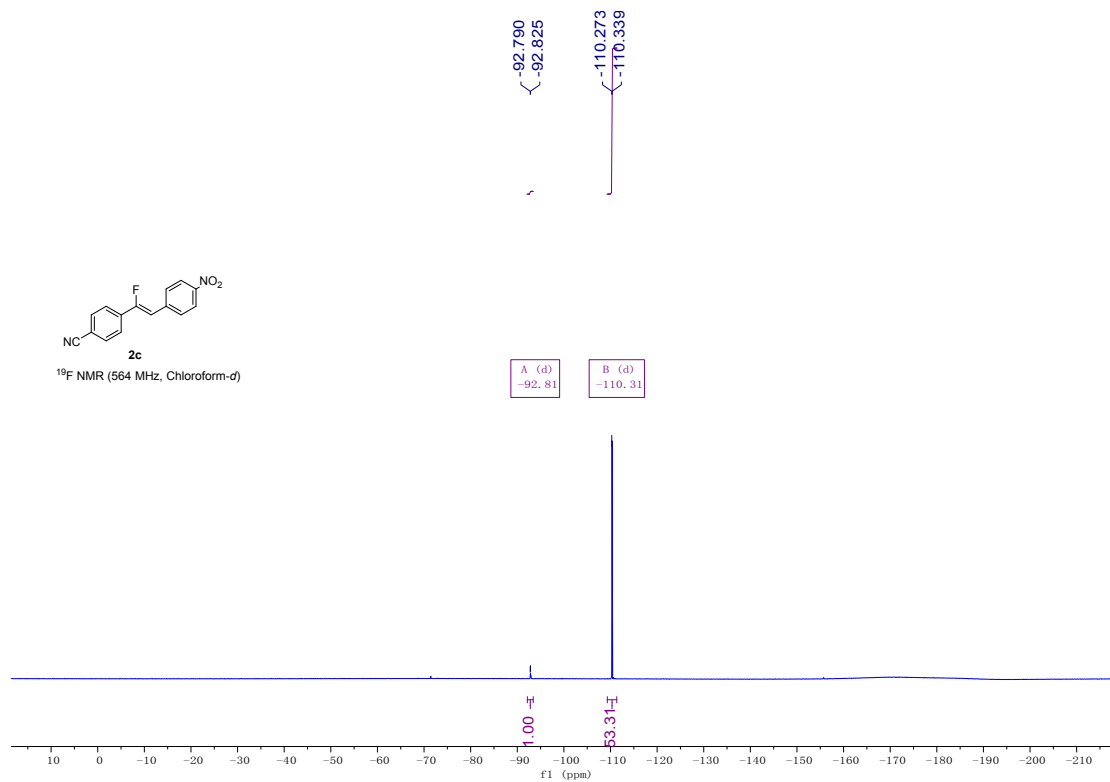

Figure S 8

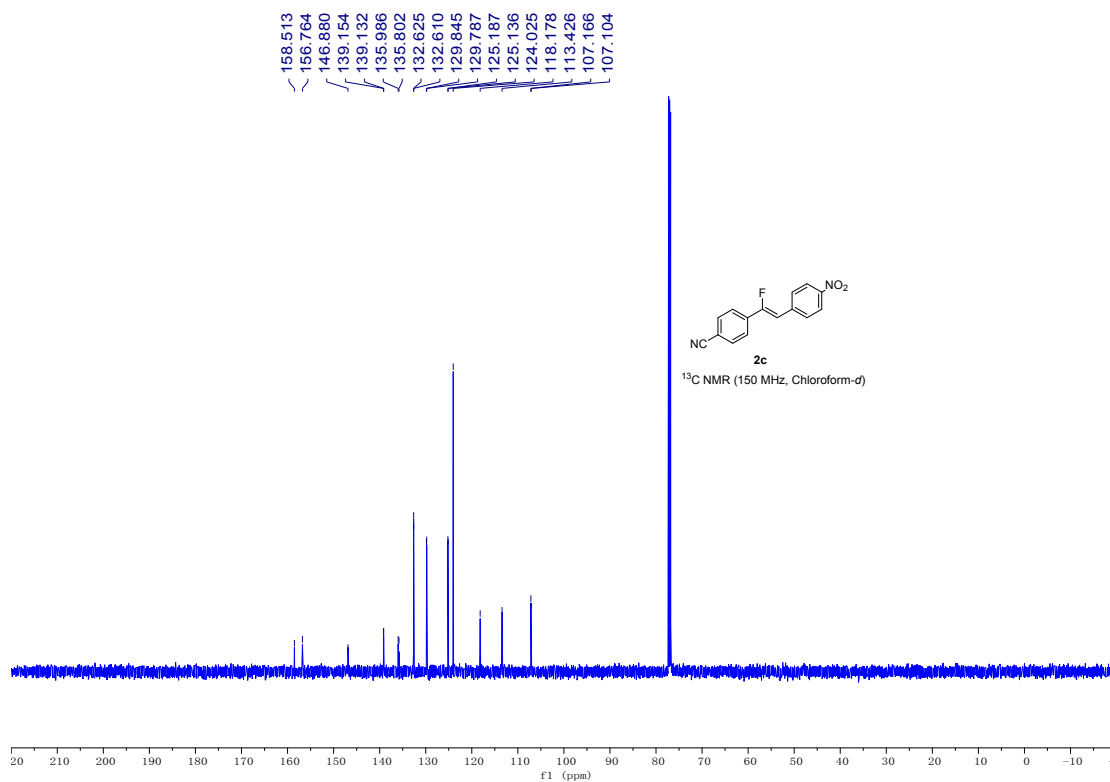

Figure S 9

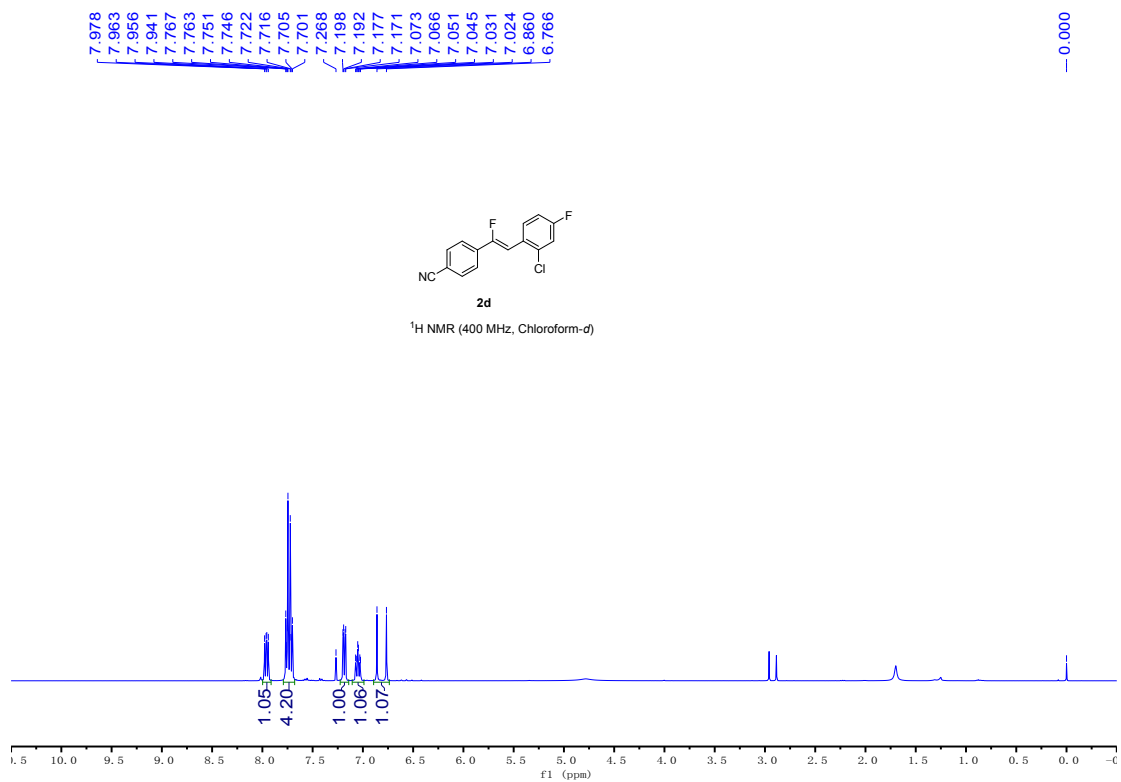

Figure S 10

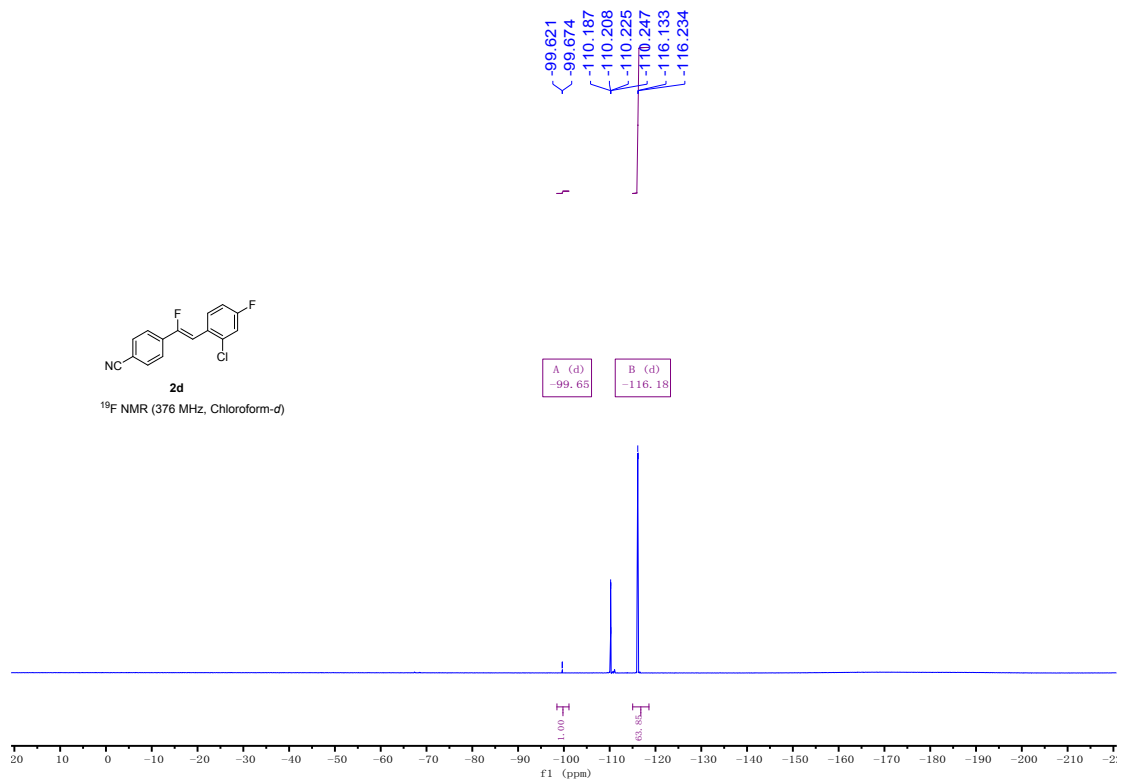

Figure S 11



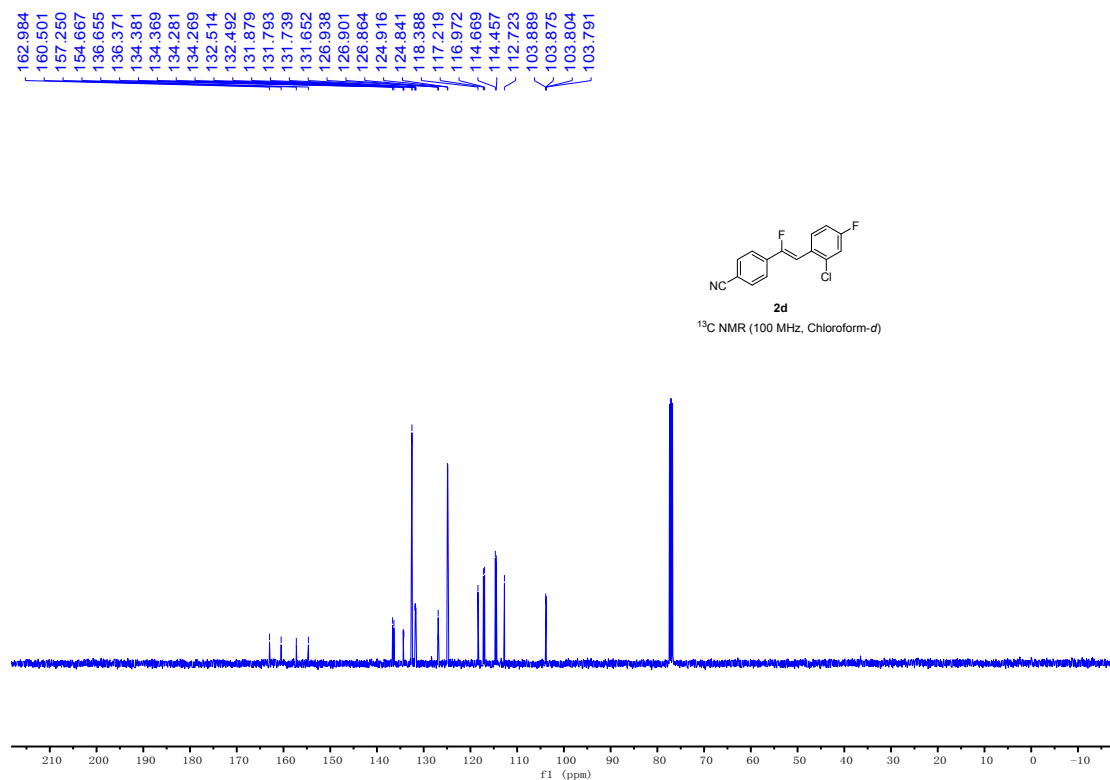

Figure S 12

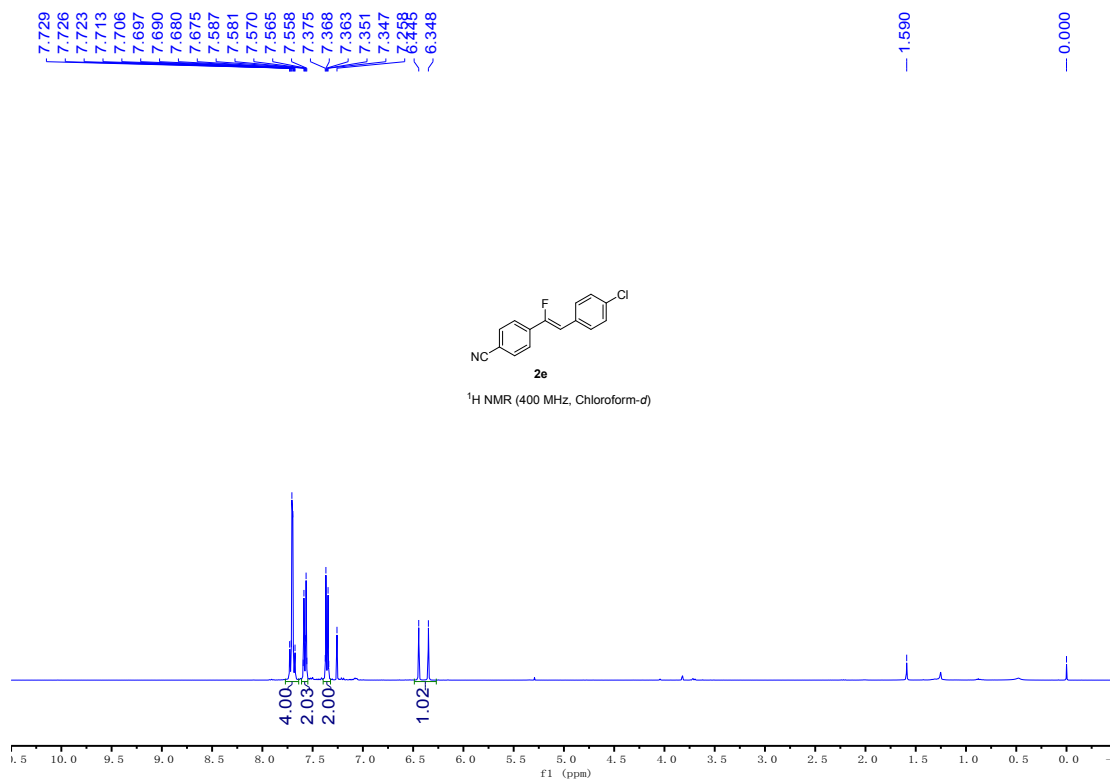

Figure S 13

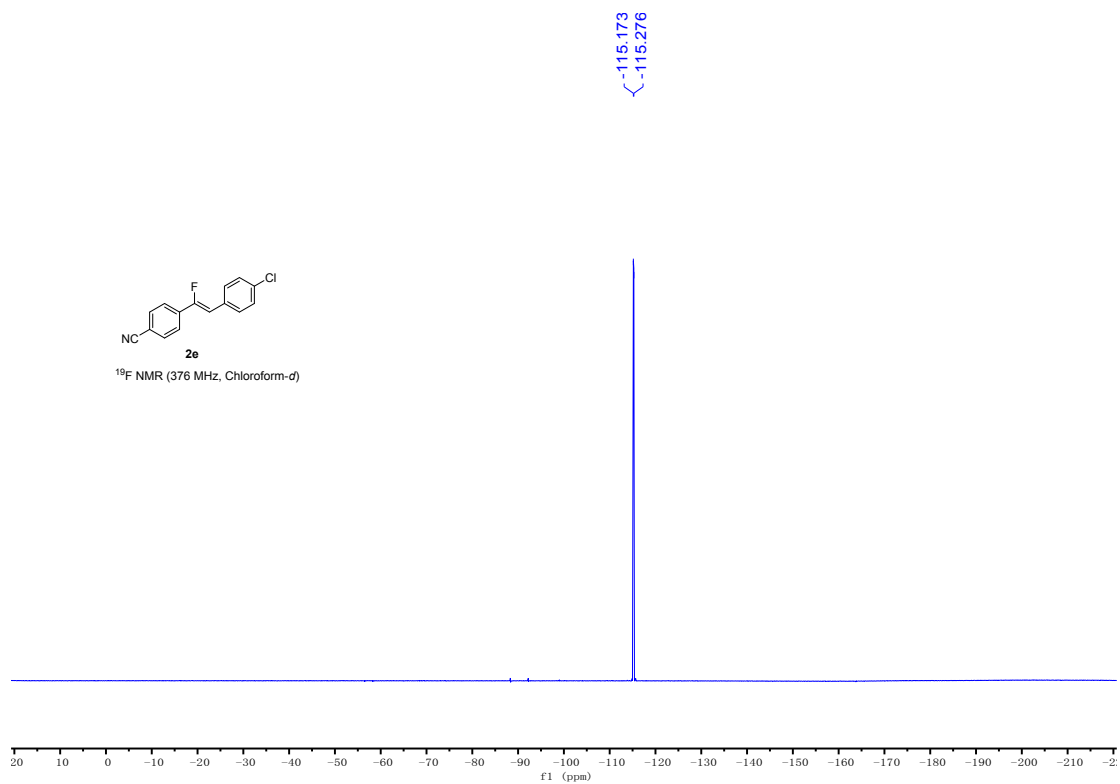

Figure S 14

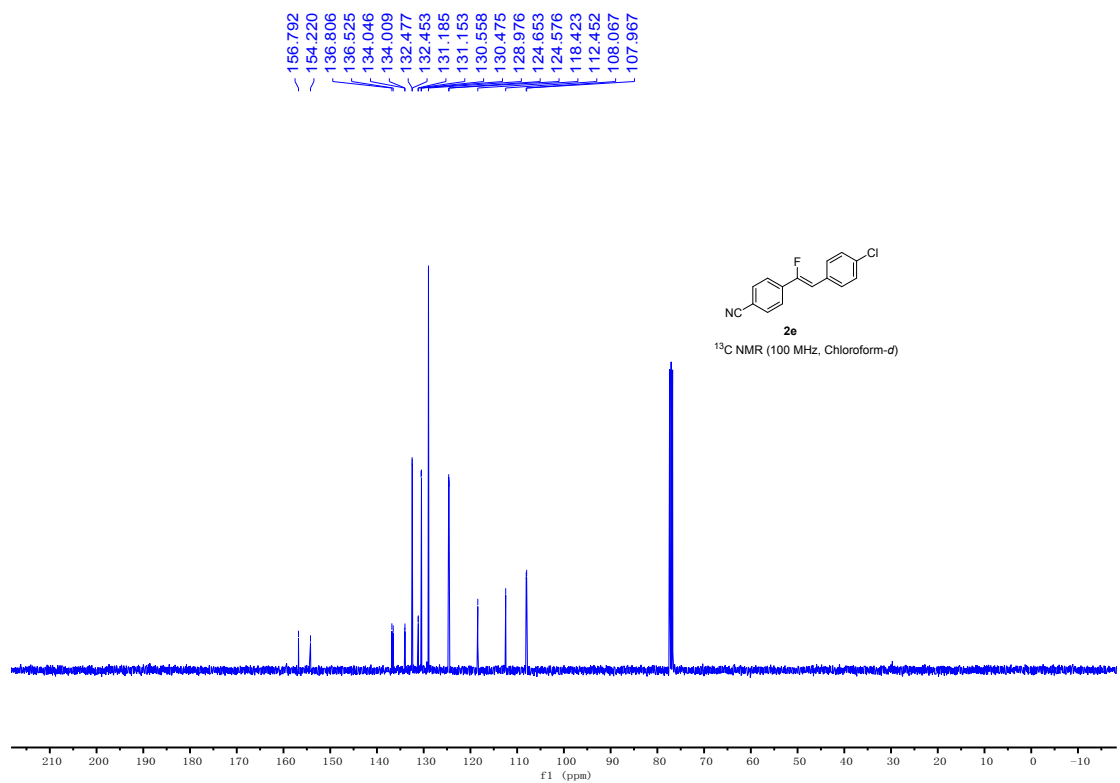

Figure S 15

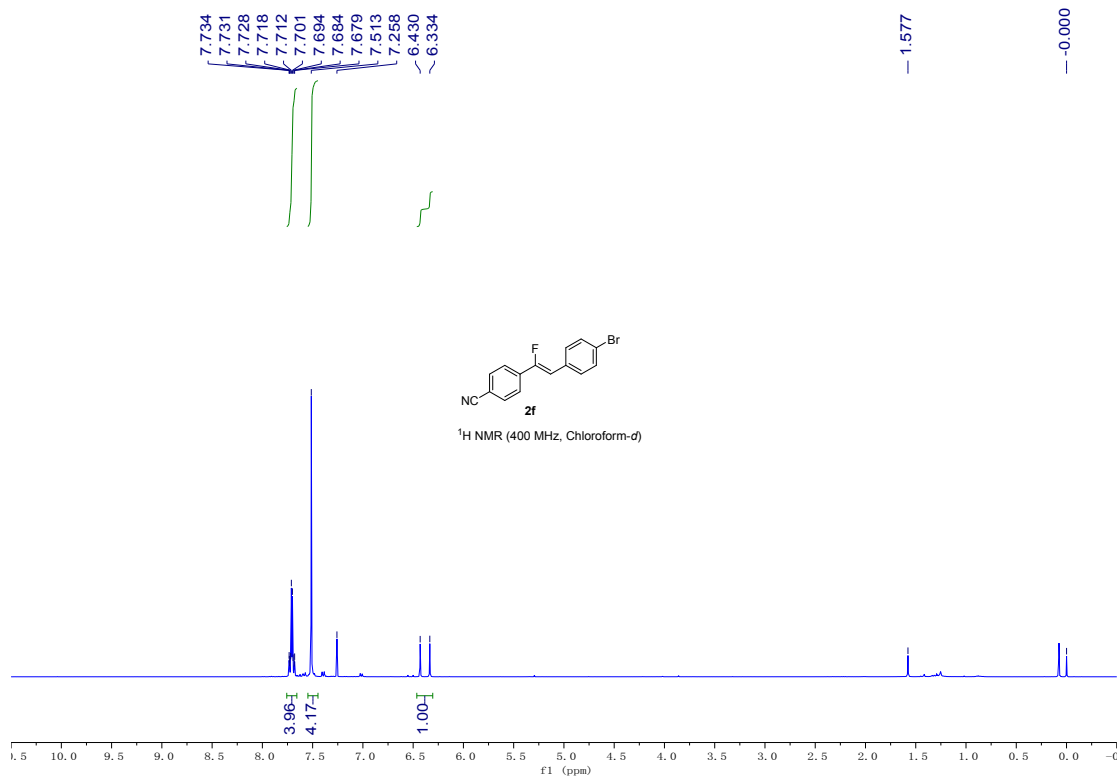

Figure S 16

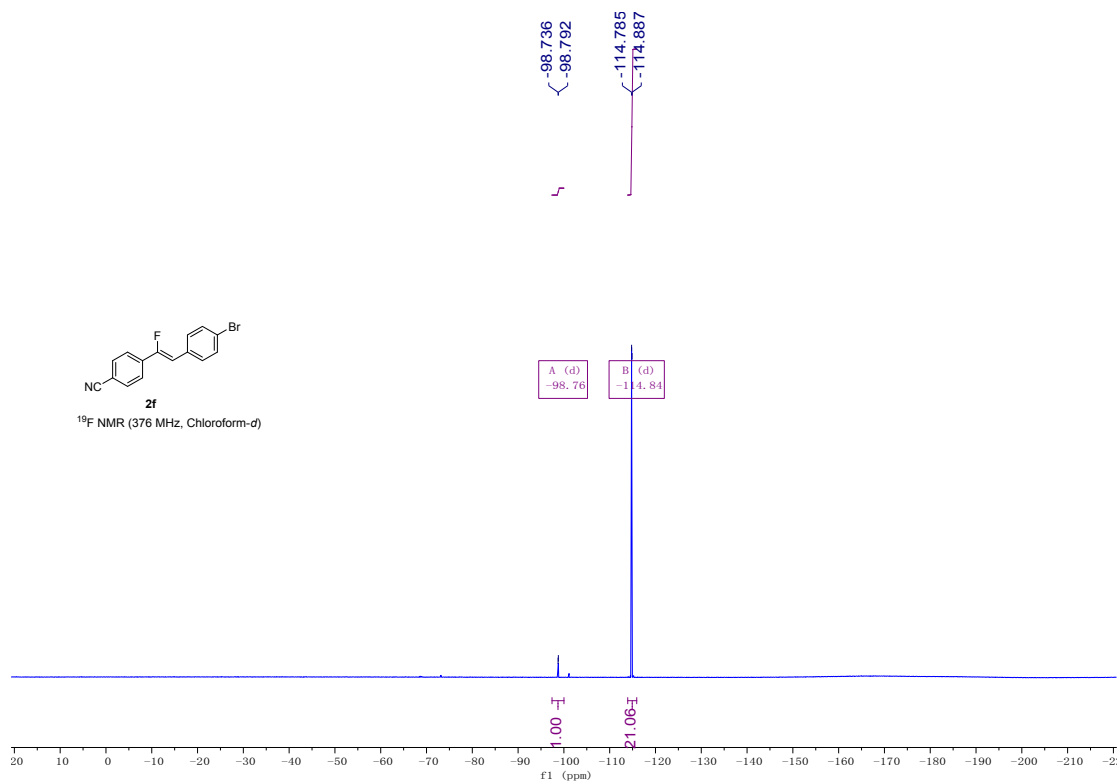

Figure S 17

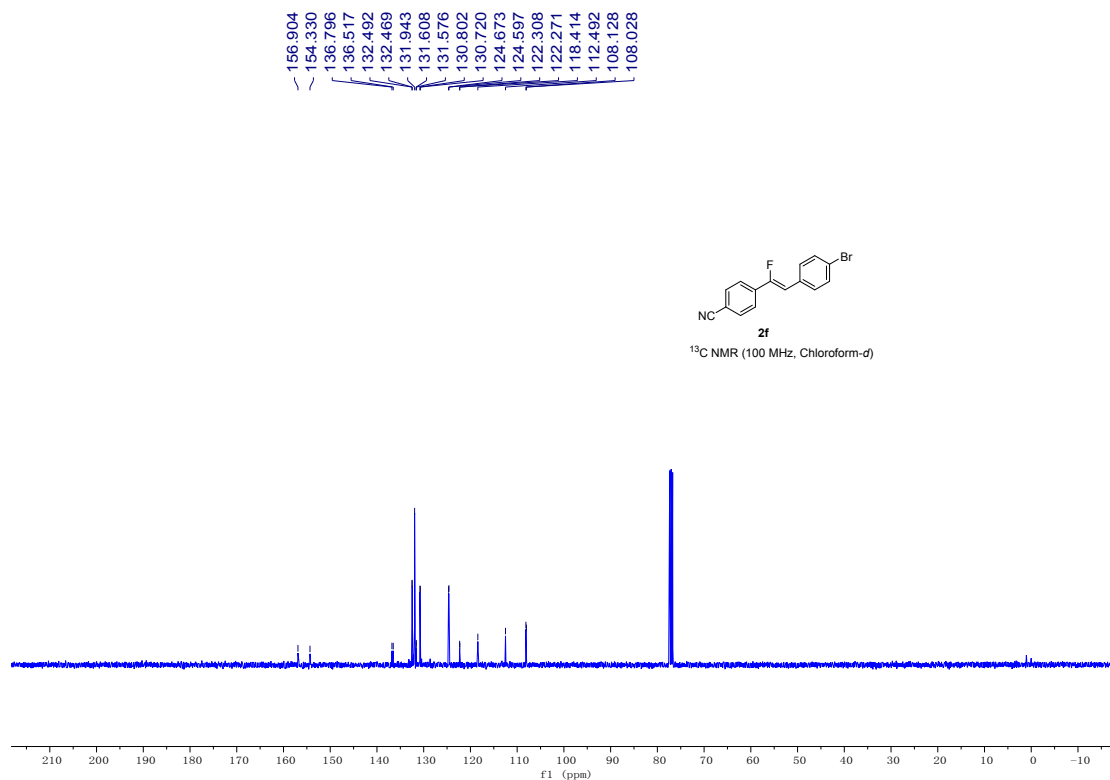

Figure S 18

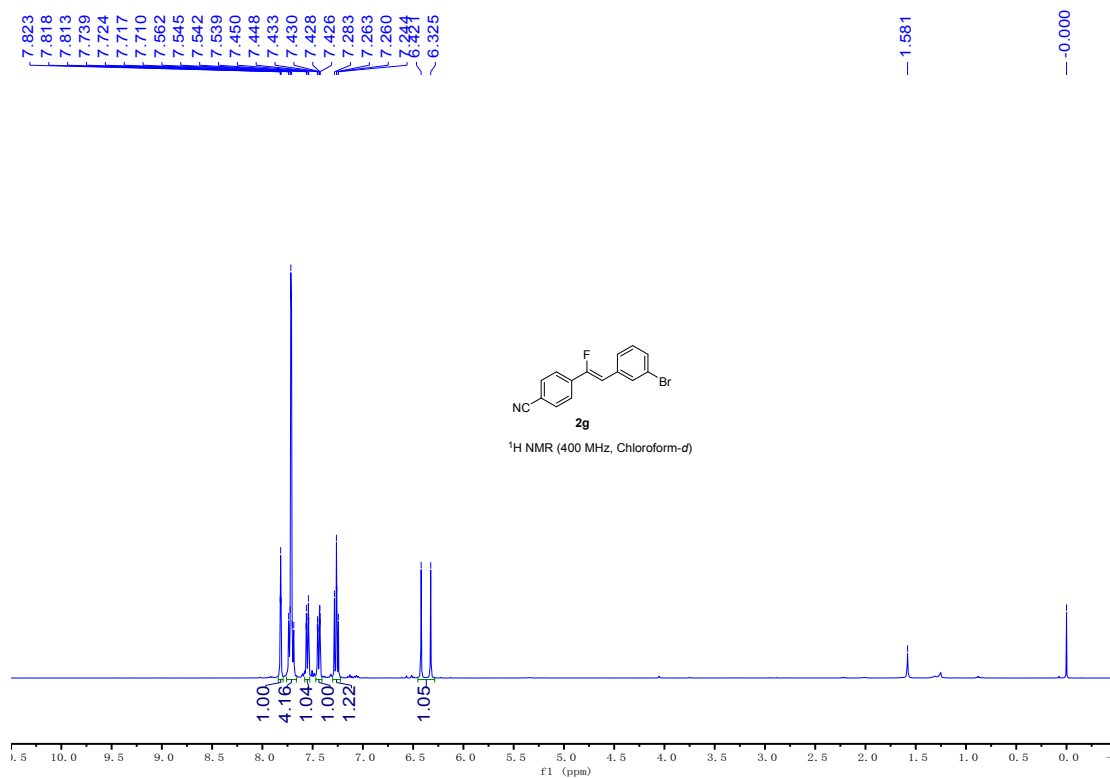

Figure S 19

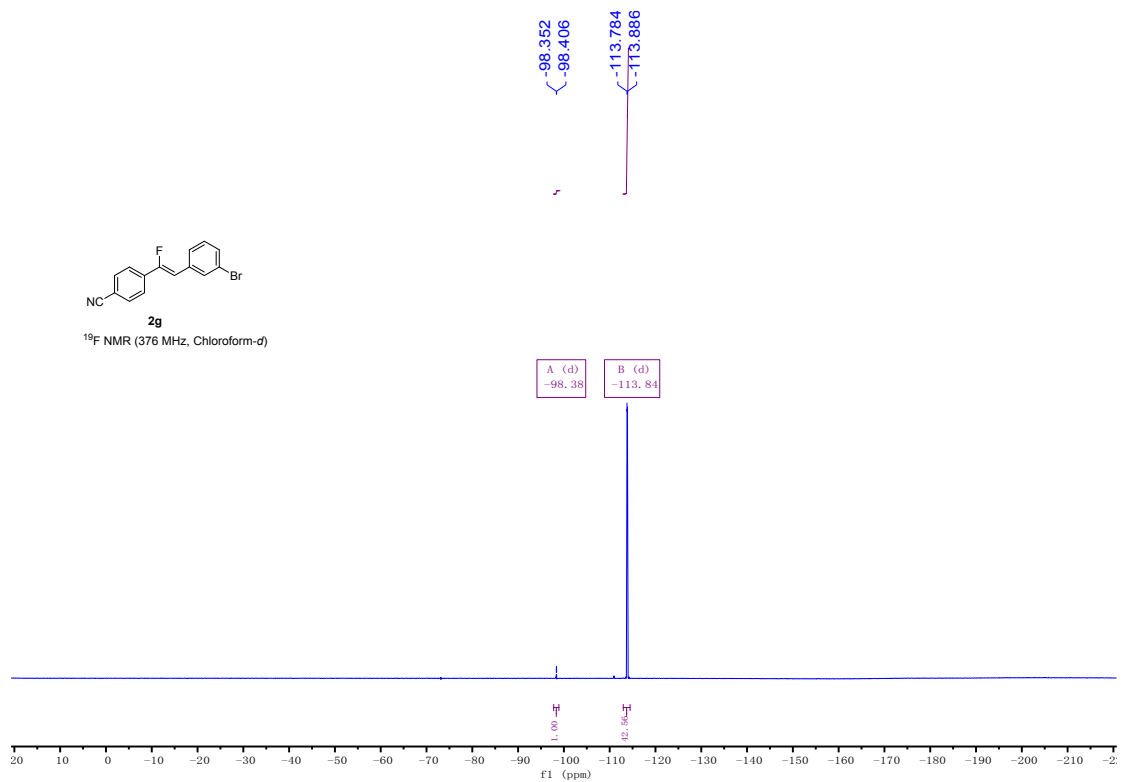

Figure S 20

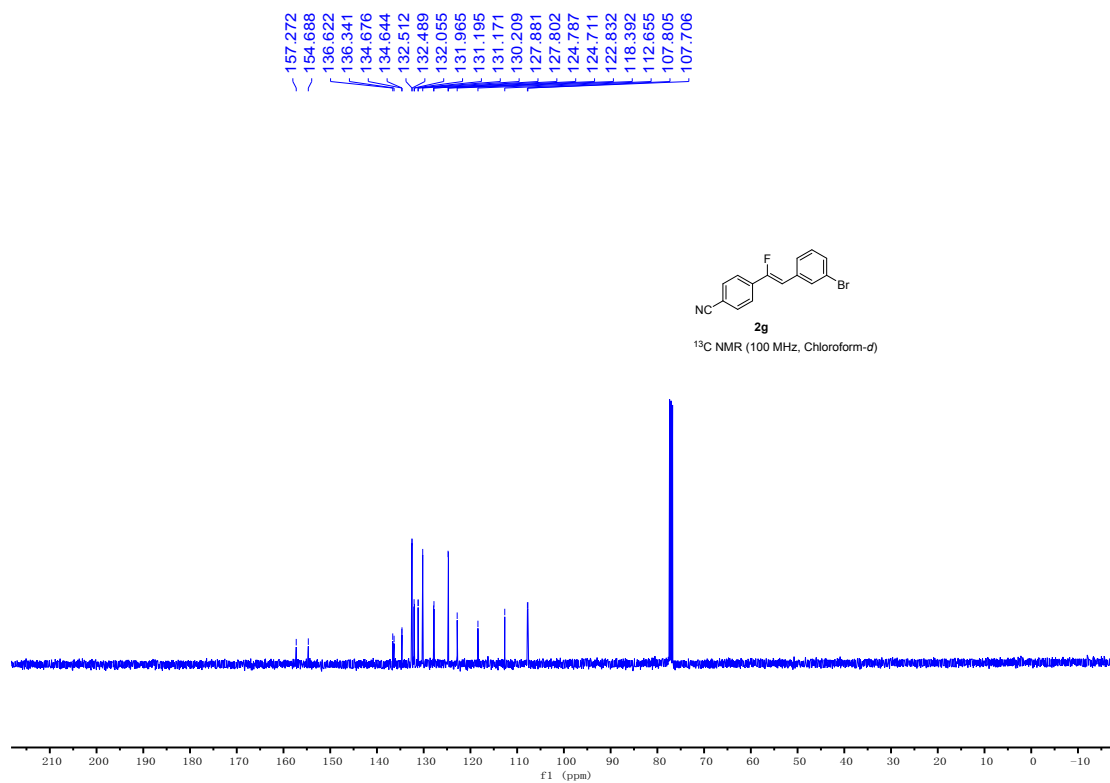

Figure S 21

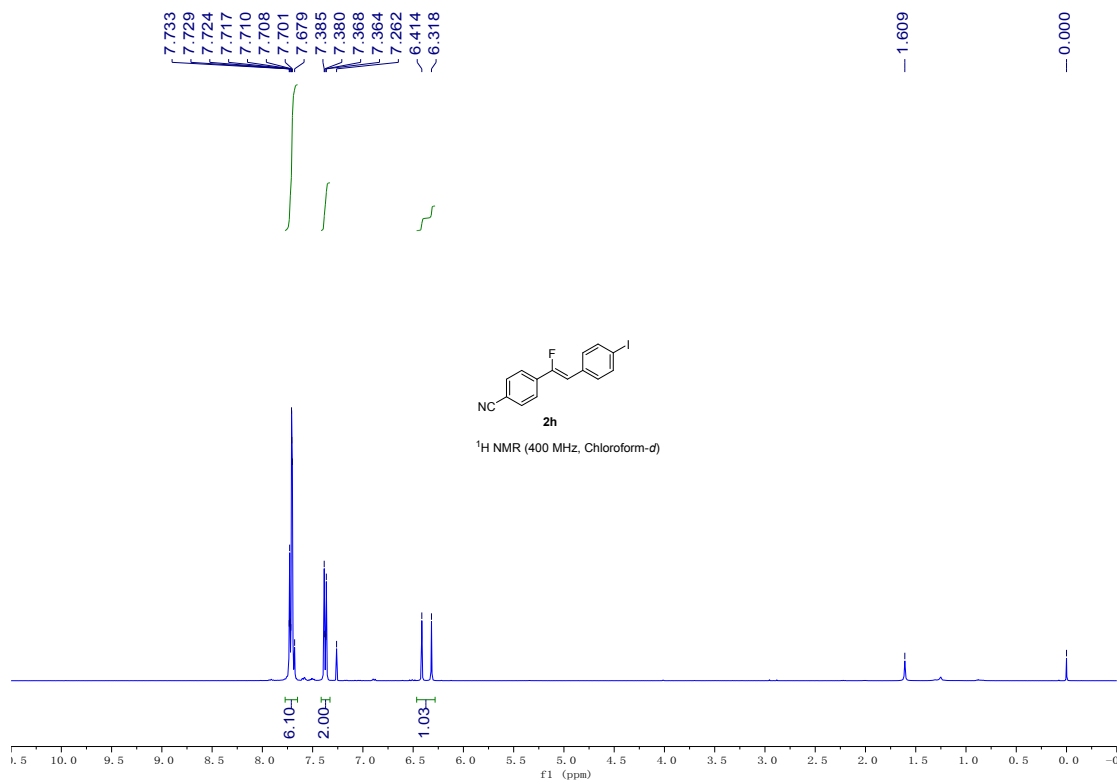

Figure S 22

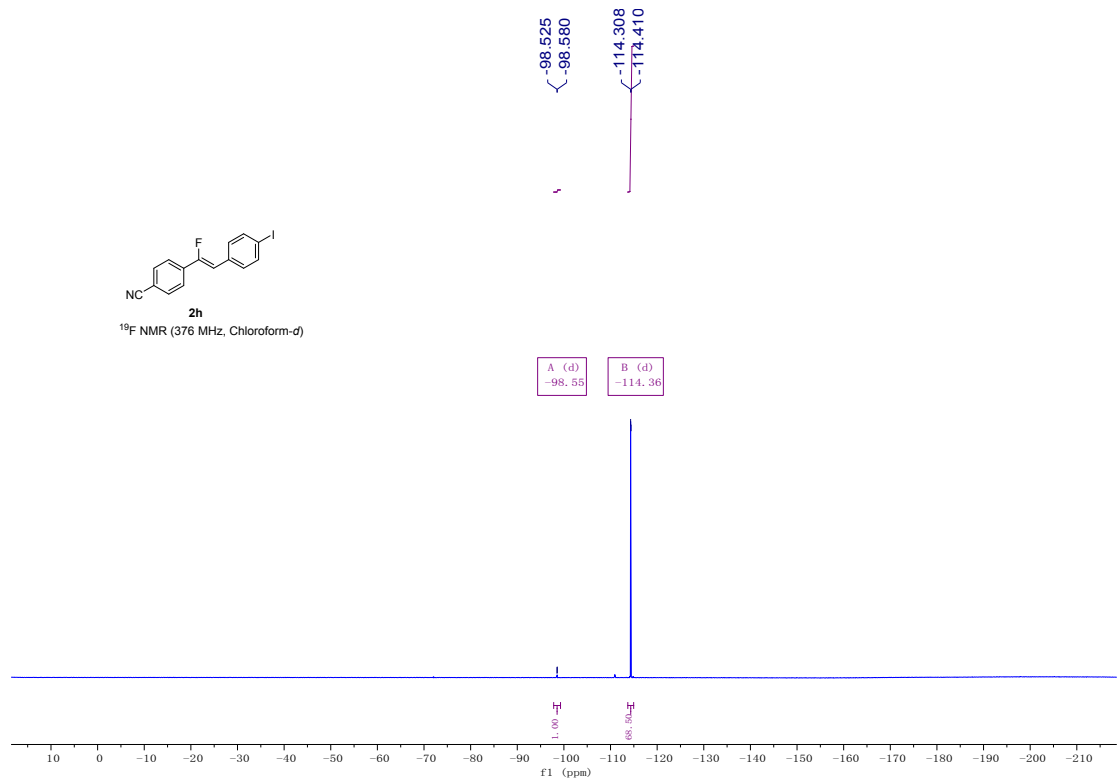

Figure S 23

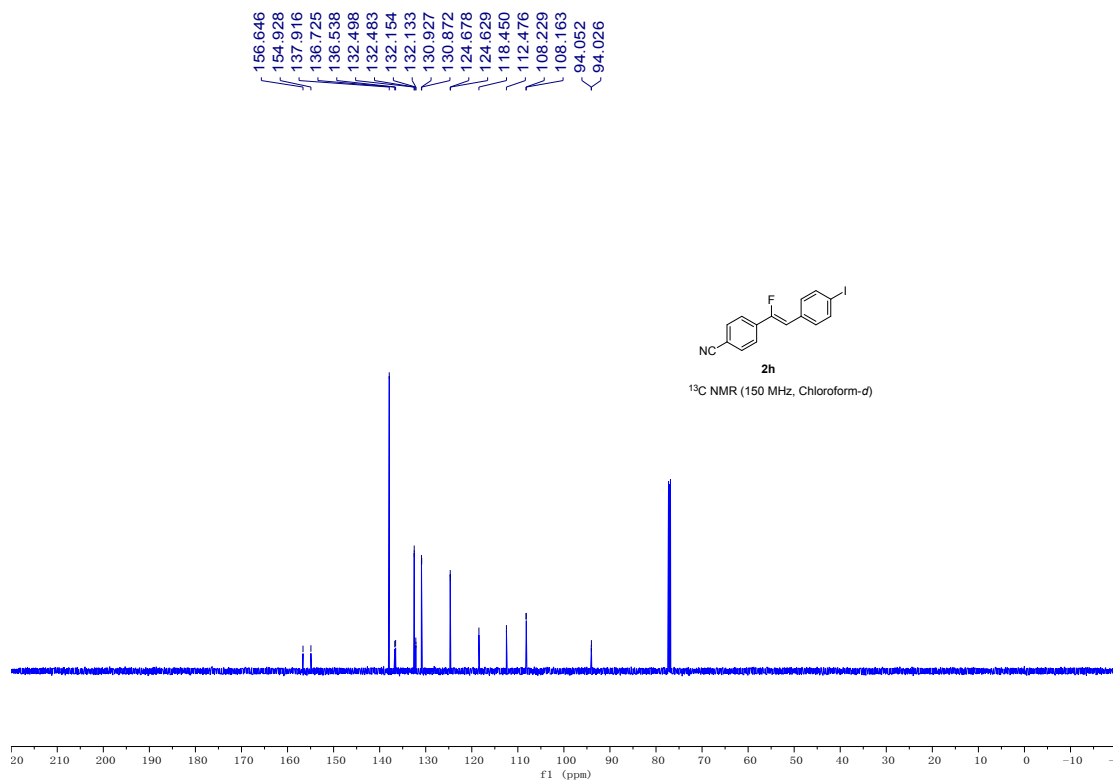

Figure S 24

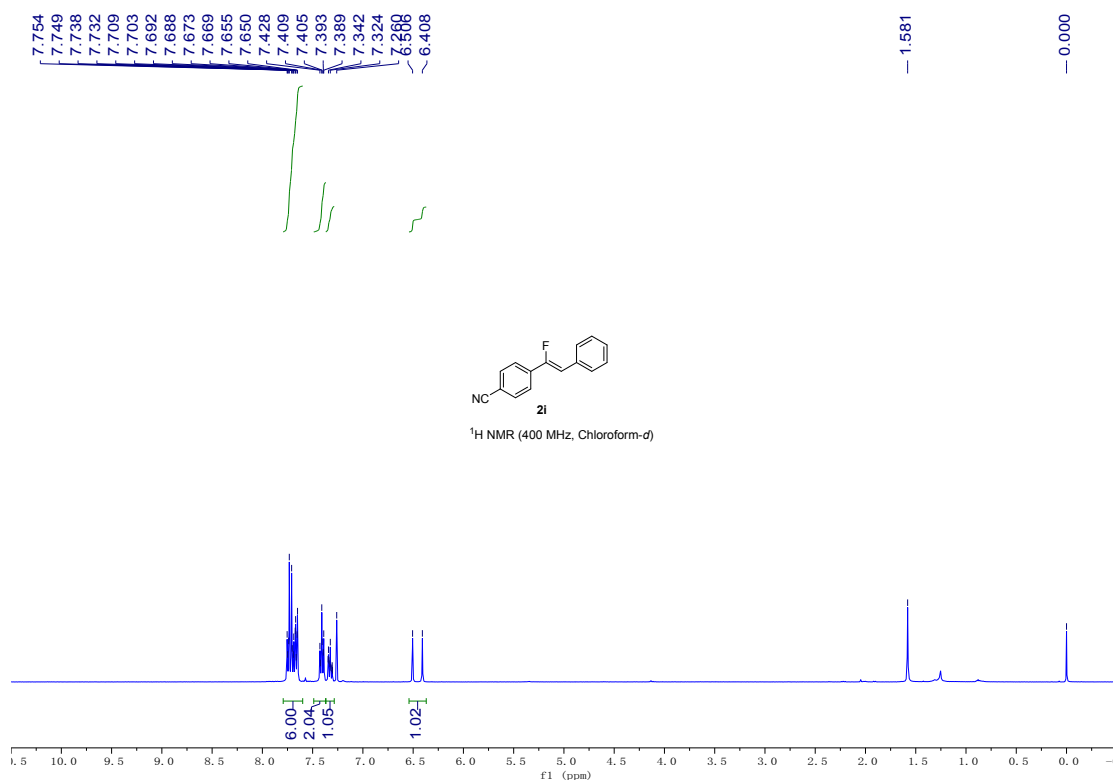

Figure S 25

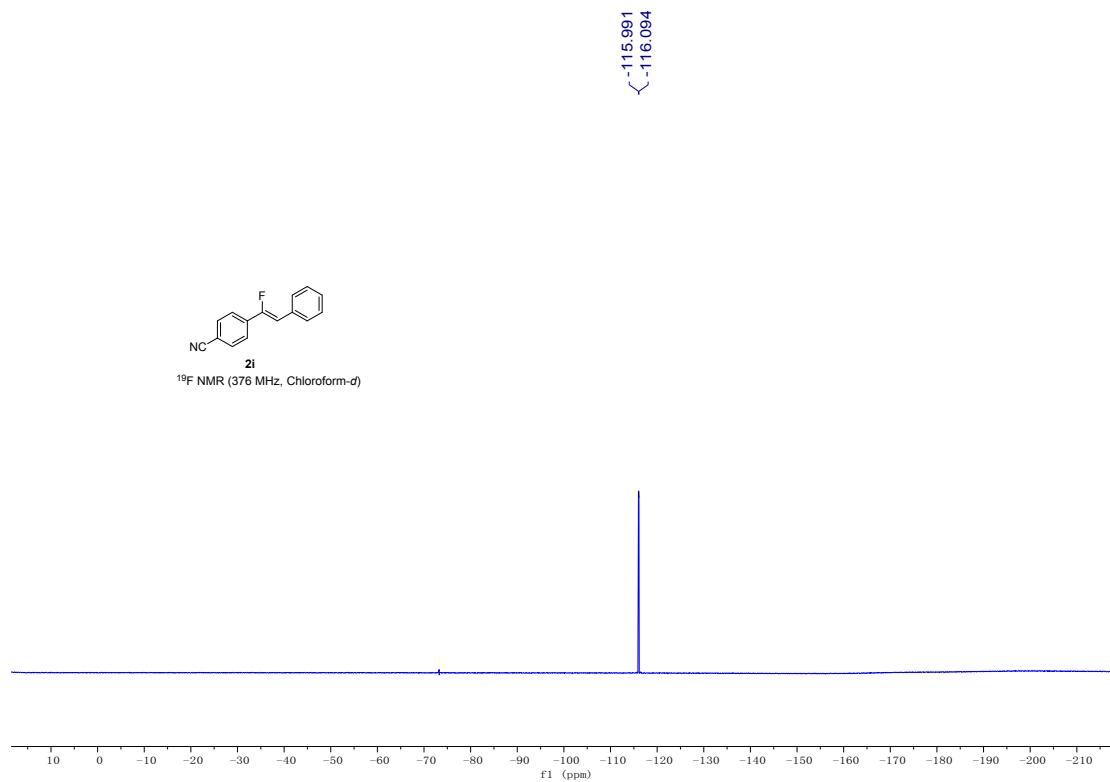

Figure S 26

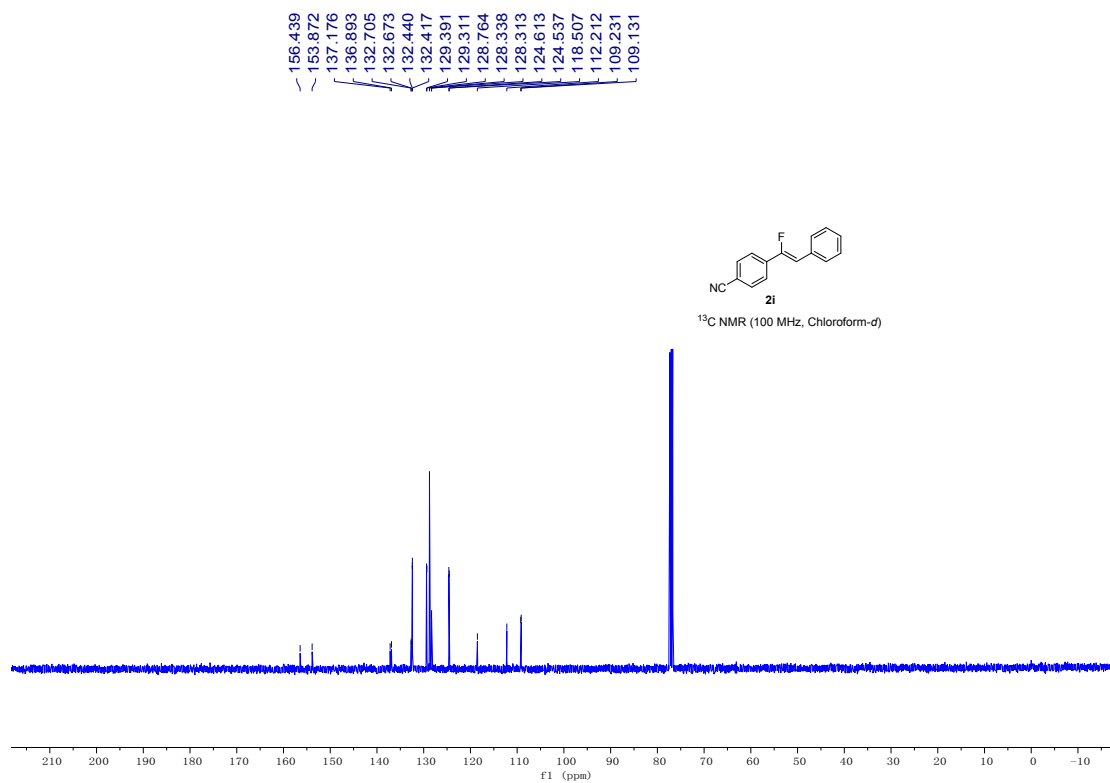

Figure S 27



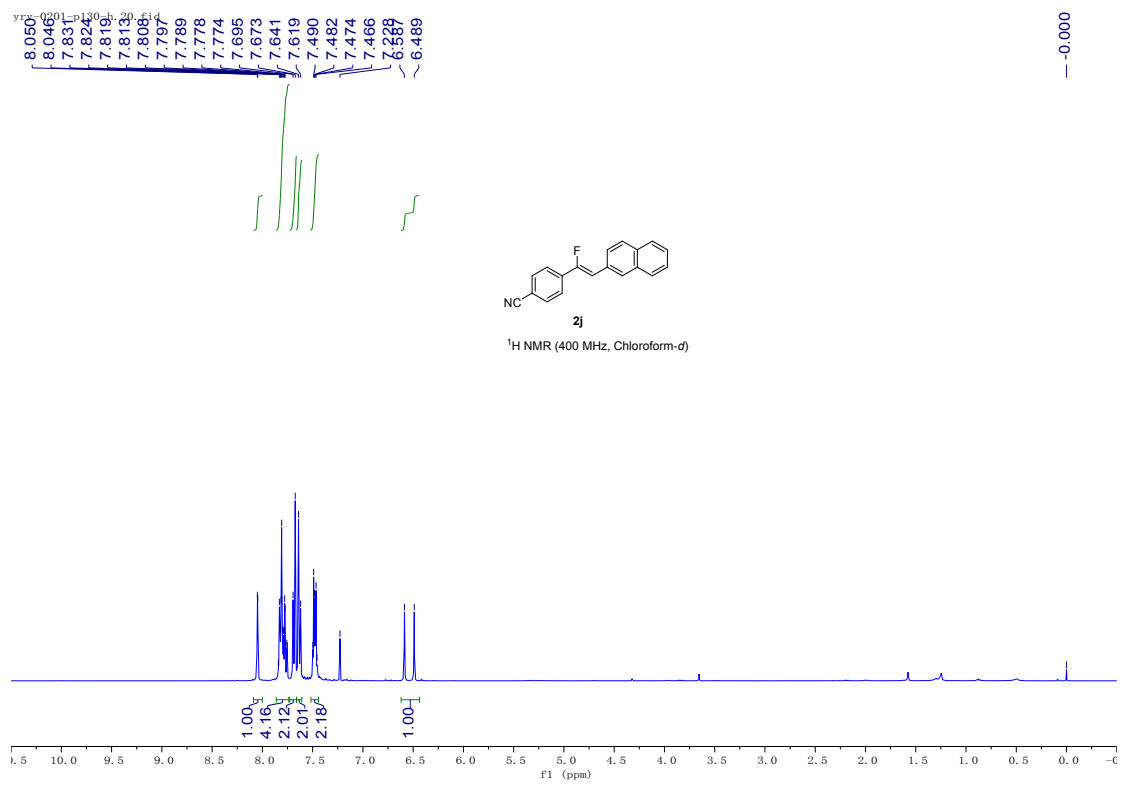

Figure S 28

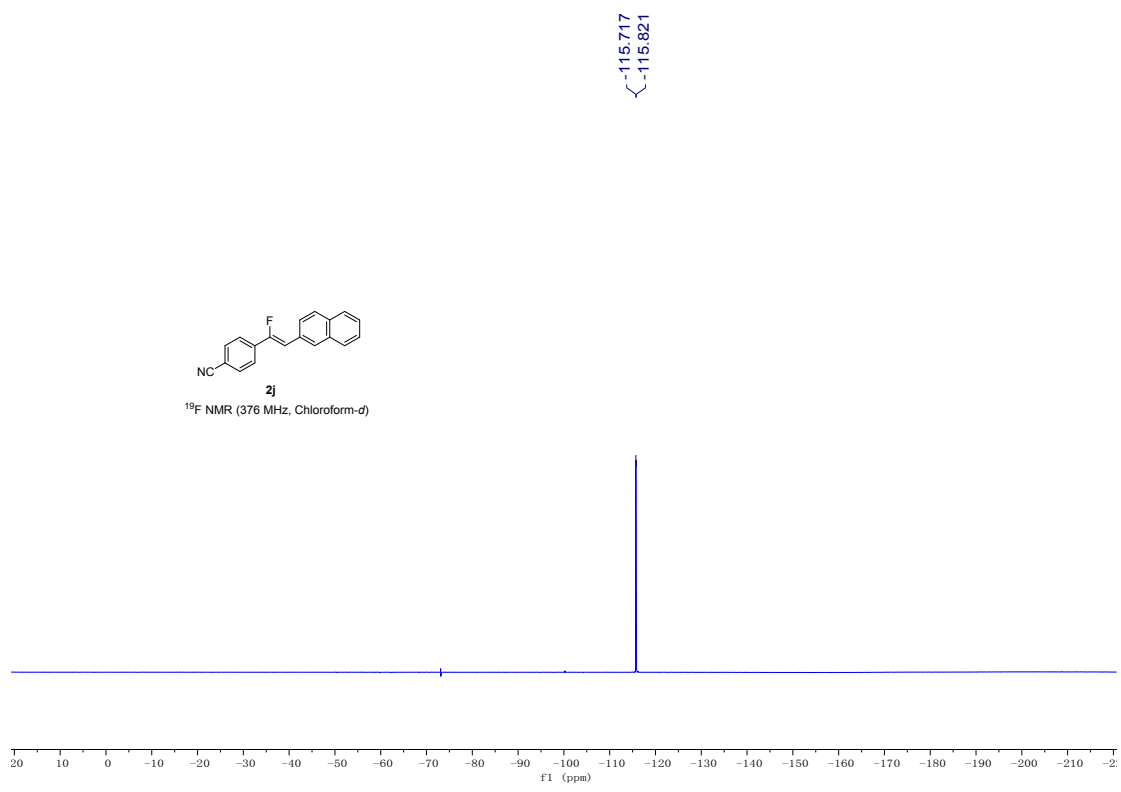

Figure S 29

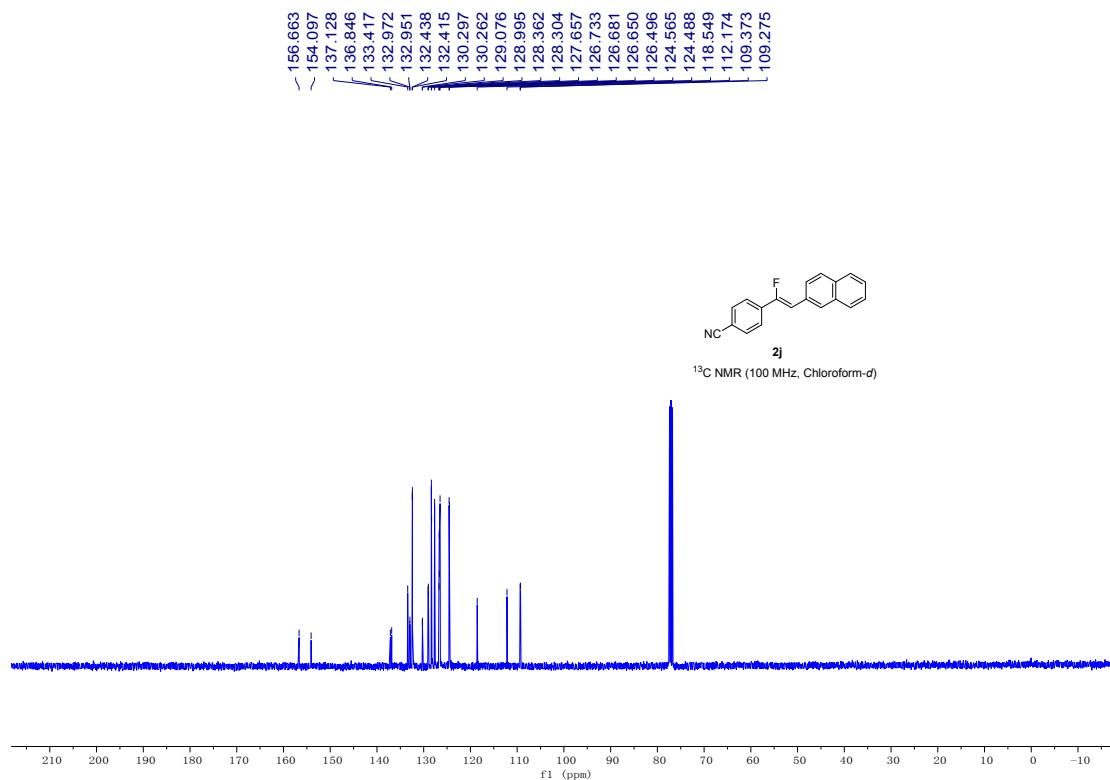

Figure S 30

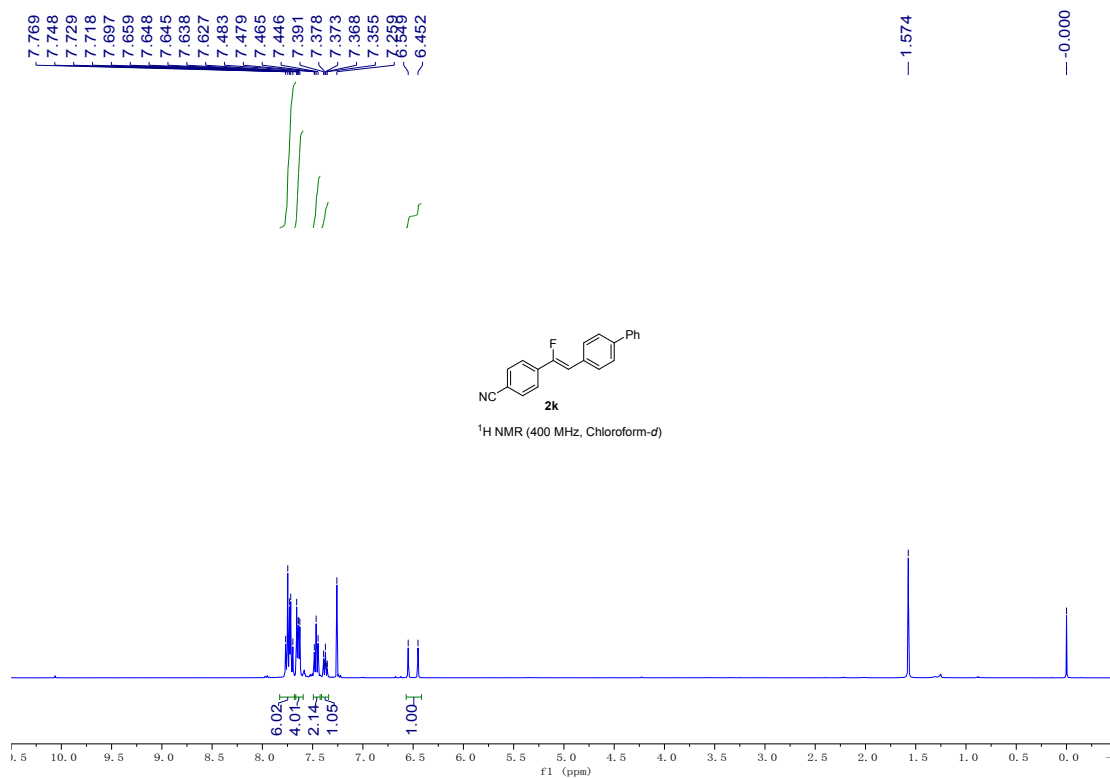

Figure S 31

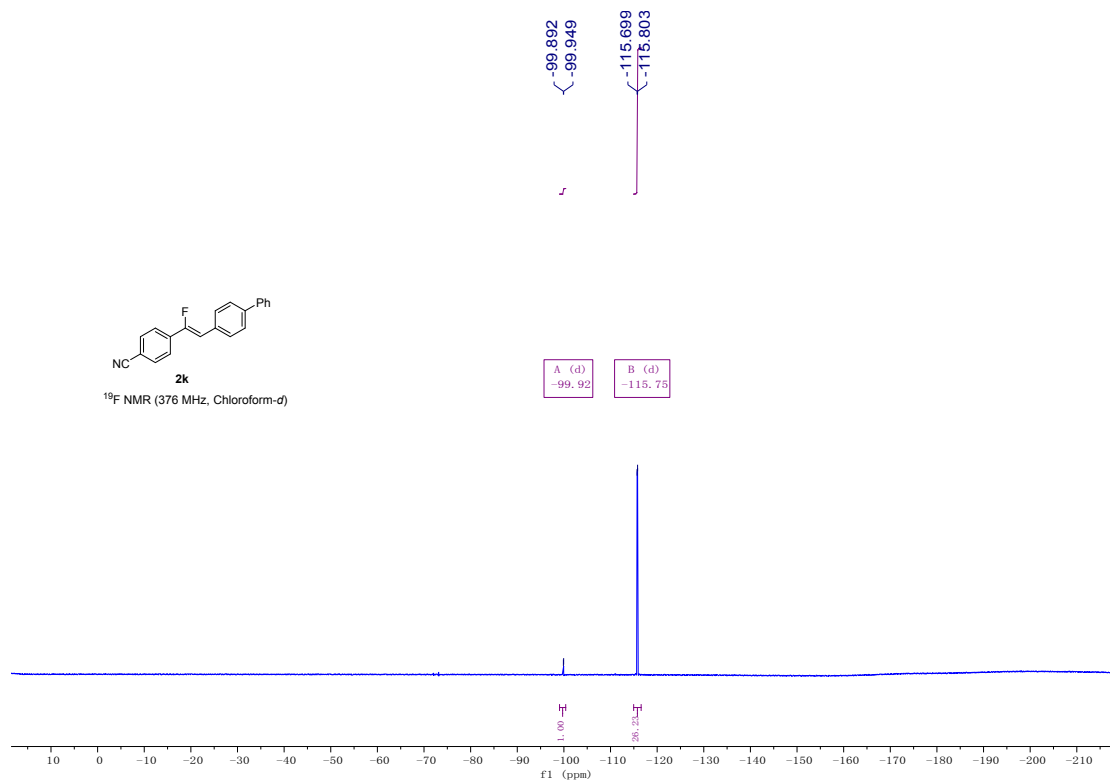

Figure S 32

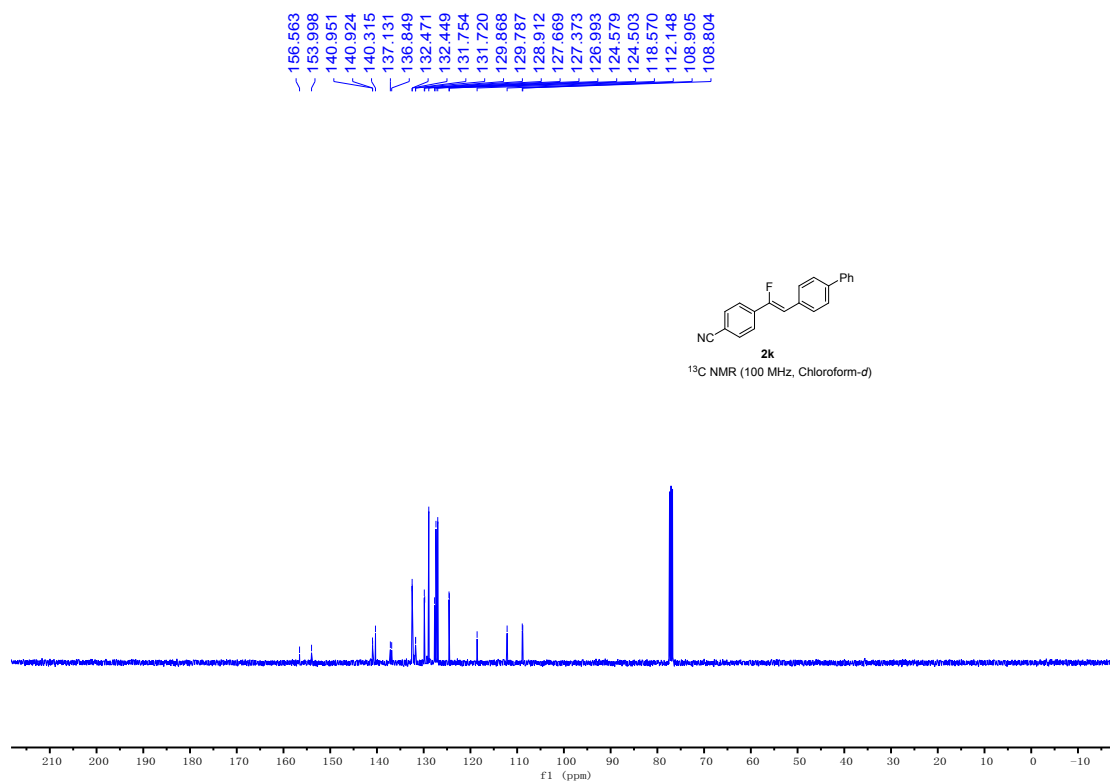

Figure S 33

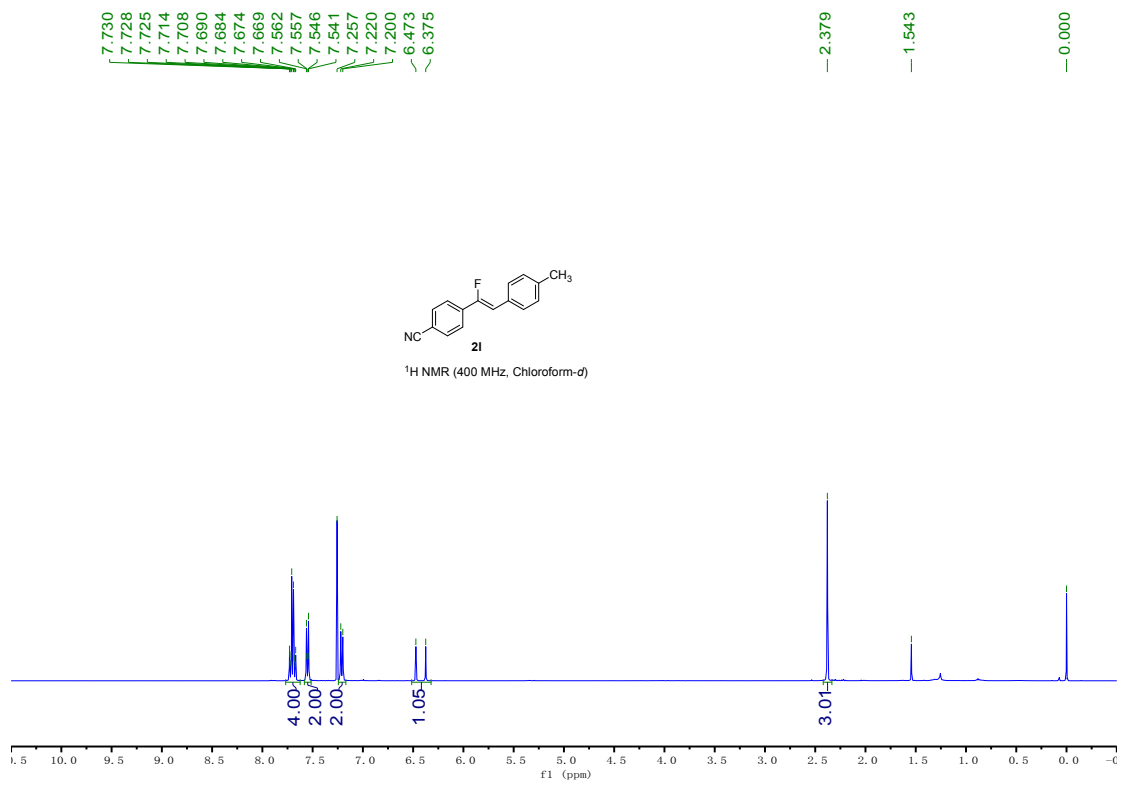

Figure S 34

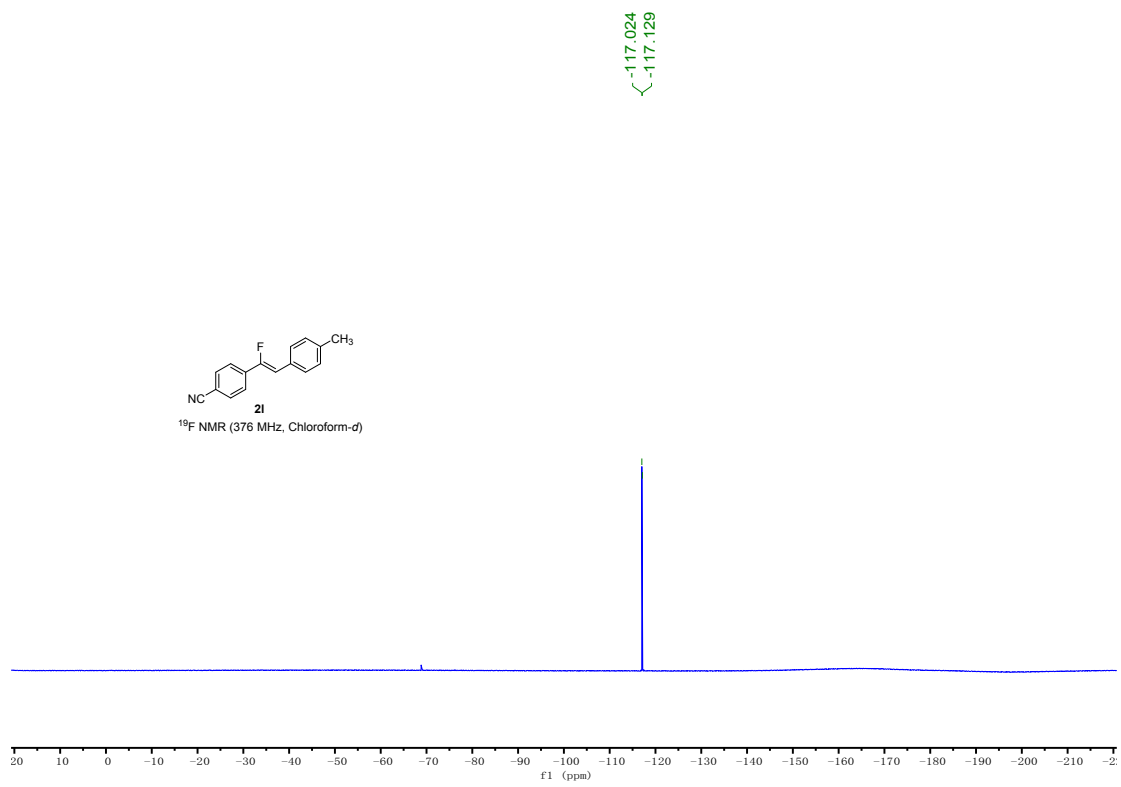

Figure S 35

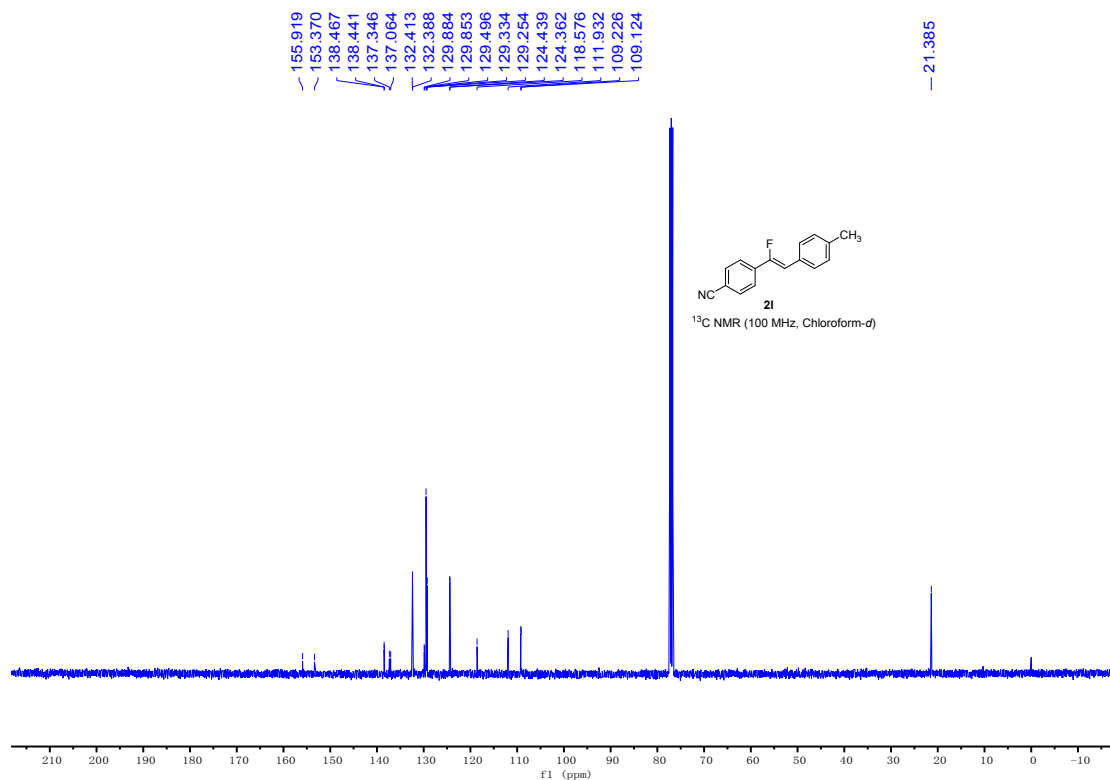

Figure S 36

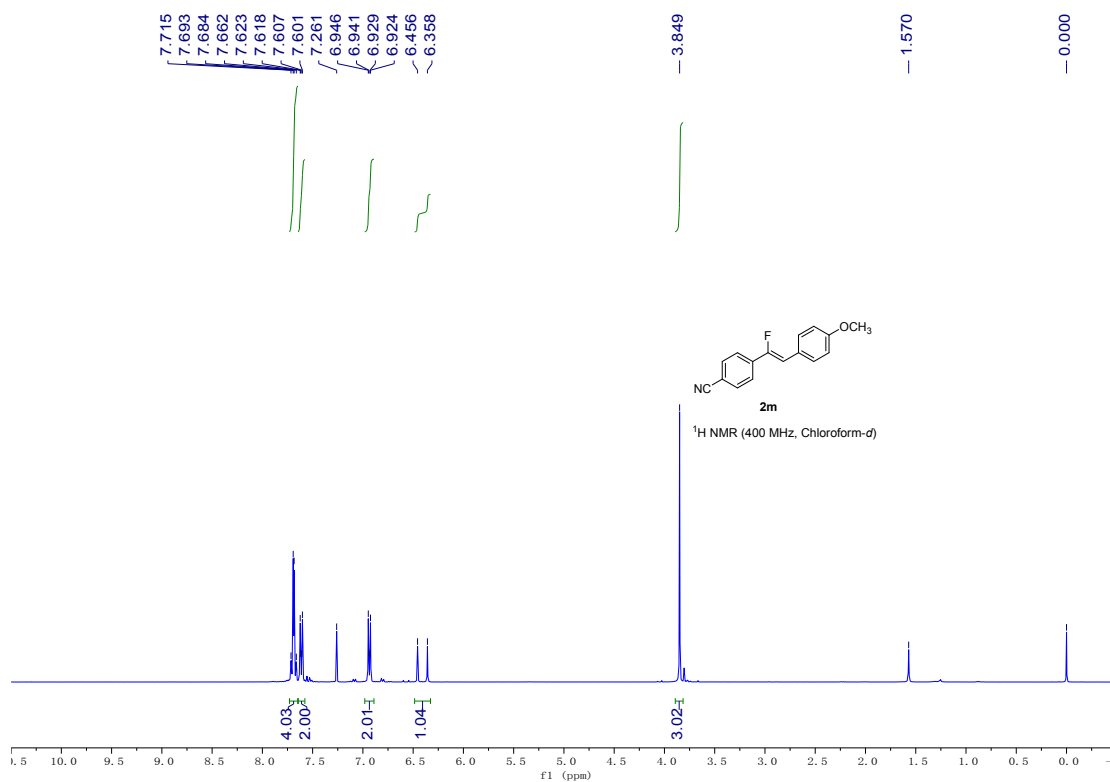

Figure S 37

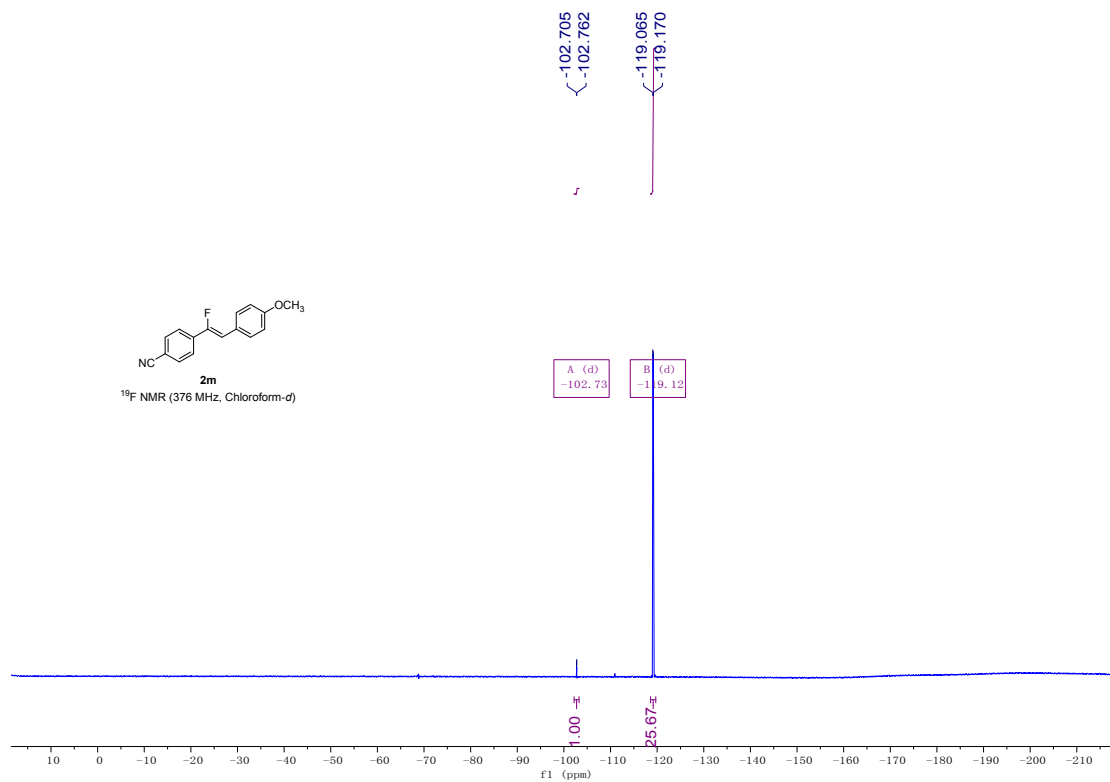

Figure S 38

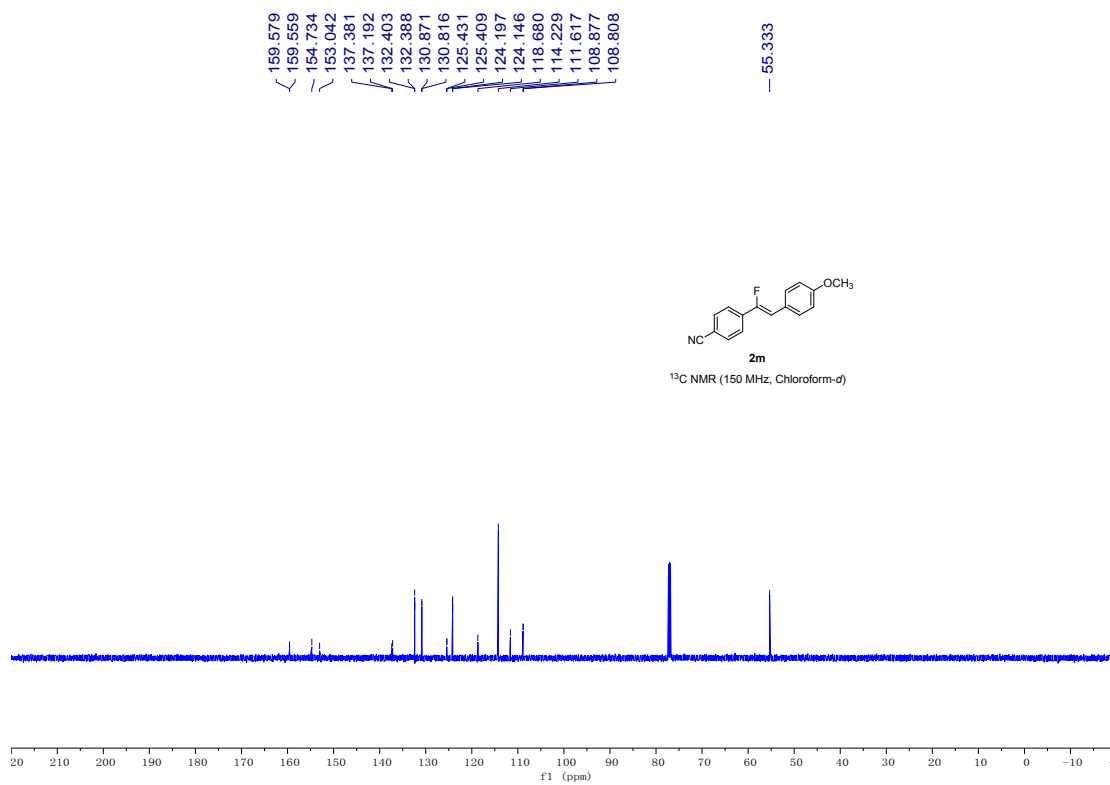

Figure S 39

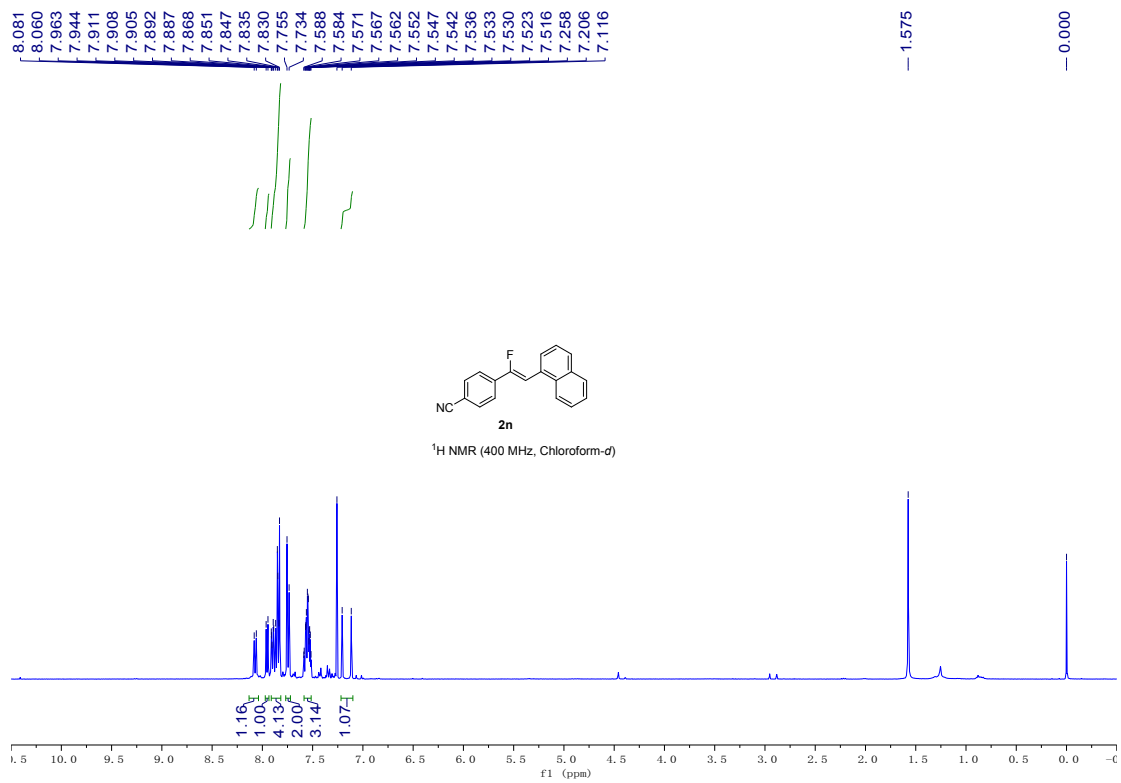

Figure S 40

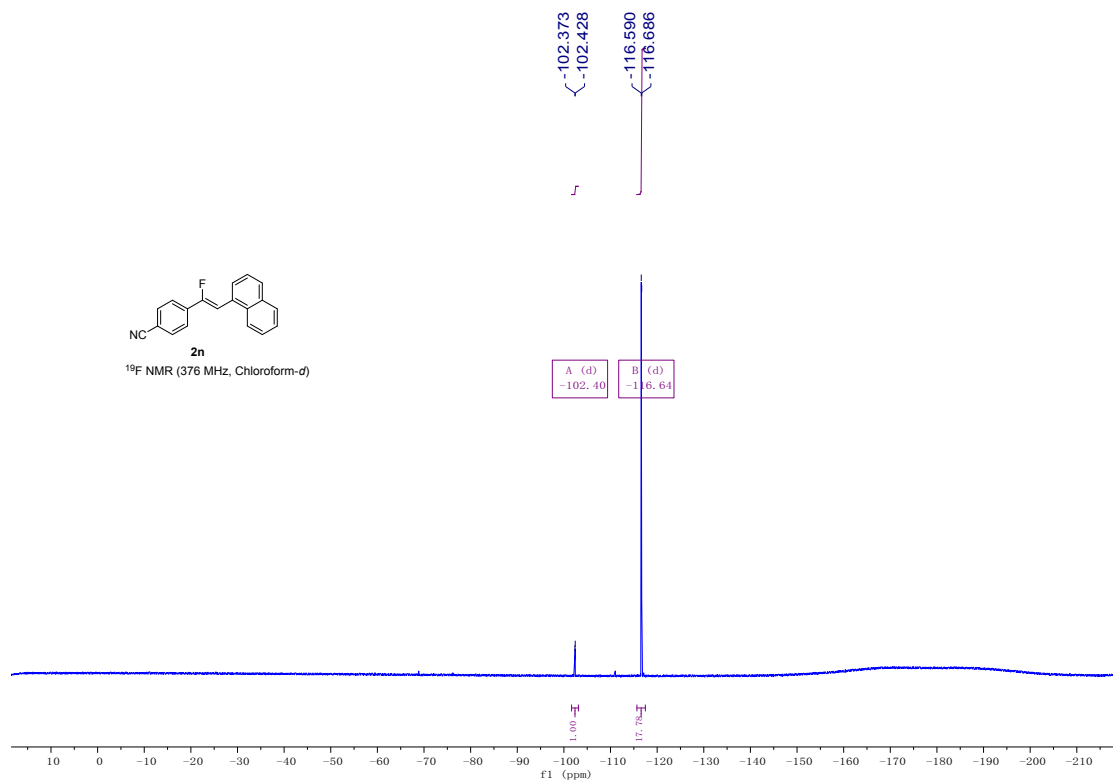

Figure S 41

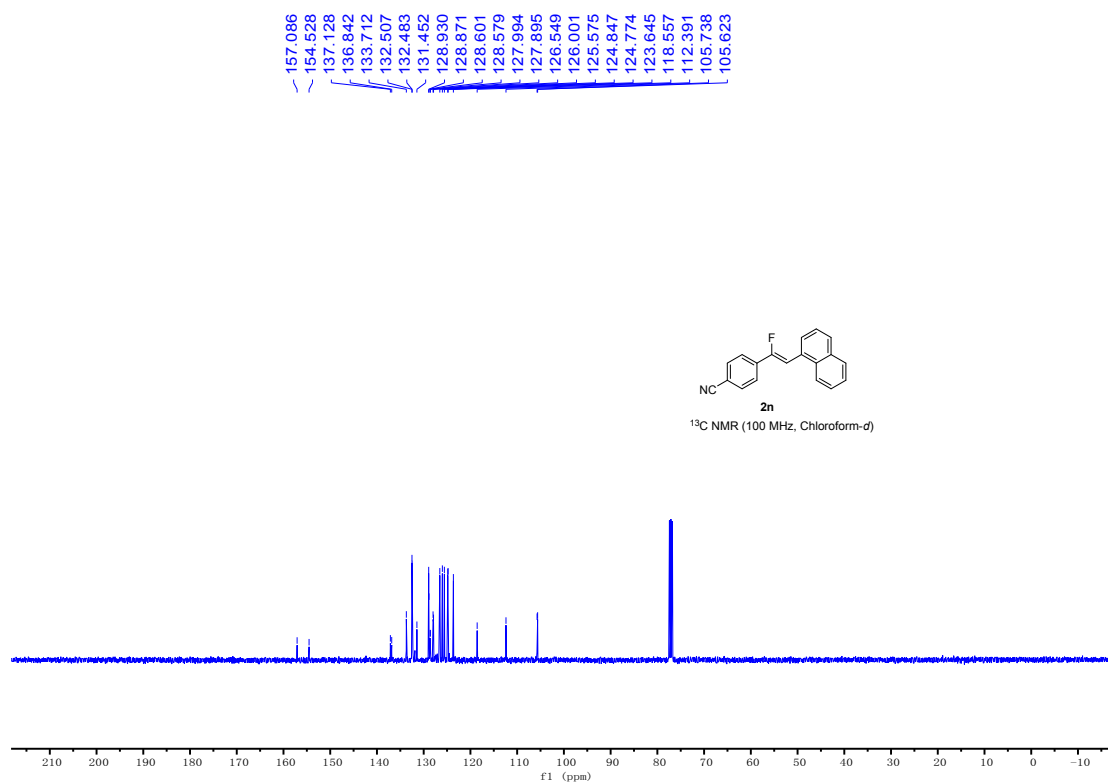

Figure S 42

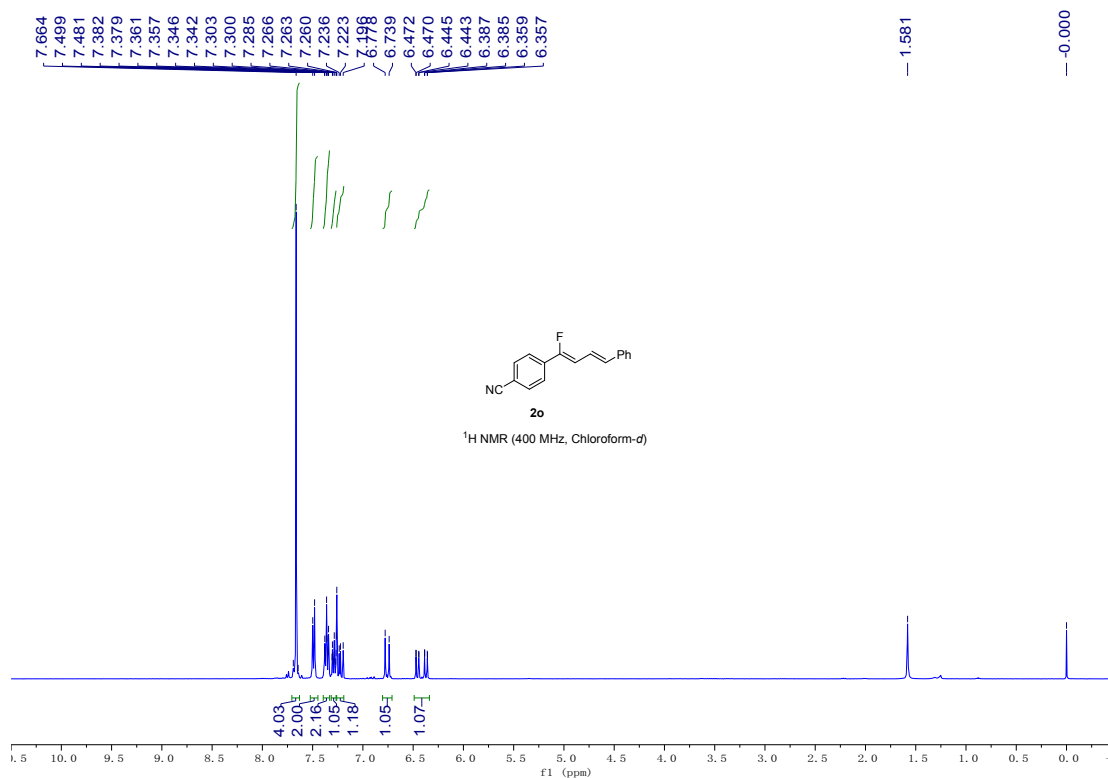

Figure S 43



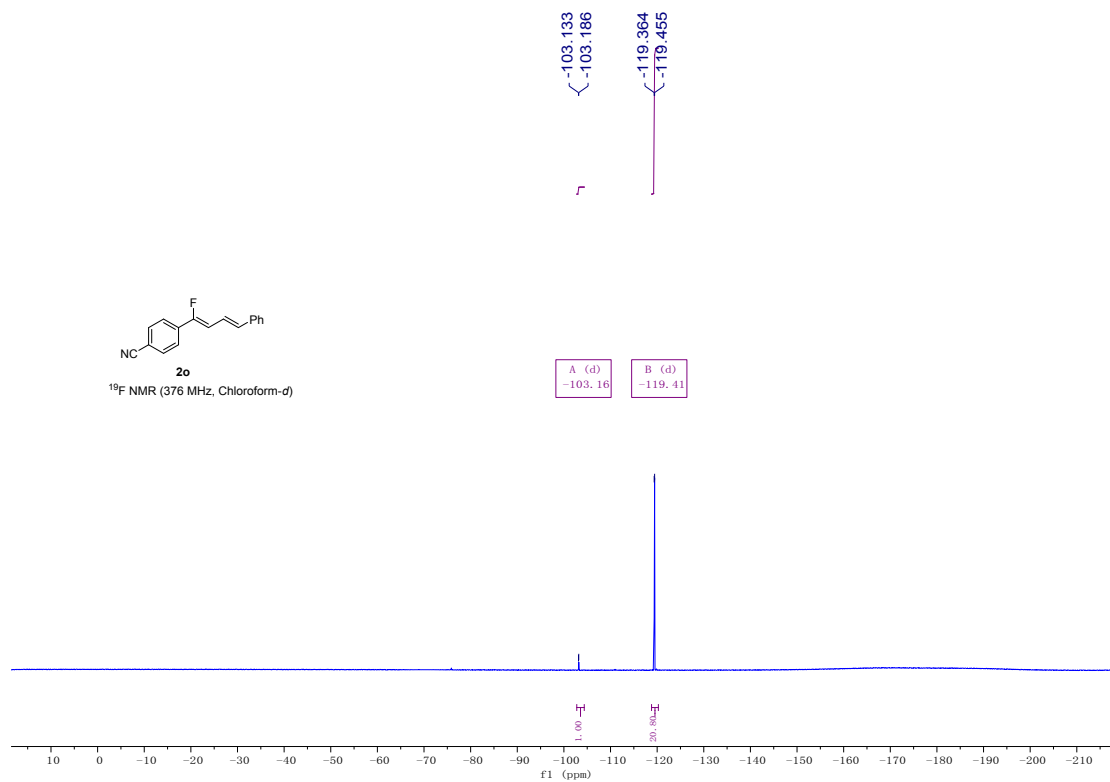

Figure S 44

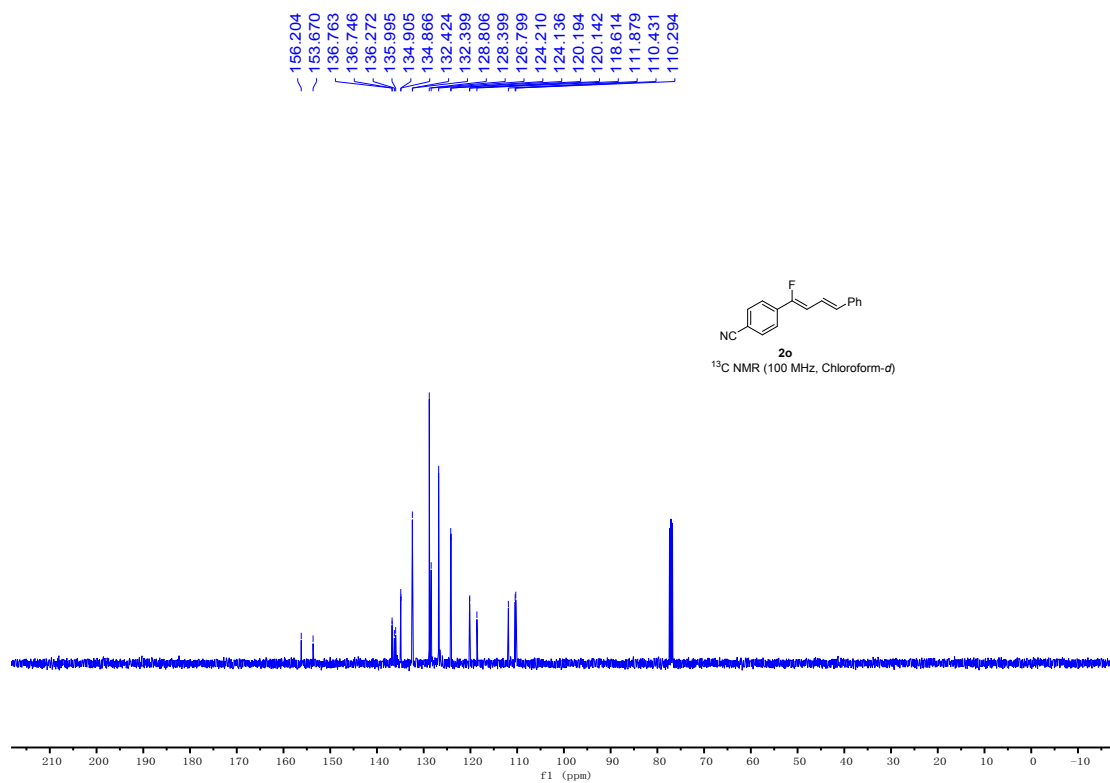

Figure S 45

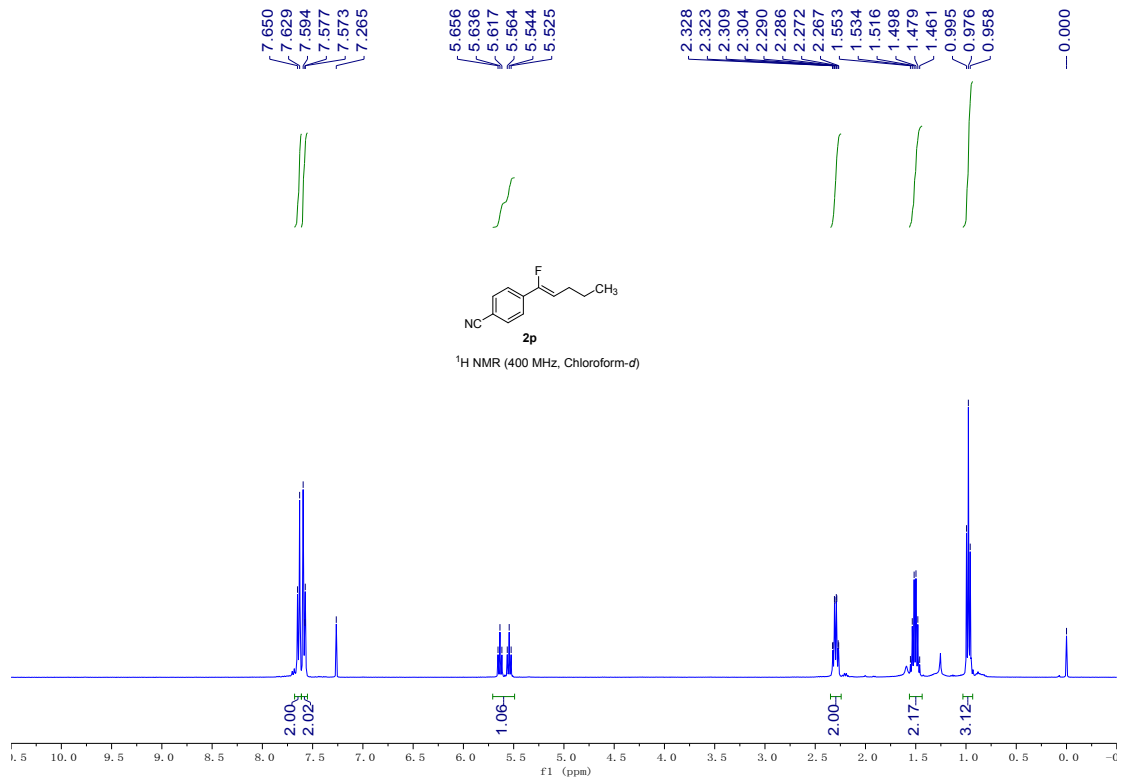

Figure S 46

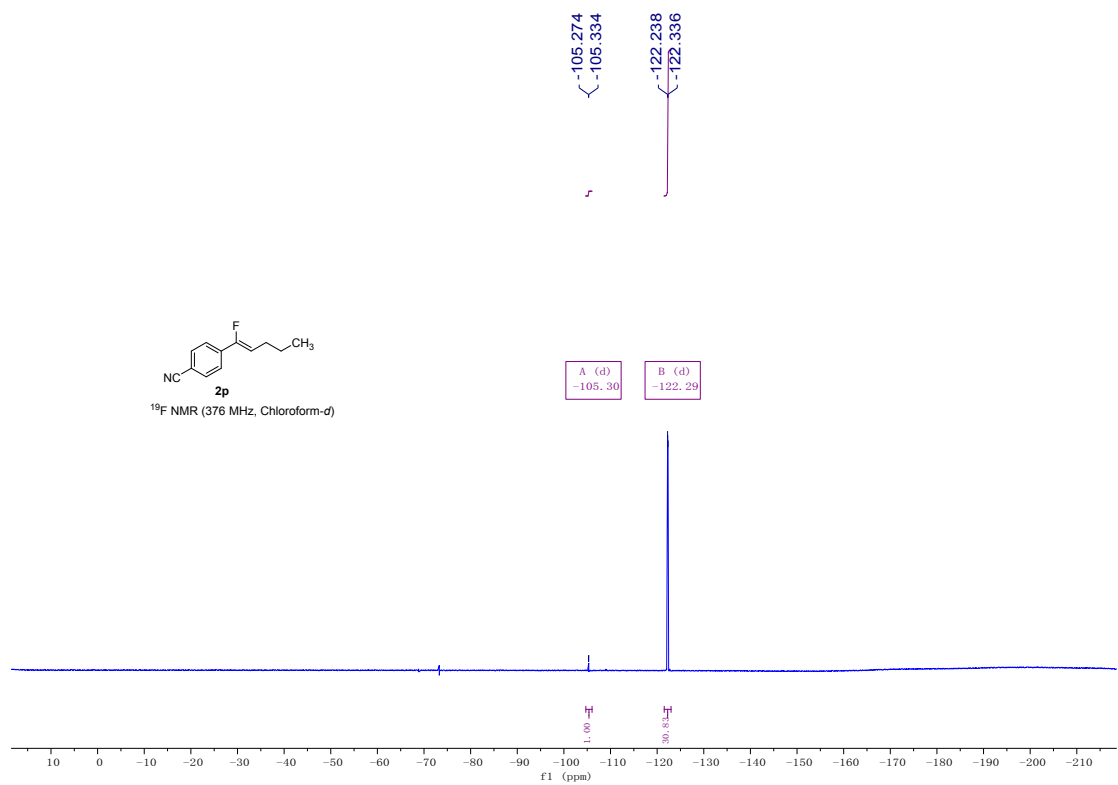

Figure S 47

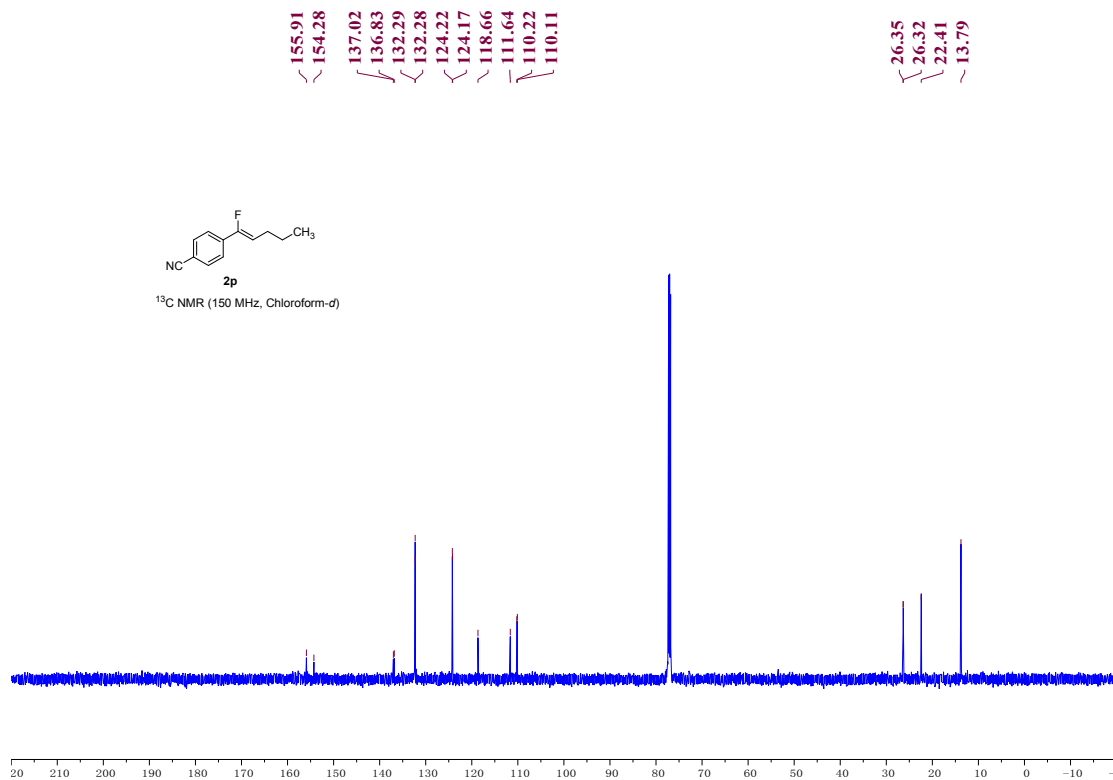

Figure S 48

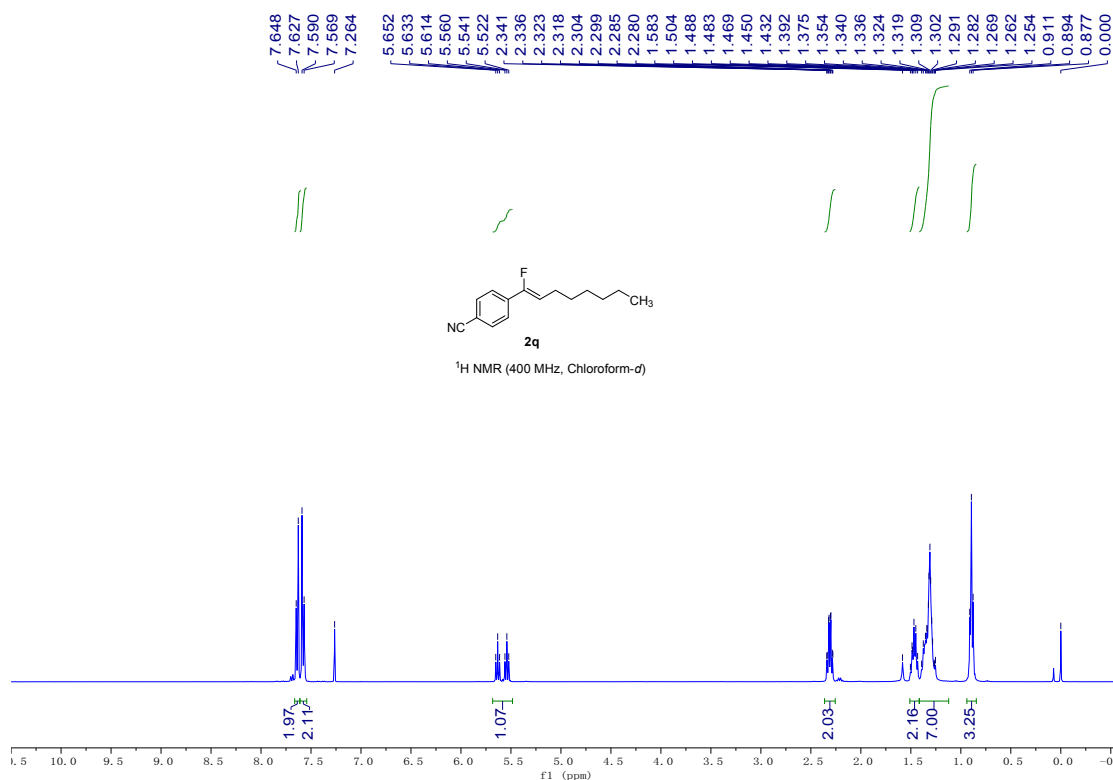

Figure S 49

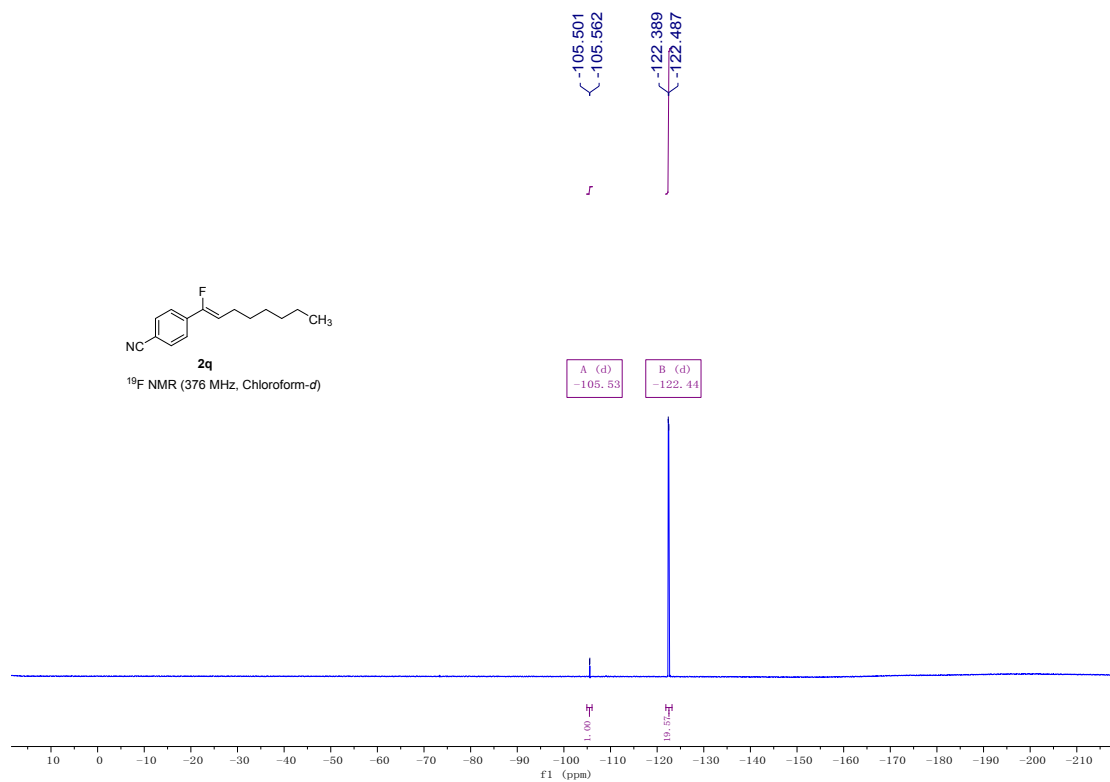

Figure S 50

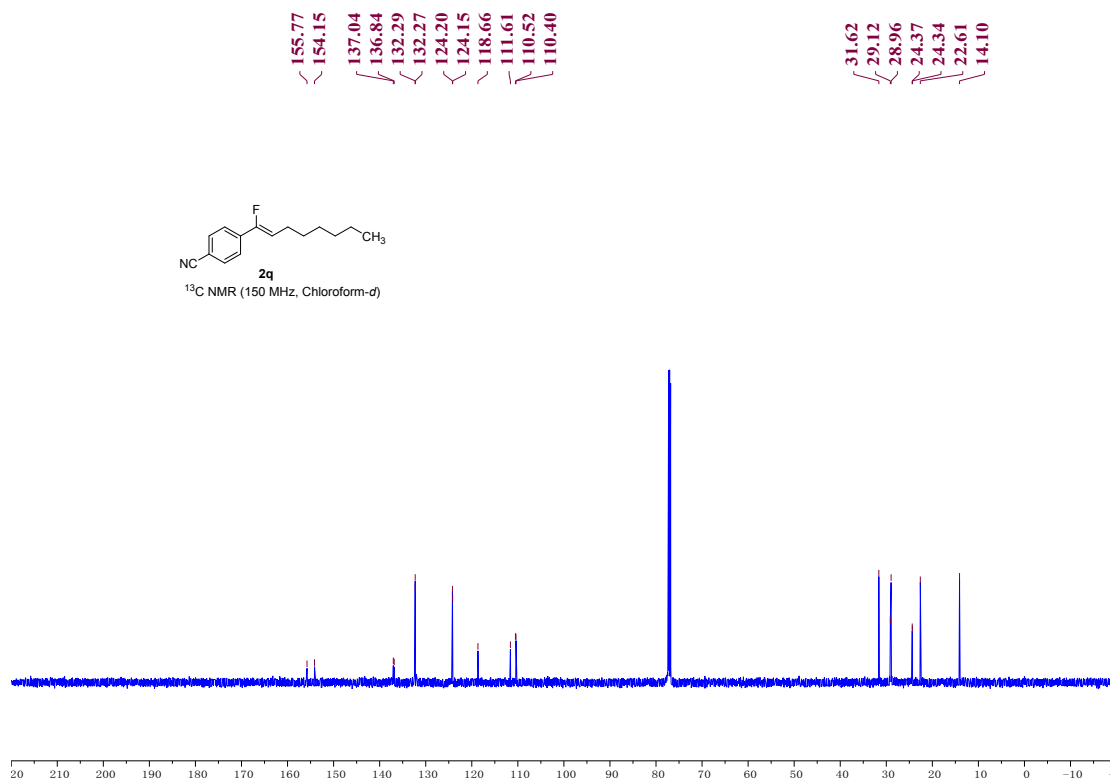

Figure S 51

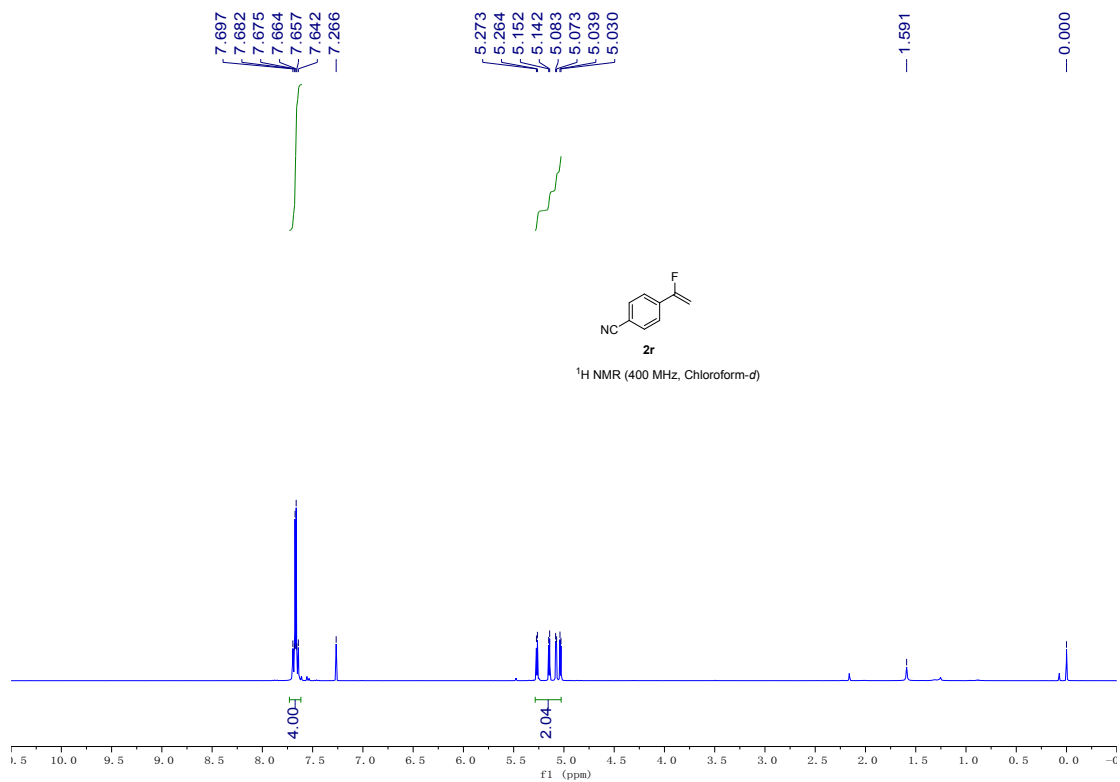

Figure S 52

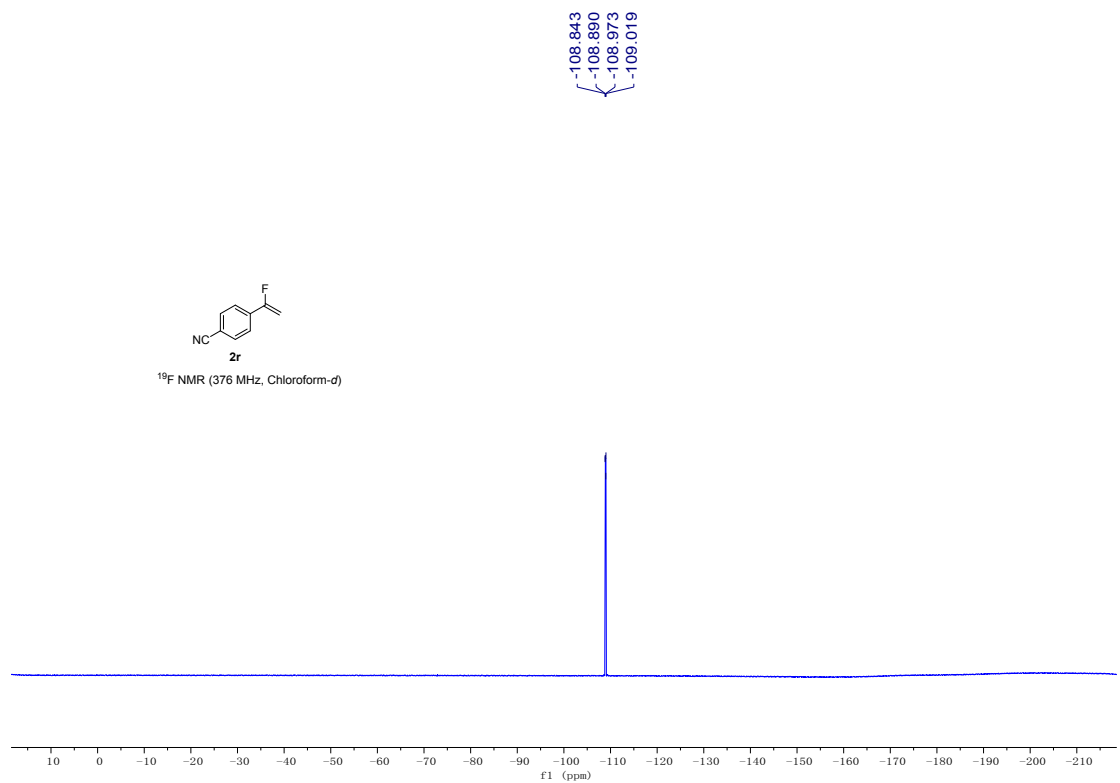

Figure S 53

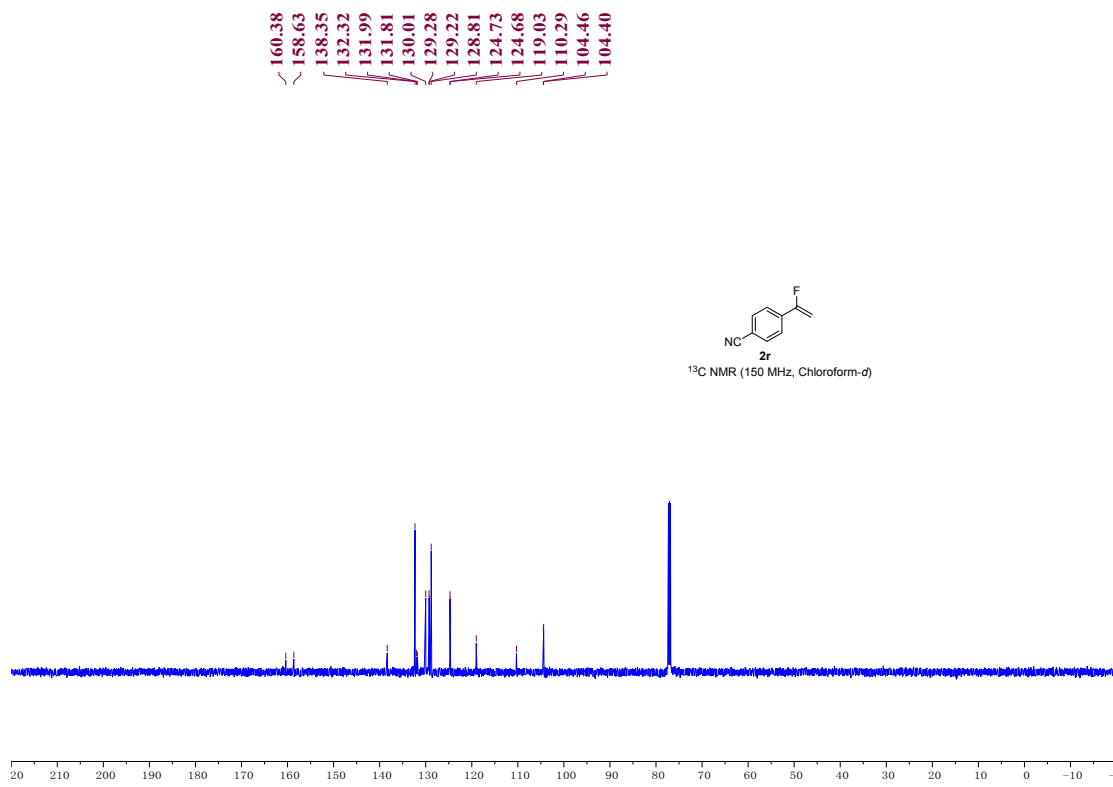

Figure S 54

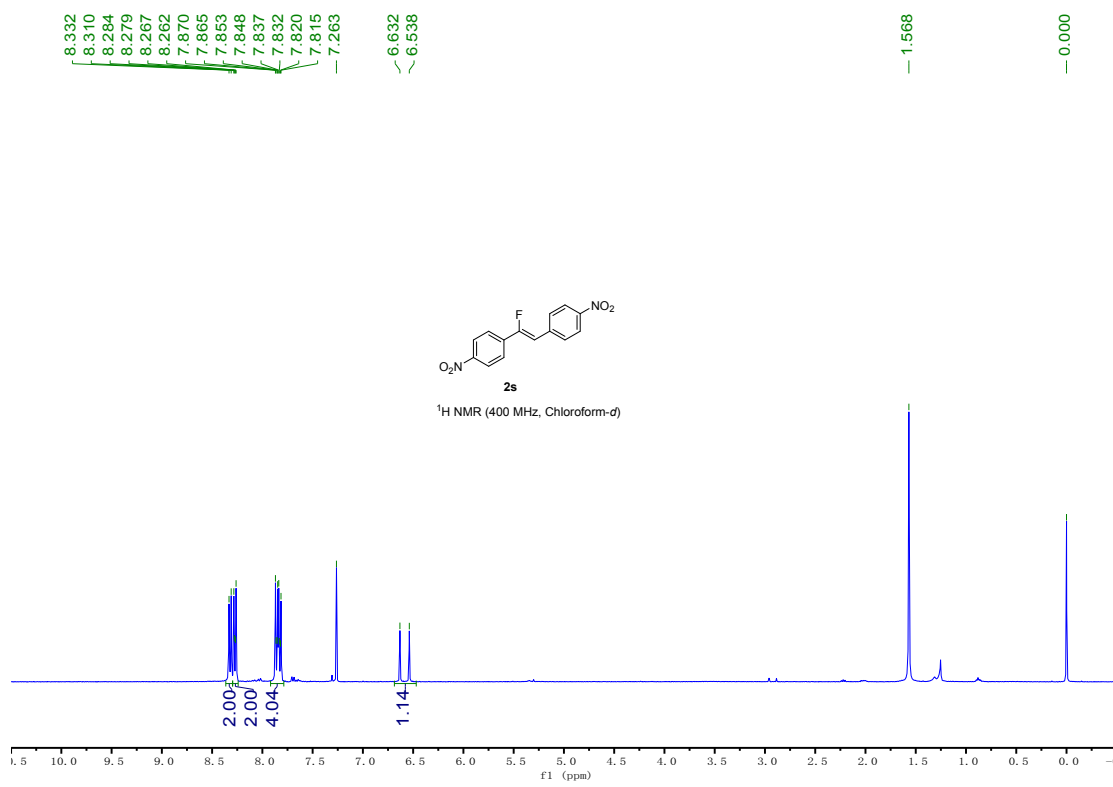

Figure S 55

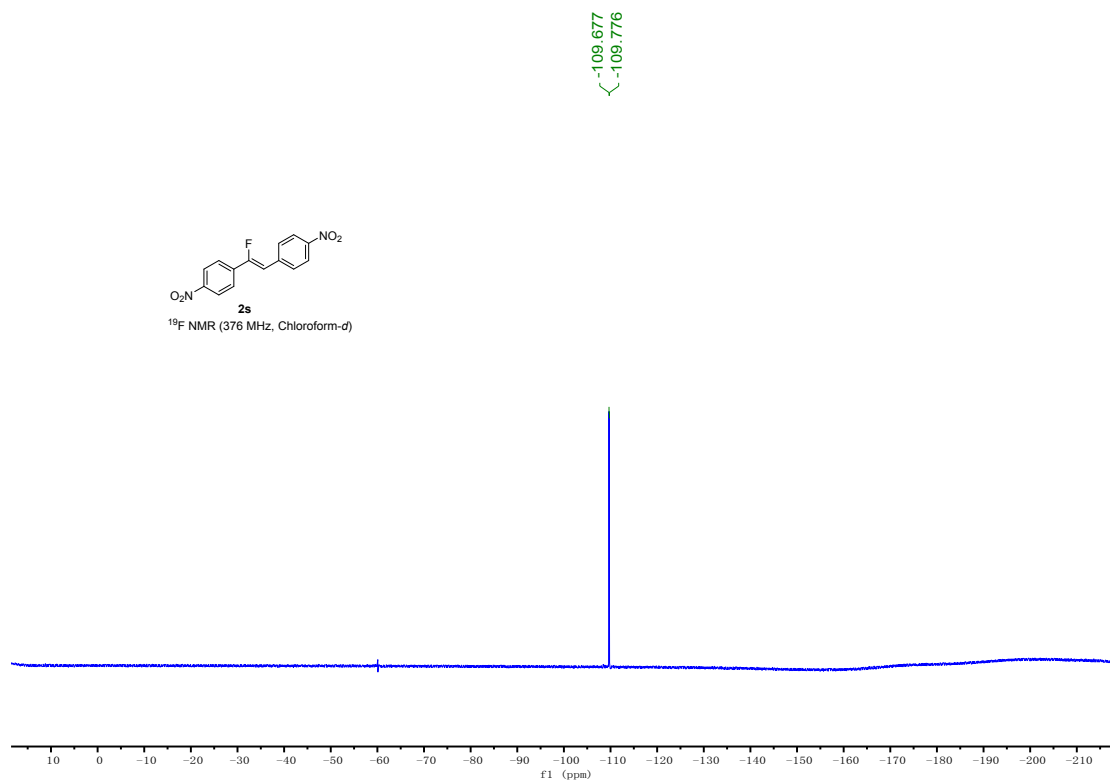

Figure S 56

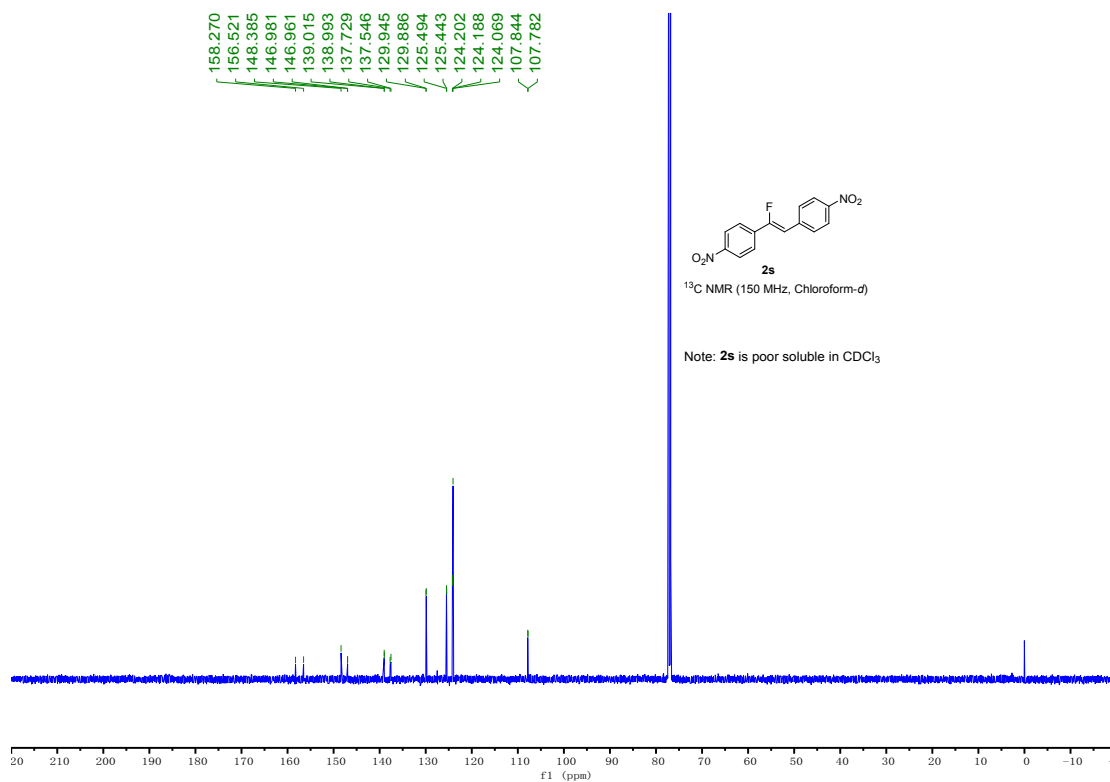

Figure S 57

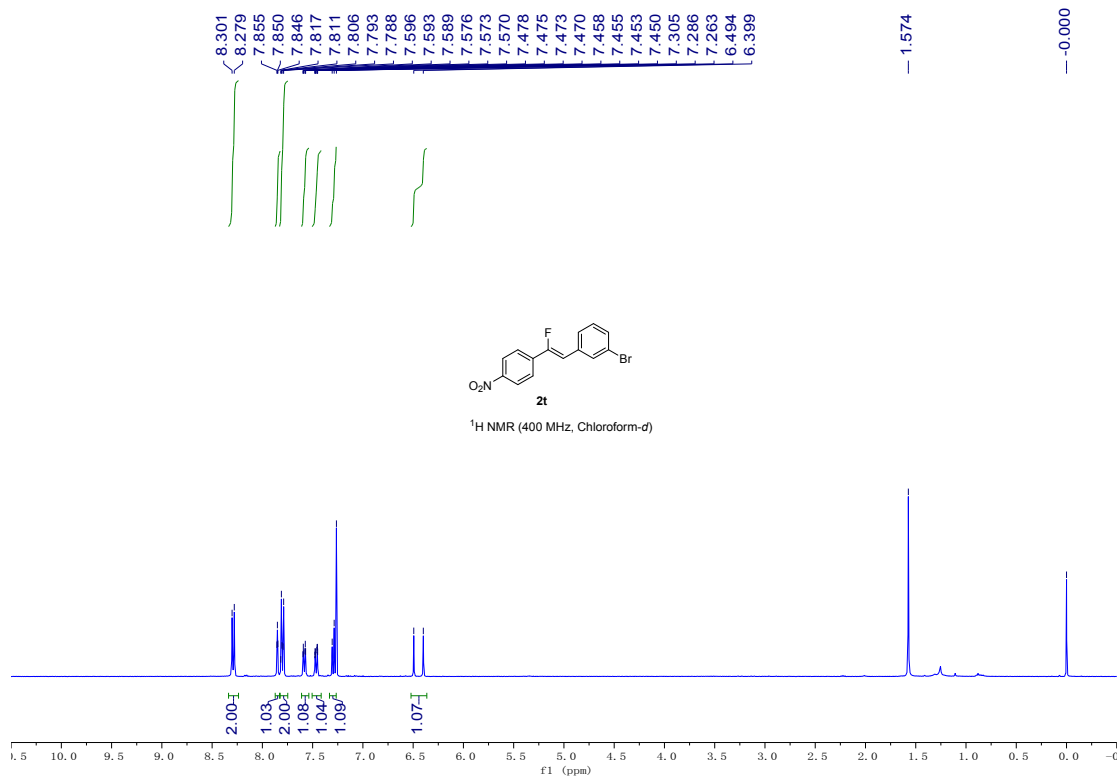

Figure S 58

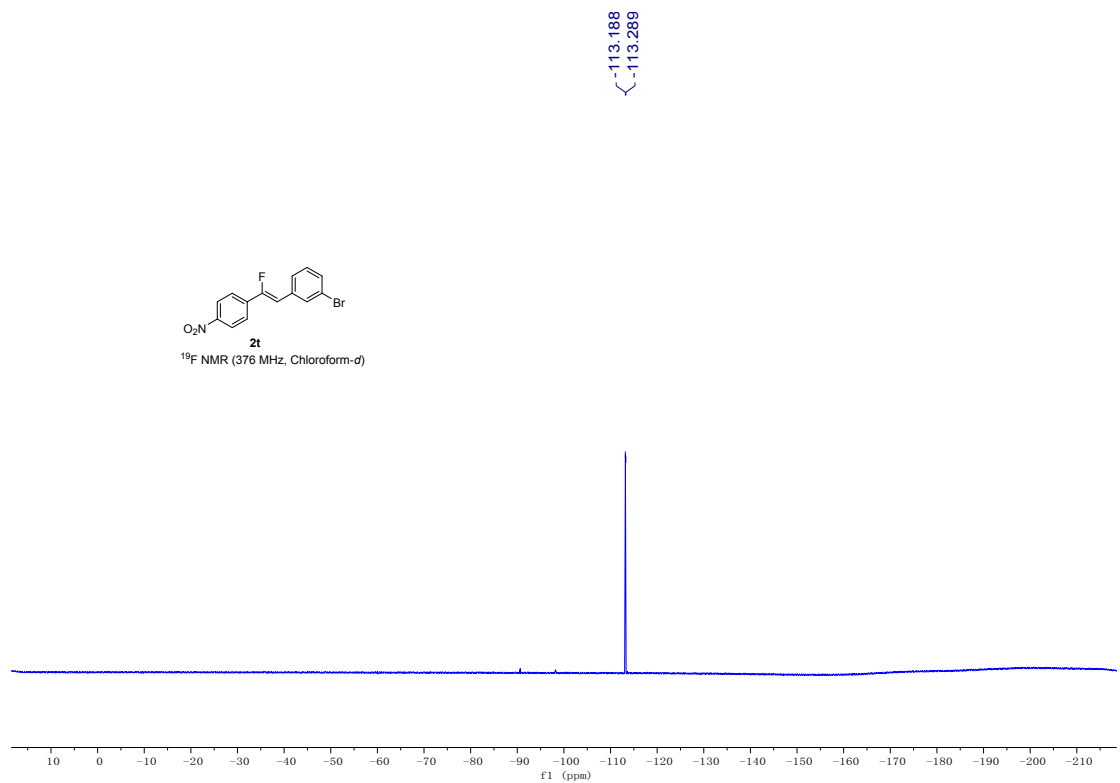

Figure S 59



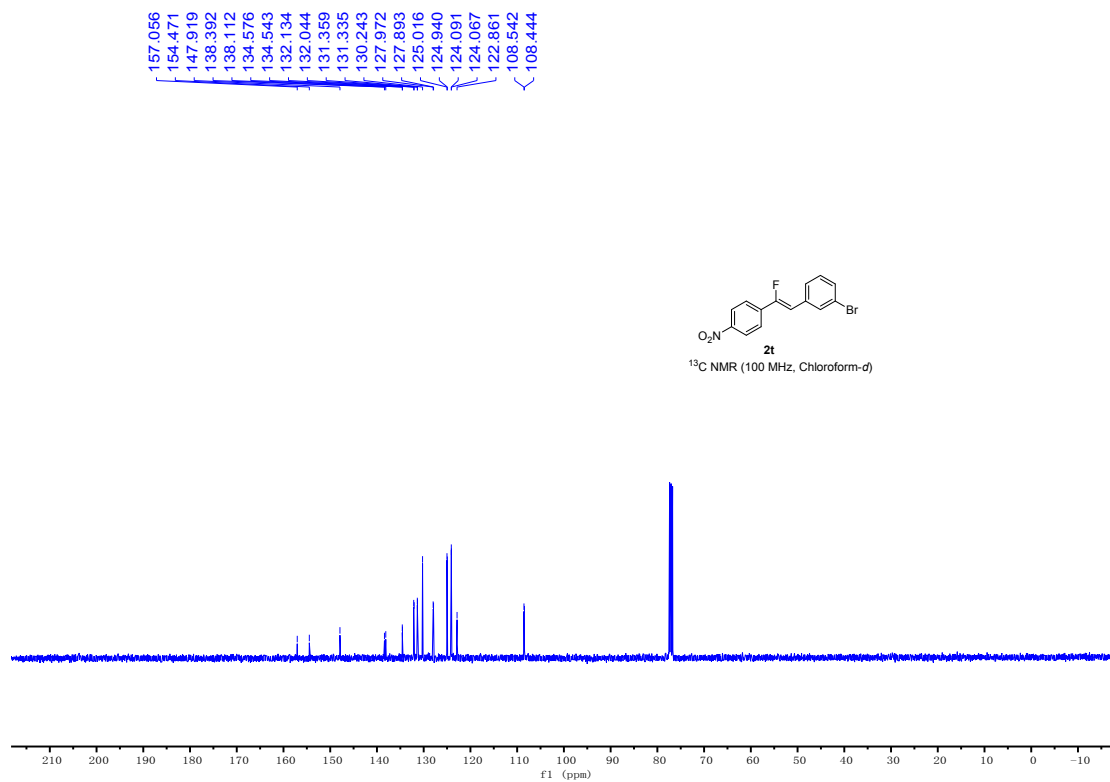

Figure S 60

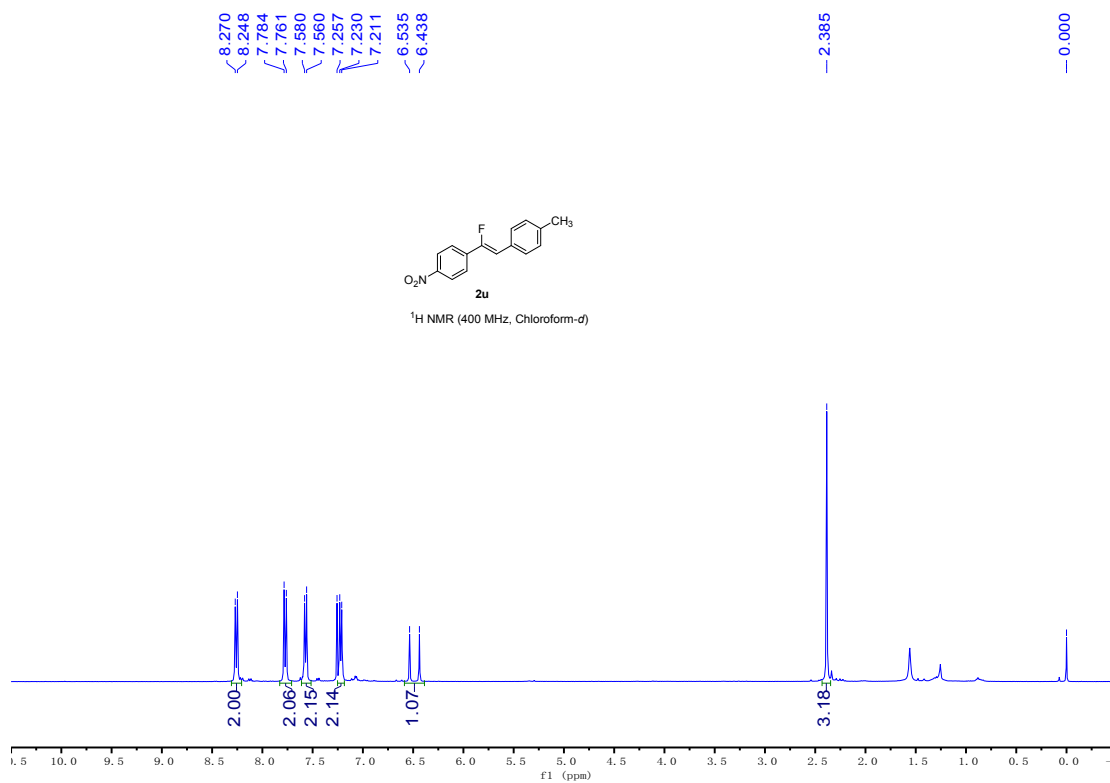

Figure S 61

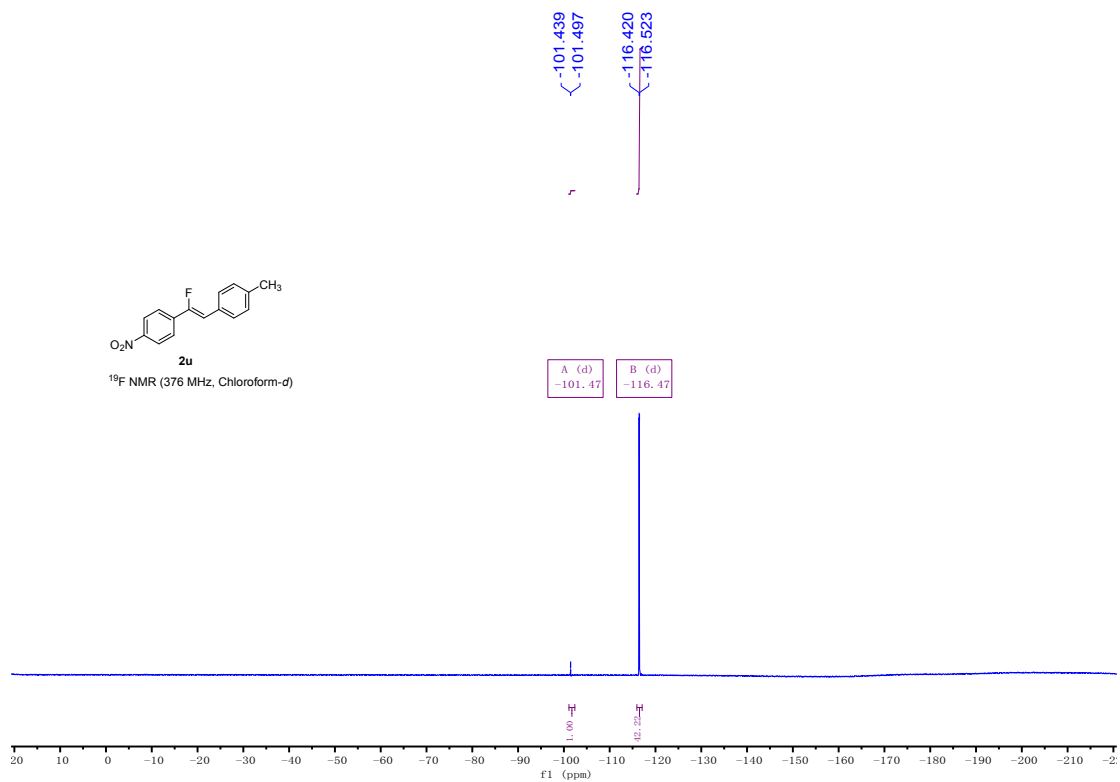

Figure S 62

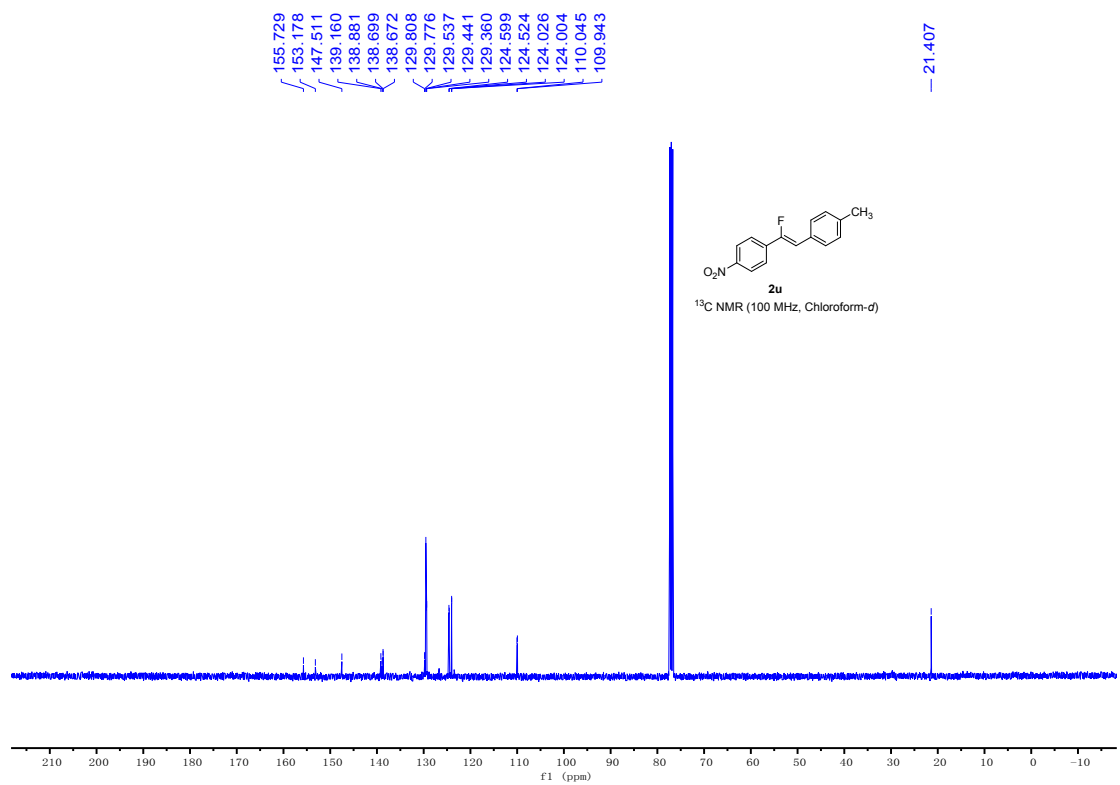

Figure S 63

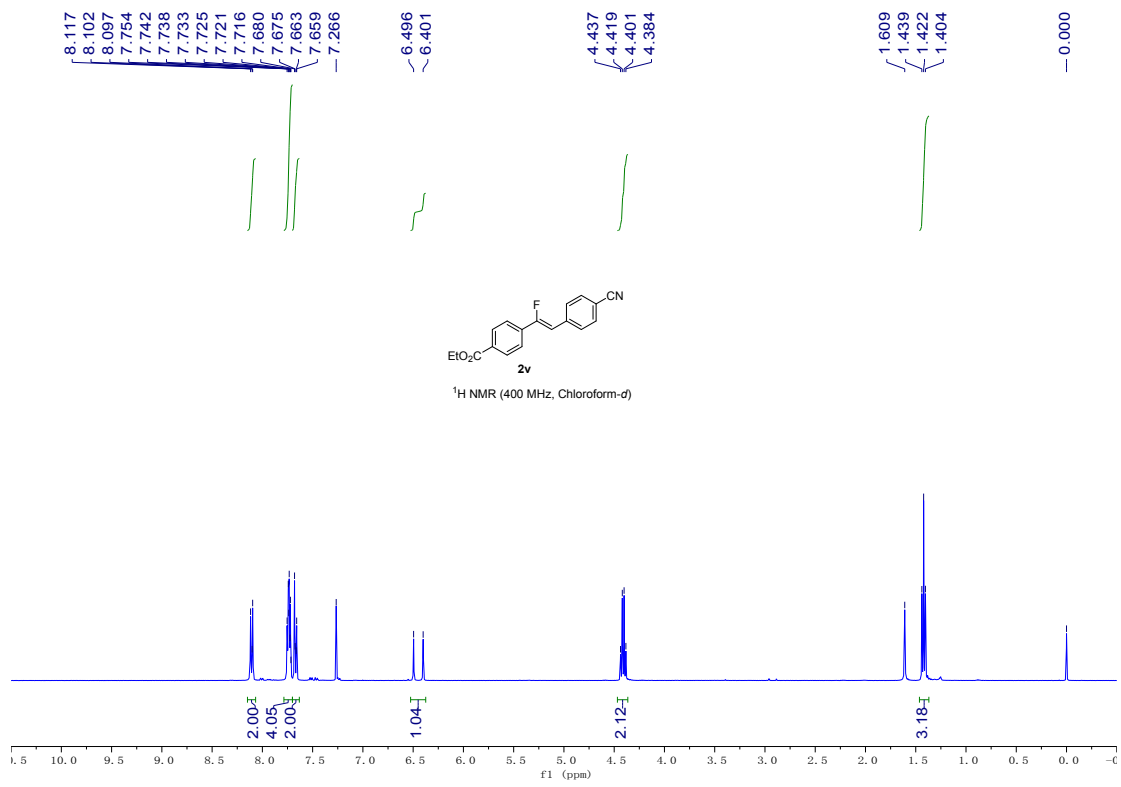

Figure S 64

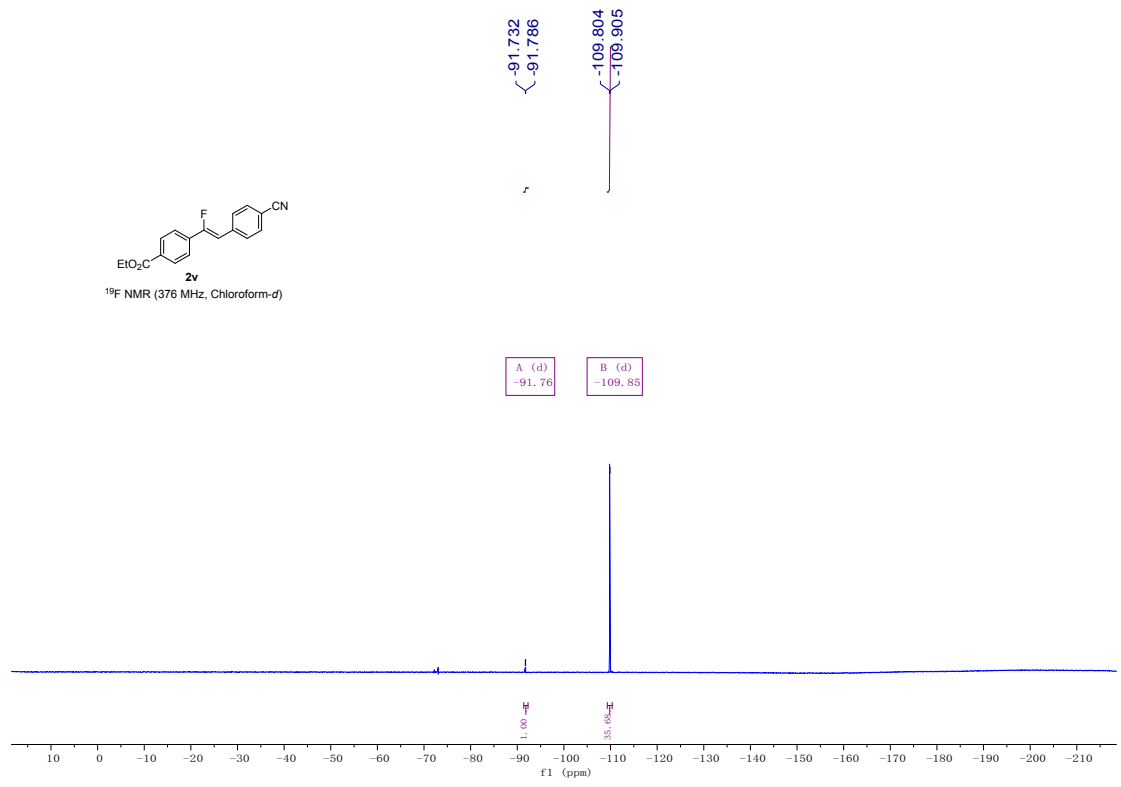

Figure S 65

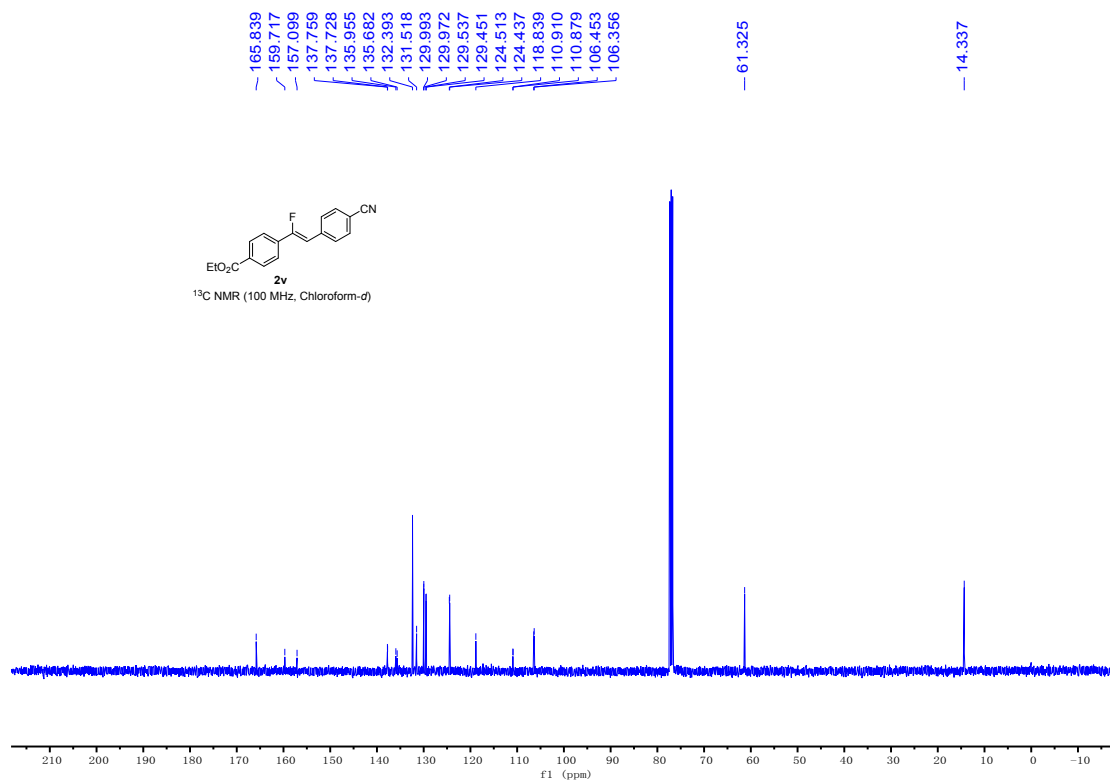

Figure S 66

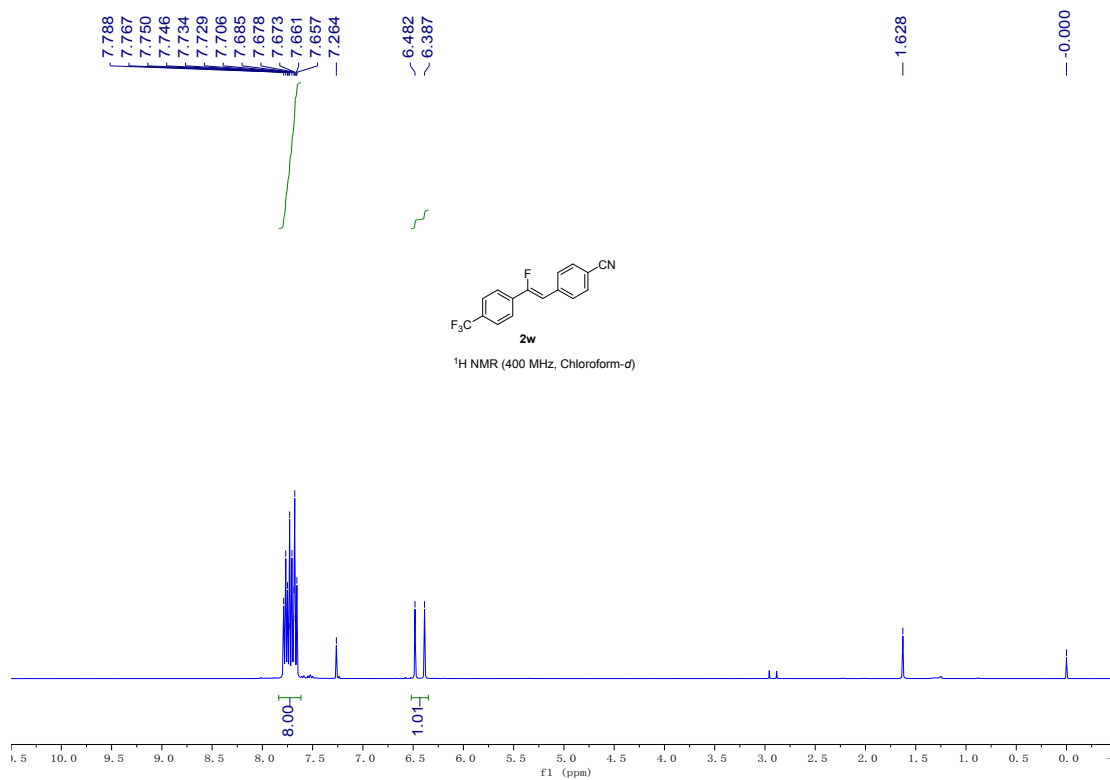

Figure S 67

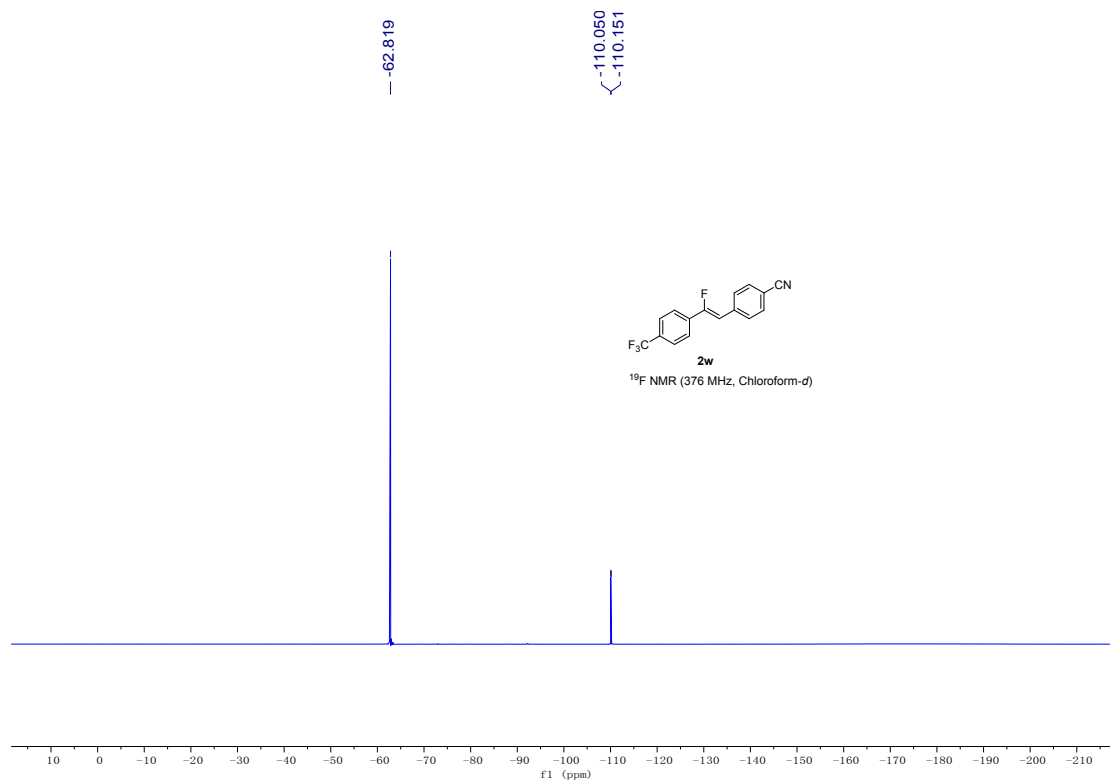

Figure S 68

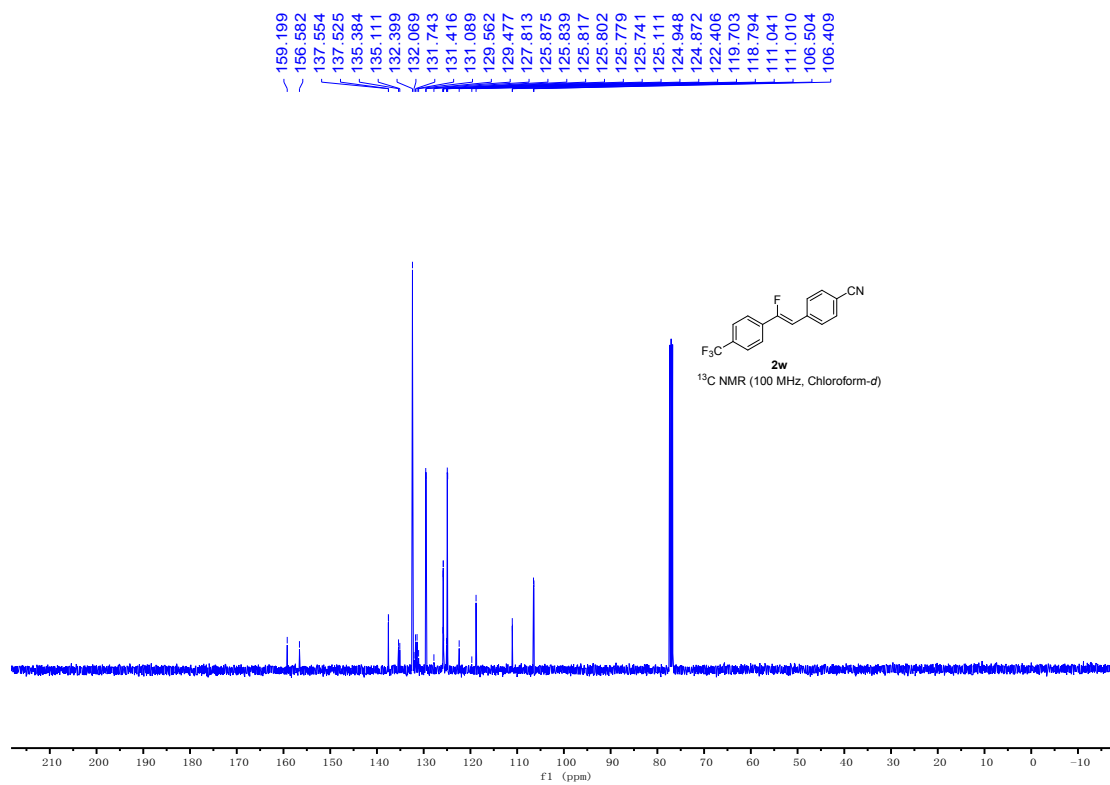

Figure S 69

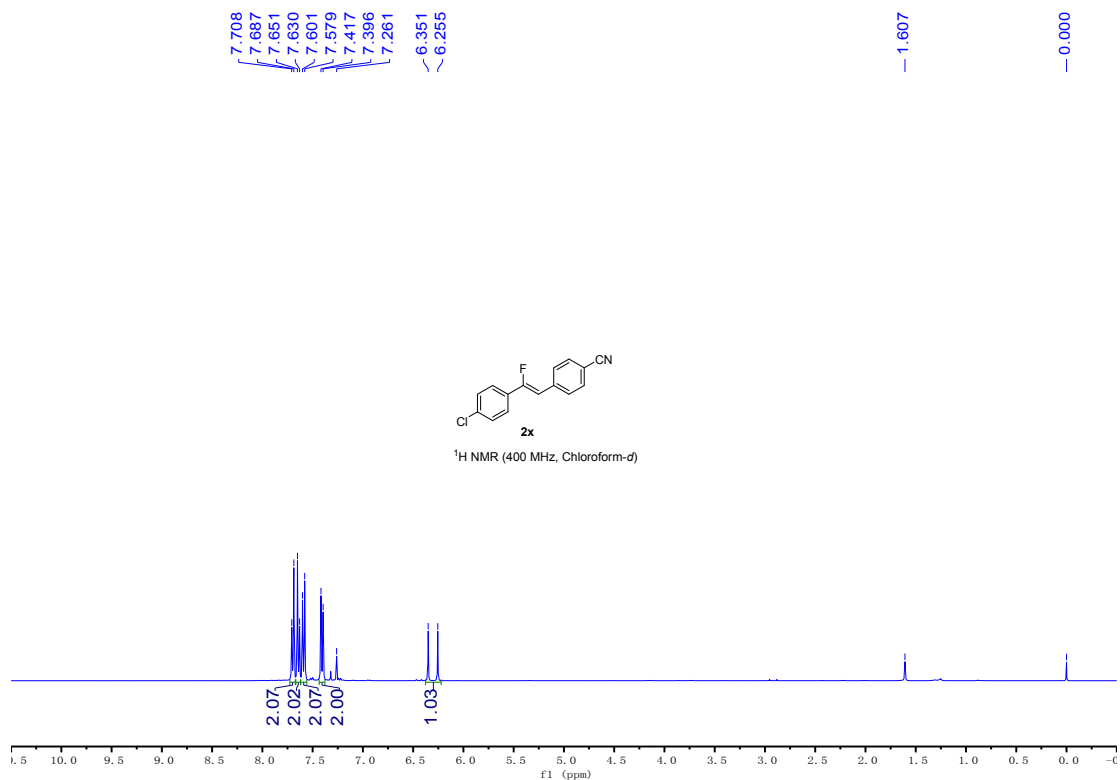

Figure S 70

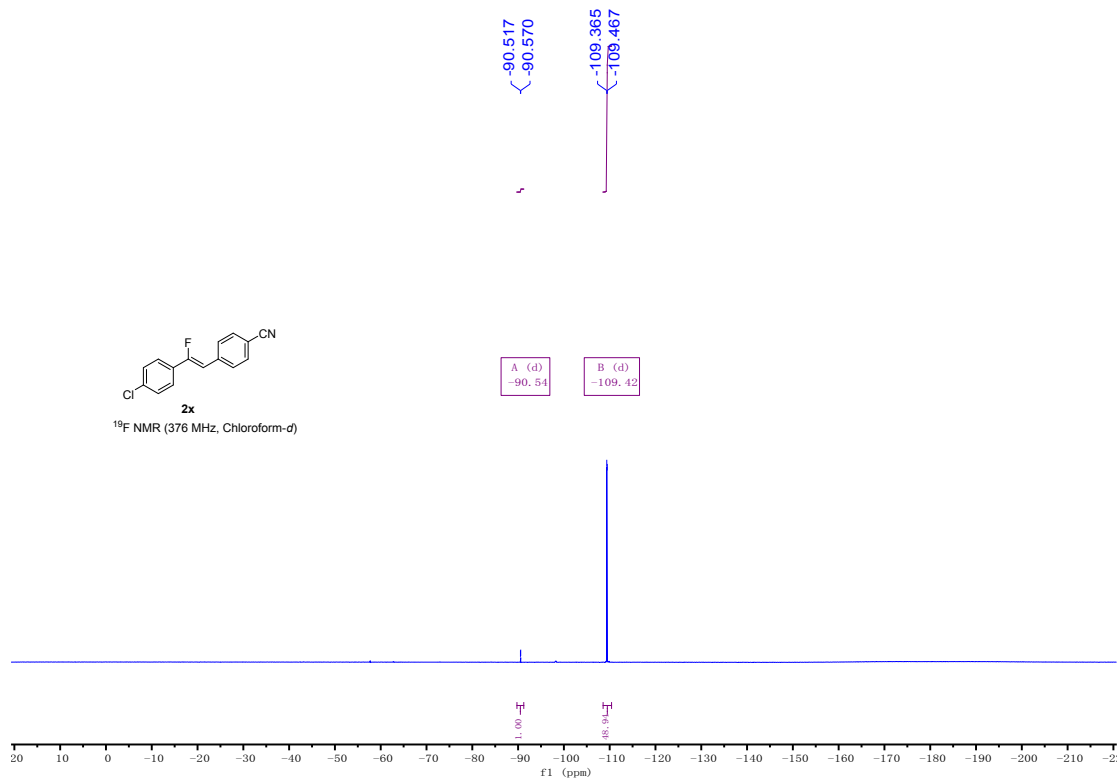

Figure S 71

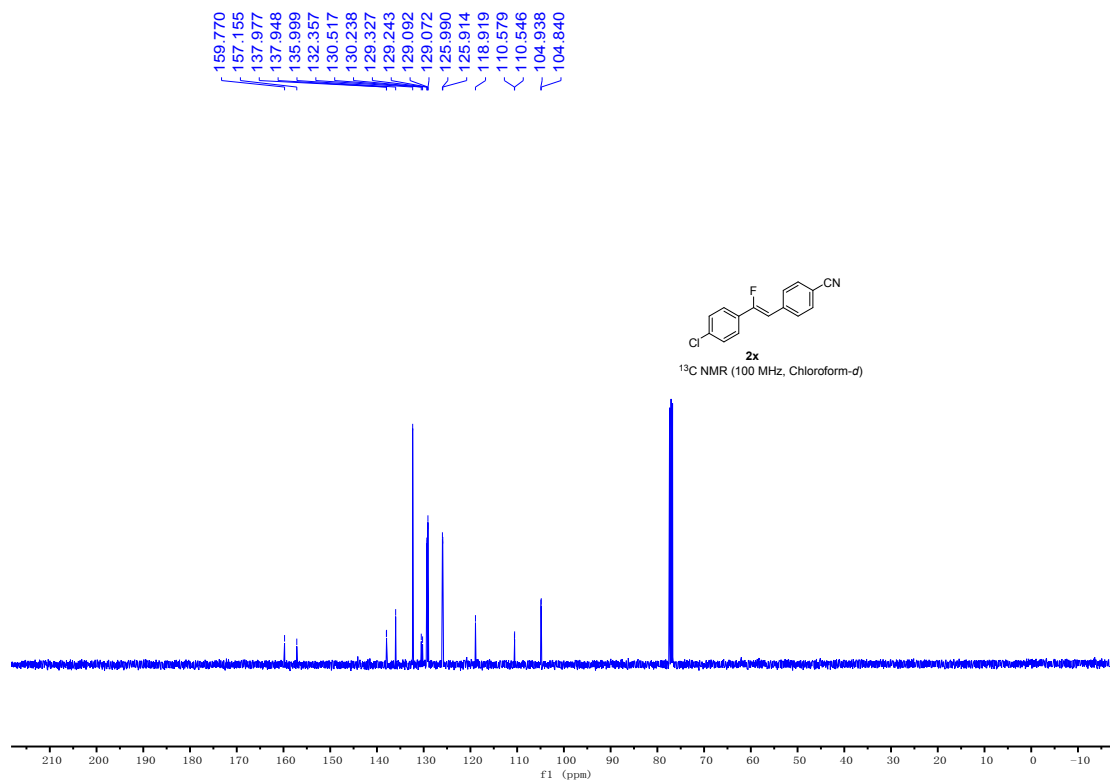

Figure S 72

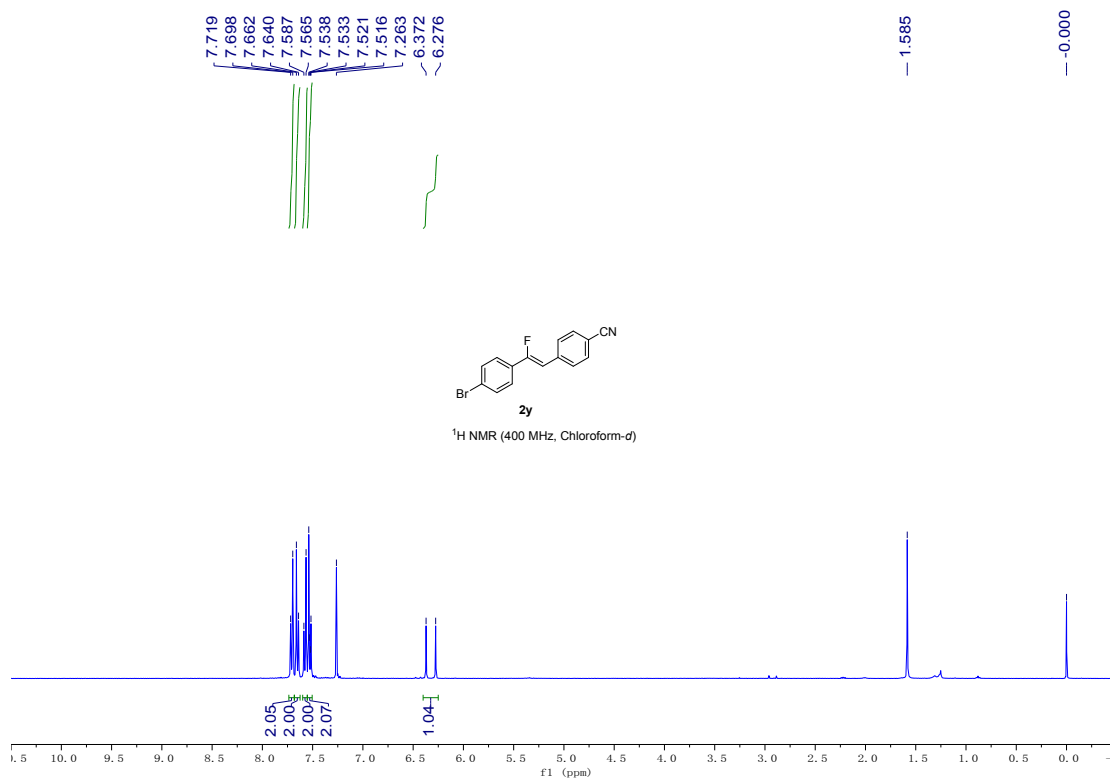

Figure S 73

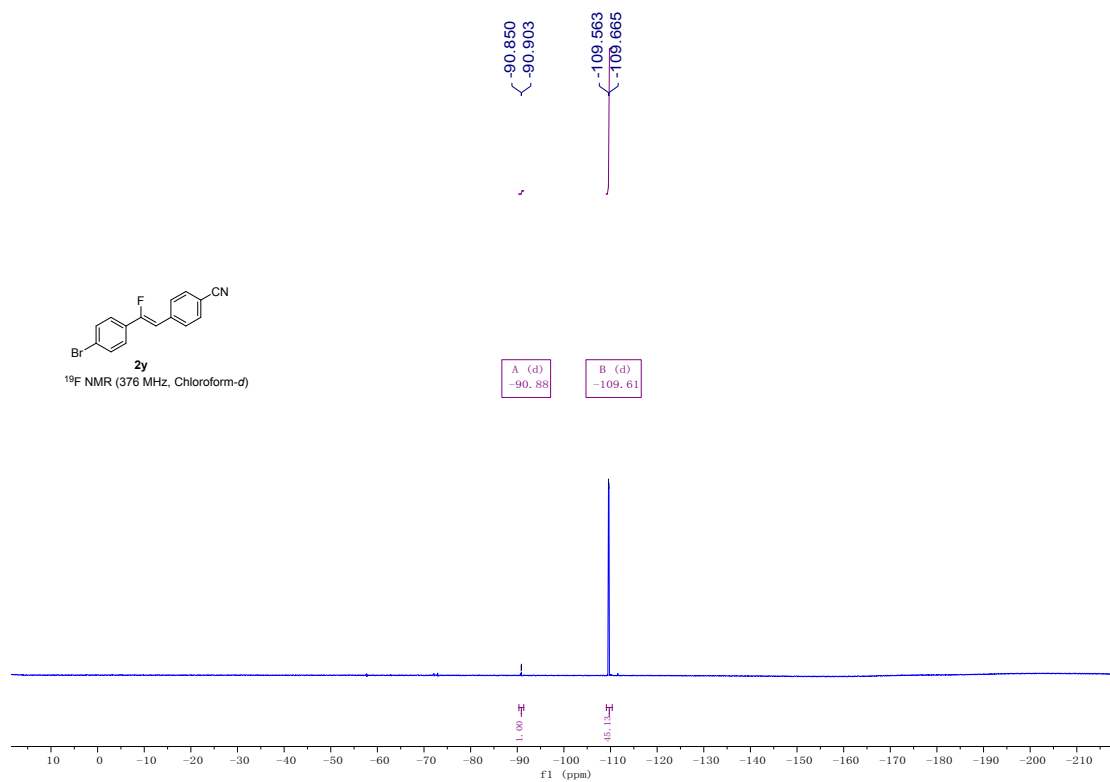

Figure S 74

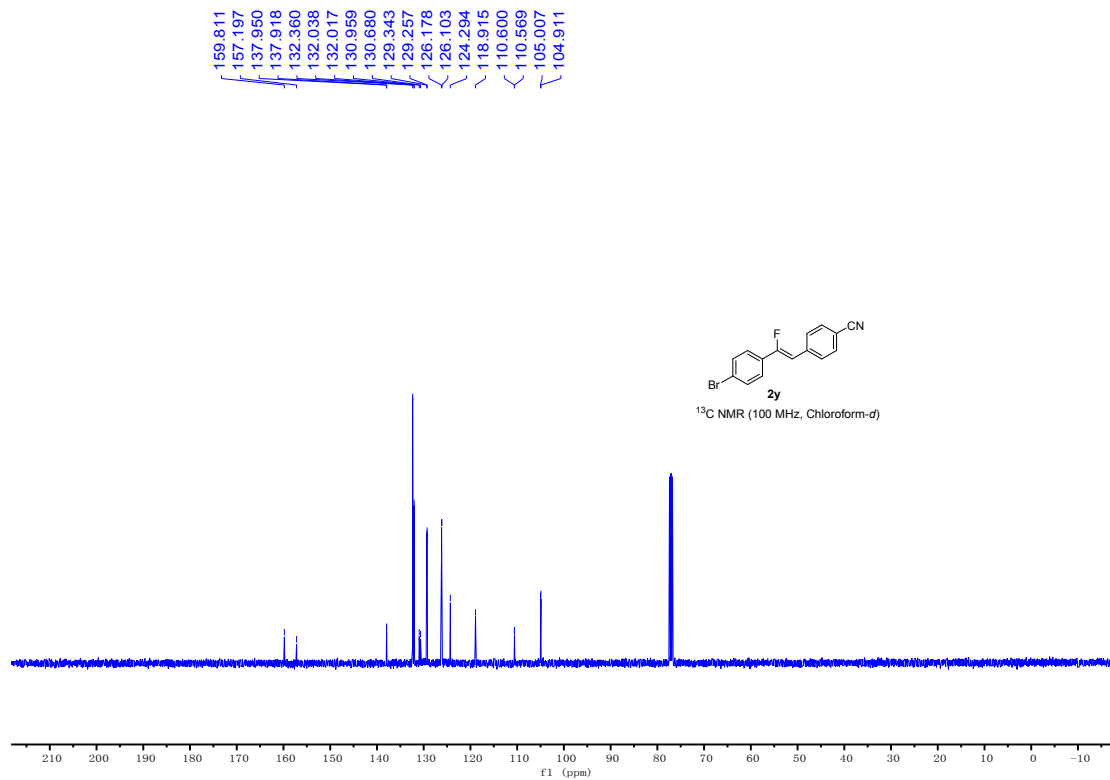

Figure S 75



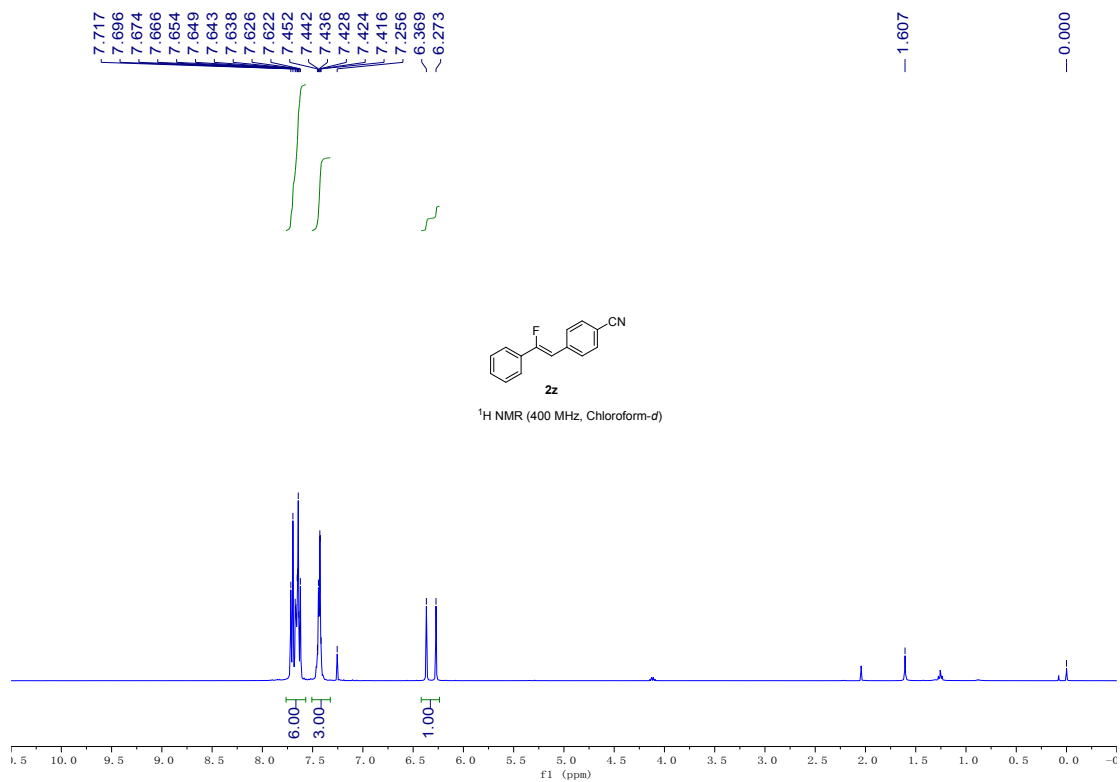

Figure S 76

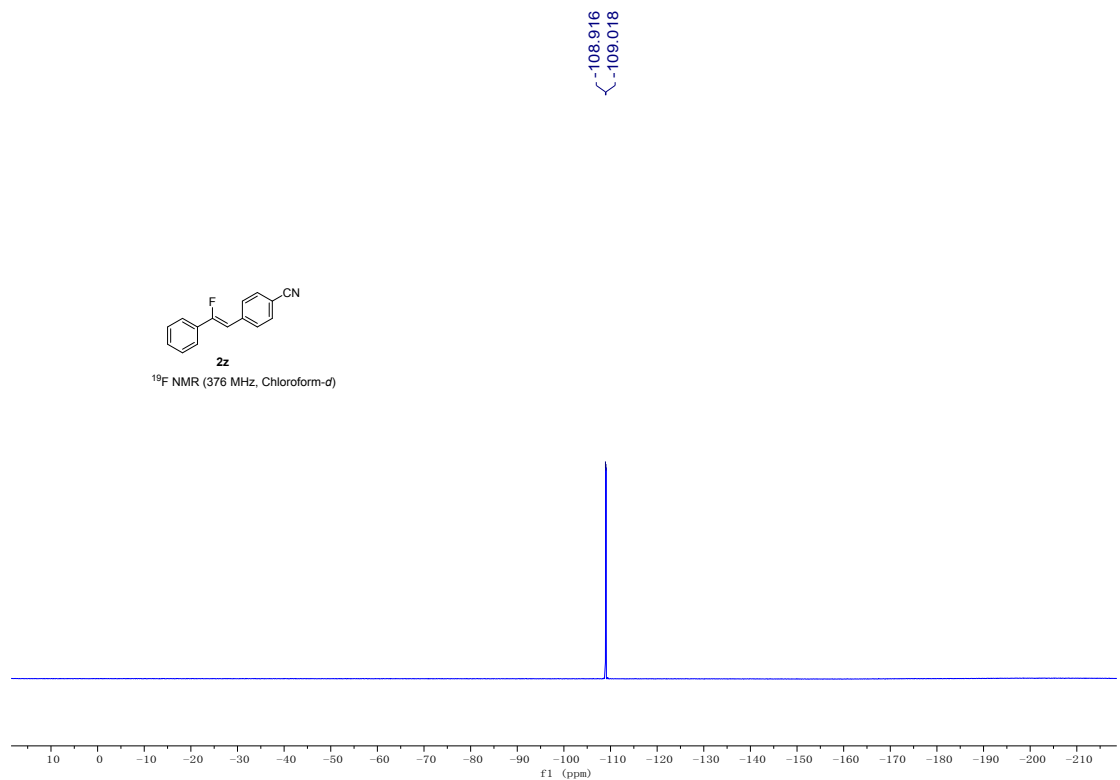

Figure S 77

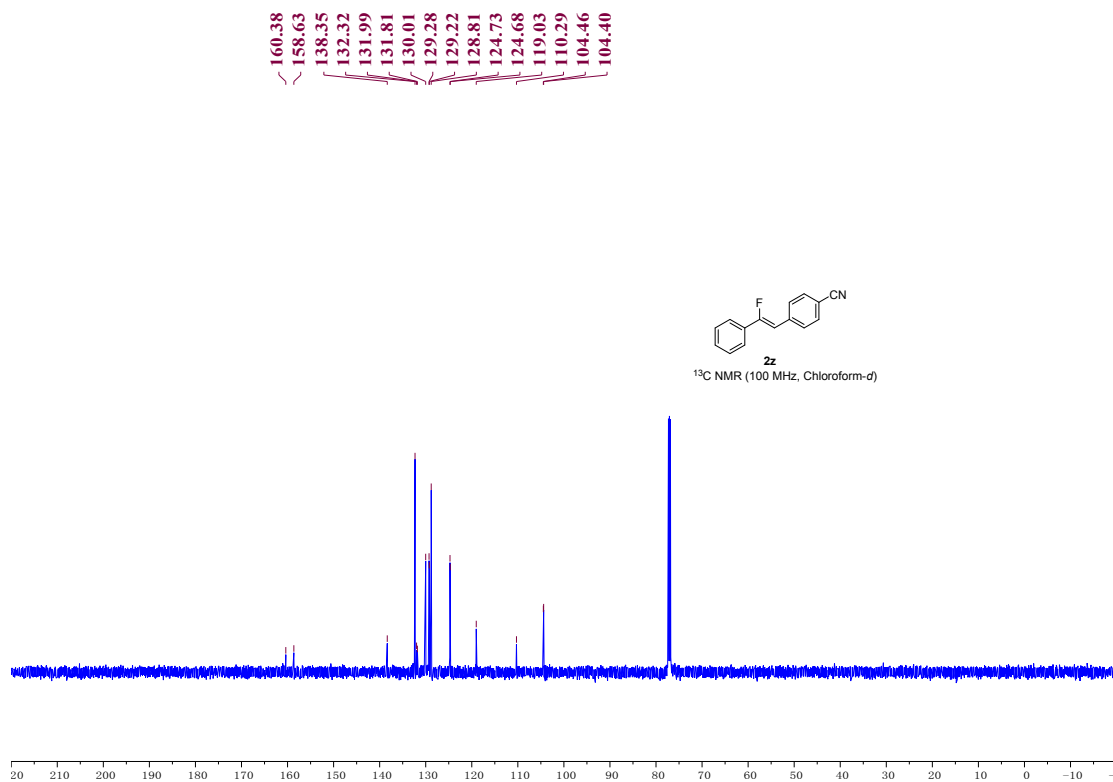

Figure S 78

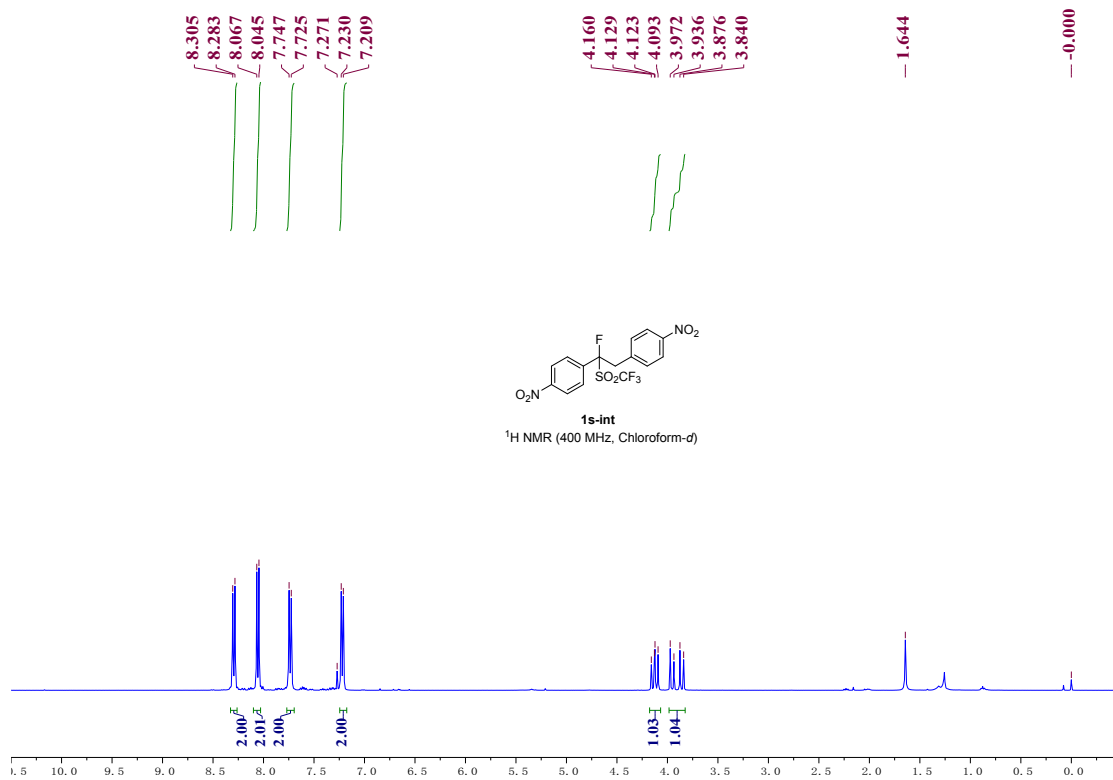

Figure S 79

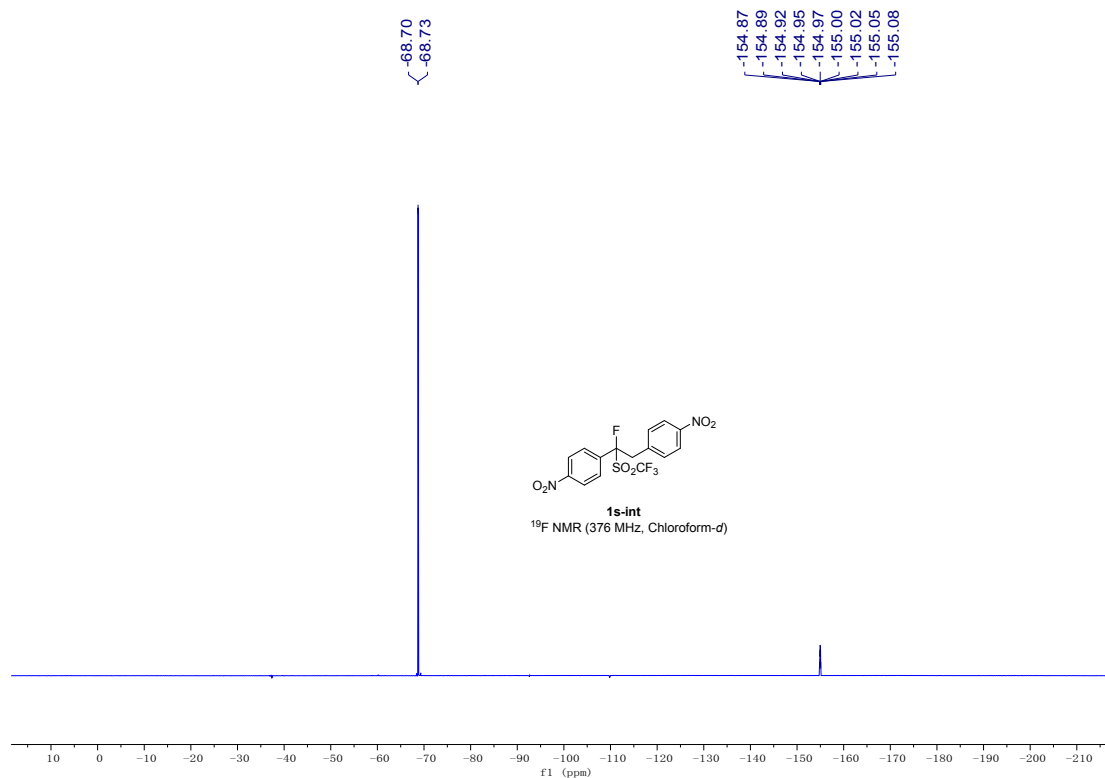

Figure S 80

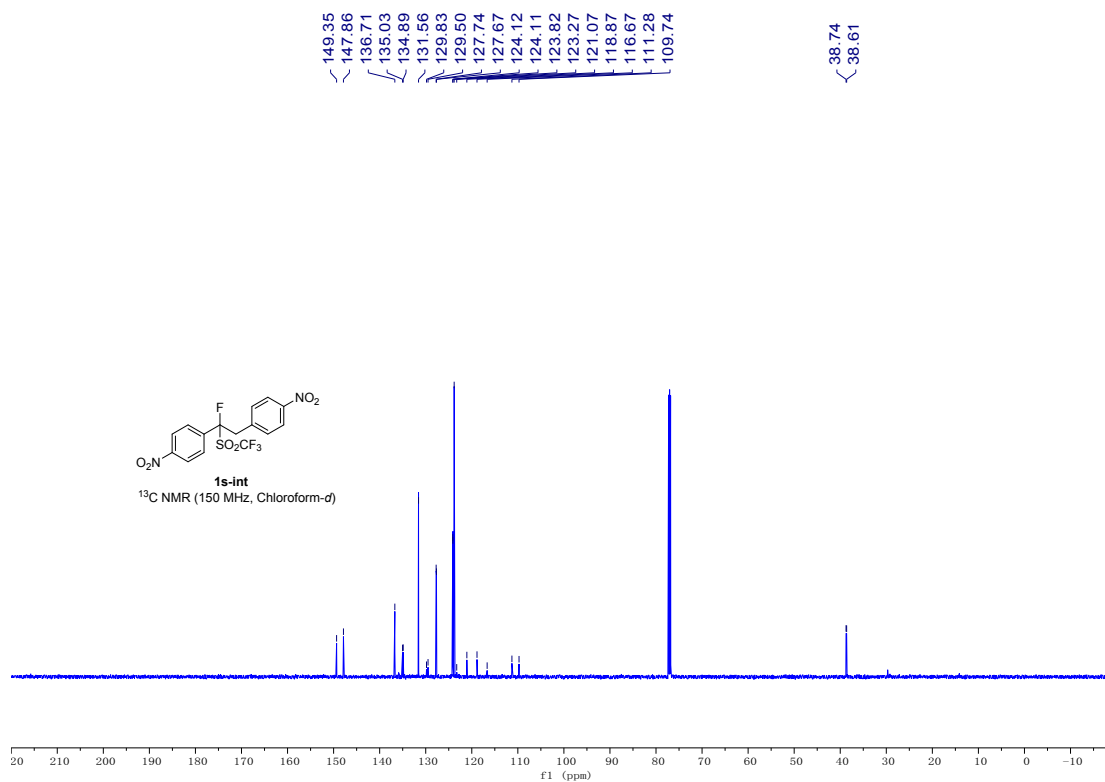

Figure S 81

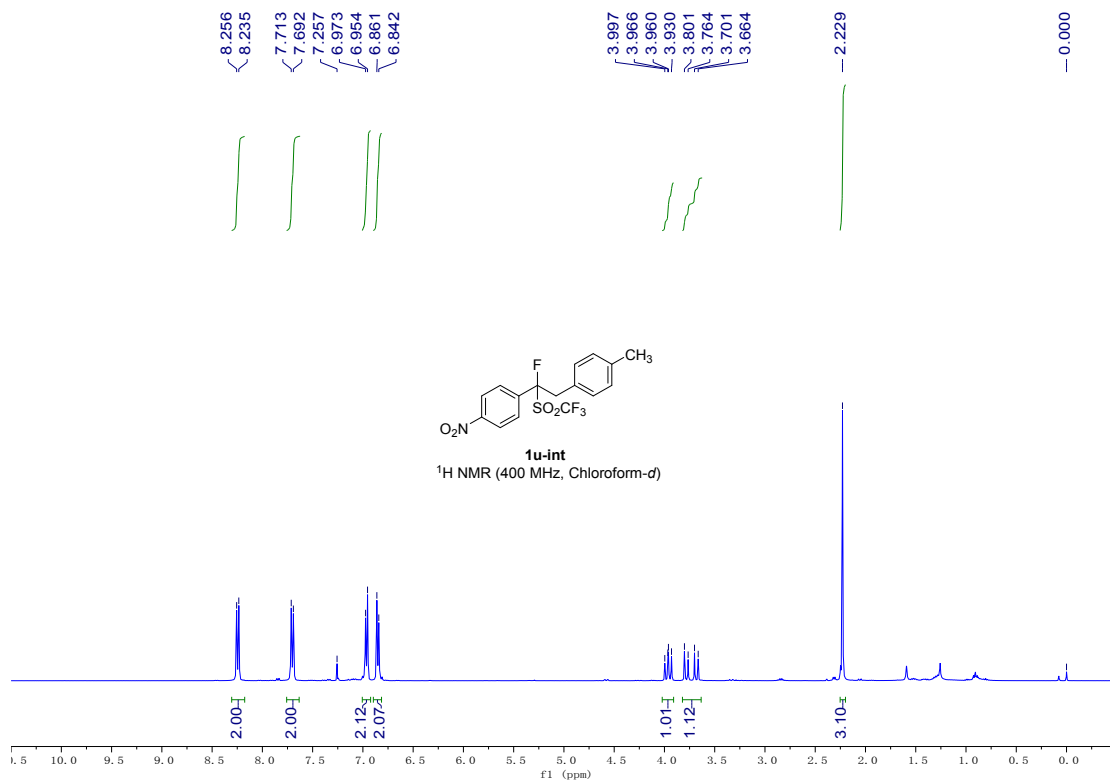

Figure S 82

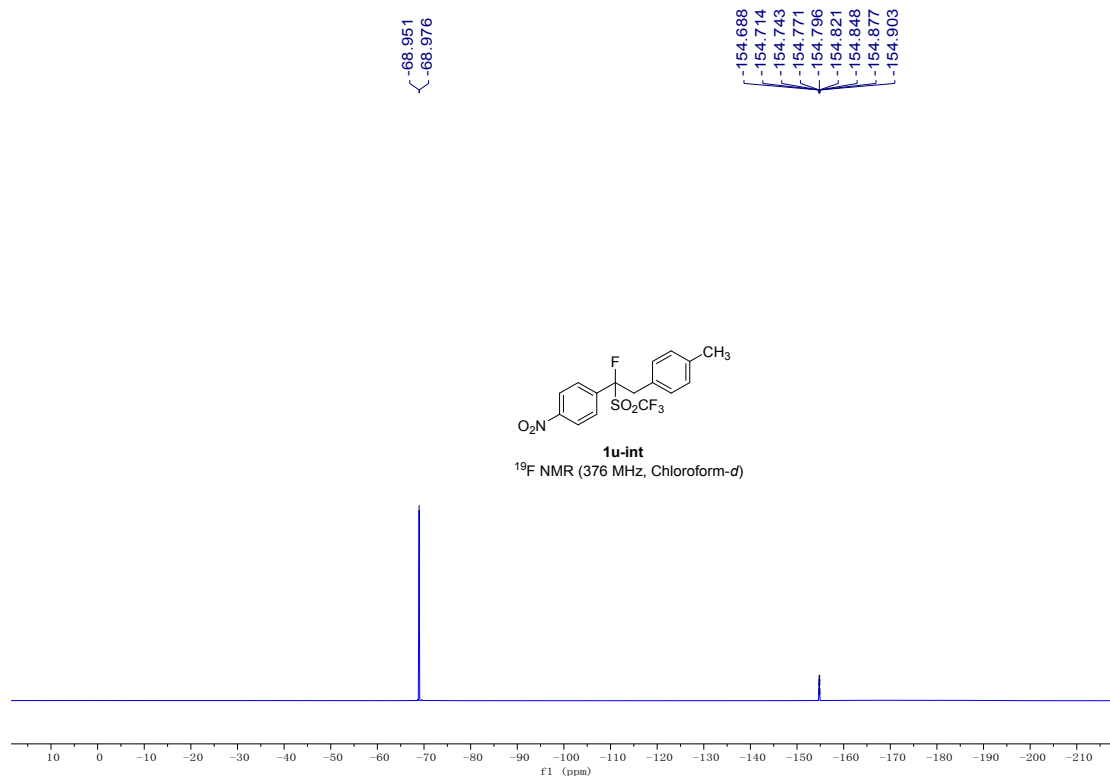

Figure S 83

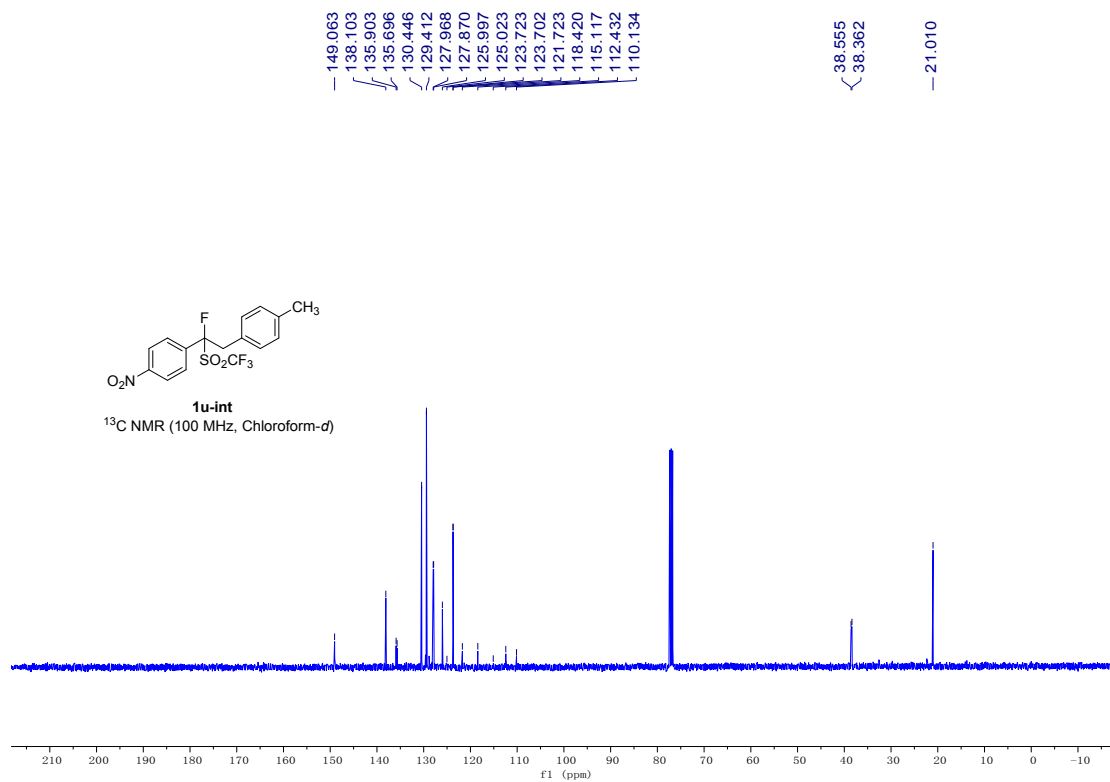

Figure S 84
